# Supplementary material for: Fighting for recovery on multiple fronts: The past, present, and future of clinical trials for spinal cord injury
Source: Front Cell Neurosci. 2022 Sep 7;16:977679. doi: 10.3389/fncel.2022.977679 (PMC9533868; doi:10.3389/fncel.2022.977679)
Supplement: Supplementary file 2 [file Table_1.xlsx]

## Sheet: Sheet 1 - 1411 trials
NCT Number	Title	Acronym	Status	Study Results	Conditions	Interventions	Outcome Measures	Sponsor/ Collaborators	Gender	Age	Phases	Enrollment	Funded Bys	Study Type	Study Designs	Other IDs	Start Date	Primary Completion Date	Completion Date	First Posted	Results First Posted	Last Update Posted	Locations	Study Documents	URL
NCT00583804	Implanted Myoelectric Control for Restoration of Hand Function in Spinal Cord Injury		Active, not recruiting	Has Results	Spinal Cord Injury|Tetraplegia	Device: IST-12	Grasp-Release Test|Activities of Daily Living Test|Adverse Events	MetroHealth Medical Center|Case Western Reserve University|VA Office of Research and Development|FDA Office of Orphan Products Development	All	18 Years and older ¬† (Adult, Older Adult)	Not Applicable	10	Other|U.S. Fed	Interventional	Allocation: Non-Randomized|Intervention Model: Single Group Assignment|Masking: None (Open Label)|Primary Purpose: Treatment	IRB89-00027|VA Merit Review A3707R	1989-04-01	2015-01-01	2026-01-01	2007-12-31	2018-06-08	2020-12-07	MetroHealth Medical Center, Cleveland, Ohio, United States		https://ClinicalTrials.gov/show/NCT00583804
NCT02138110	The INSPIRE Study: Probable Benefit of the Neuro-Spinal Scaffold for Treatment of AIS A Thoracic Acute Spinal Cord Injury		Active, not recruiting	Has Results	Traumatic Thoracic Acute Spinal Cord Injury	Device: Neuro-Spinal Scaffold	Percentage of Patients With Improvement in AIS Grade of One or More Levels|Number of Participants Stratified by Change From Baseline in Neurological Level of Injury (NLI) at 6 Months|Number of Participants Stratified by Change From Baseline in ISNCSCI Sensory Pin Prick Score|Number of Participants Stratified by Change From Baseline in ISNCSCI Sensory Light Touch Score|Change From Baseline in ISNC…	InVivo Therapeutics	All	16 Years to 70 Years ¬† (Child, Adult, Older Adult)	Not Applicable	20	Industry	Interventional	Allocation: N/A|Intervention Model: Single Group Assignment|Masking: None (Open Label)|Primary Purpose: Treatment	InVivo-100-101	2014-10-13	2017-11-29	2024-08-01	2014-05-14	2018-12-28	2021-11-22	Barrow Neurological Institute - St. Joseph's Hospital and Medical Center, Phoenix, Arizona, United States|USC/Keck School of Medicine, Los Angeles, California, United States|University of California/Davis Medical Center, Sacramento, California, United States|Cooper Neurological Institute, Camden, New Jersey, United States|Carolina NeuroSurgery and Spine Associates/Carolinas Rehabilitation, Charlo…	Study Protocol, https://ClinicalTrials.gov/ProvidedDocs/10/NCT02138110/Prot_002.pdf|"Statistical Analysis Plan", https://ClinicalTrials.gov/ProvidedDocs/10/NCT02138110/SAP_000.pdf	https://ClinicalTrials.gov/show/NCT02138110
NCT02903823	Intrathecal (IT) Baclofen Drug Distribution	ITB	Active, not recruiting	Has Results	Muscle Spasticity	Drug: Baclofen bolus injection	Subjects Experiencing Maximal MAS Change From Baseline - Spasticity of Cerebral Origin|Subjects Experiencing Maximal MAS Change From Baseline - Spasticity of Spinal Origin	Vanderbilt University|Medtronic|Vanderbilt University Medical Center	All	18 Years to 50 Years ¬† (Adult)	Phase 4	27	Other|Industry	Interventional	Allocation: N/A|Intervention Model: Single Group Assignment|Masking: None (Open Label)|Primary Purpose: Basic Science	151399	2016-04-22	2019-02-01	2021-12-31	2016-09-16	2021-04-27	2021-04-27	Vanderbilt University, Nashville, Tennessee, United States	Study Protocol and Statistical Analysis Plan, https://ClinicalTrials.gov/ProvidedDocs/23/NCT02903823/Prot_SAP_000.pdf	https://ClinicalTrials.gov/show/NCT02903823
NCT03877432	Non-invasive Nerve Stimulation for Inhibition of Bladder Incontinence in Spinal Cord Injured Subjects.		Active, not recruiting	Has Results	Spinal Cord Injuries	Device: Dermatome stimulation	The Changes of Bladder Capacity (mL) by Using Urodynamic Measurement|The Changes of Bladder Pressure (cmH2O) During Urodynamic Measurement	Taipei Medical University	All	18 Years and older ¬† (Adult, Older Adult)	Not Applicable	10	Other	Interventional	Allocation: N/A|Intervention Model: Single Group Assignment|Masking: None (Open Label)|Primary Purpose: Treatment	N201605025	2016-10-21	2016-12-02	2021-08-01	2019-03-15	2021-01-20	2021-01-20		Study Protocol and Statistical Analysis Plan, https://ClinicalTrials.gov/ProvidedDocs/32/NCT03877432/Prot_SAP_000.pdf	https://ClinicalTrials.gov/show/NCT03877432
NCT01005615	Patterned Functional Electrical Stimulation (FES) Ergometry of Arm and Shoulder in Individuals With Spinal Cord Injury		Active, not recruiting	No Results Available	Spinal Cord Injury	Device: Non-FES Upper Extremity Exercise|Device: RT300-SLSA, from Restorative Therapies, Inc.	X-ray|Modified Ashworth scale|Capabilities of the Upper Extremity (CUE) test|Jebsen-Taylor Hand Function (JTHF) test|Box and Blocks (BB) test|Action Research Arm (ARA) test|Range of motion|Numerical Rating Scale (NRS).|American Spinal Injury Association (ASIA) exam	Hugo W. Moser Research Institute at Kennedy Krieger, Inc.|U.S. Army Medical Research and Development Command	All	18 Years to 55 Years ¬† (Adult)	Phase 1|Phase 2	18	Other|U.S. Fed	Interventional	Allocation: Randomized|Intervention Model: Crossover Assignment|Masking: Single (Outcomes Assessor)|Primary Purpose: Treatment	NA_00014481|w81xwh-08-2-0192|W81XWH-09-2-0186	2009-09-01	2021-12-01	2021-12-01	2009-11-01		2021-01-15	Kennedy Krieger Institute, Baltimore, Maryland, United States		https://ClinicalTrials.gov/show/NCT01005615
NCT02339233	Epi Stim to Facilitate Standing and Stepping		Active, not recruiting	No Results Available	Spinal Cord Injury	Device: Standing and Stepping with spinal cord Epidural Stimulation	Change from baseline of lower extremity independence time during 10 min standing bout after 160 sessions (1 year)|Change from baseline of stepping independence time during 6 min stepping bout after 160 sessions (1 year)|Change from baseline of number of consecutive hip flexion repetitions performed within one minute after 160 sessions (1 year)	University of Louisville|University of California, Los Angeles|Christopher Reeve Paralysis Foundation|Kessler Foundation|The Leona M. and Harry B. Helmsley Charitable Trust|National Institute for Biomedical Imaging and Bioengineering (NIBIB)	All	18 Years to 75 Years ¬† (Adult, Older Adult)	Not Applicable	8	Other|NIH	Interventional	Allocation: N/A|Intervention Model: Single Group Assignment|Masking: None (Open Label)|Primary Purpose: Basic Science	07.0066 Epi Stim|5R01EB007615	2010-01-01	2020-09-30	2020-09-30	2015-01-15		2020-03-27	University of Louisville, Louisville, Kentucky, United States		https://ClinicalTrials.gov/show/NCT02339233
NCT01364480	Microelectrode Brain-Machine Interface for Individuals With Tetraplegia		Active, not recruiting	No Results Available	Tetraplegia|Spinal Cord Injury	Device: Implantation of NeuroPort Arrays in the motor cortex	The primary outcome is the safety of the participant.|The secondary outcome is the efficacy of the electrodes for long-term recording of neural activity and successful control of external devices.	Michael Boninger|University of Pittsburgh	All	18 Years to 70 Years ¬† (Adult, Older Adult)	Not Applicable	5	Other	Interventional	Allocation: N/A|Intervention Model: Single Group Assignment|Masking: None (Open Label)|Primary Purpose: Other	STUDY19030235	2011-05-01	2022-12-01	2024-12-01	2011-06-02		2021-04-14	University of Pittsburgh, Pittsburgh, Pennsylvania, United States		https://ClinicalTrials.gov/show/NCT01364480
NCT02154412	Mechanisms of Arterial Hypotension in Chronic Spinal Cord Injury		Active, not recruiting	No Results Available	Spinal Cord Injury	Other: Respiratory Training	Pulmonary function test|Blood pressure change measurement|Maximum airway pressure	University of Louisville|The Craig H. Neilsen Foundation	All	18 Years and older ¬† (Adult, Older Adult)	Not Applicable	24	Other	Interventional	Allocation: Randomized|Intervention Model: Parallel Assignment|Masking: None (Open Label)|Primary Purpose: Other	11.0286 Ovechkin	2011-06-01	2025-12-01	2025-12-01	2014-06-03		2021-02-21	Frazier Rehabilitation and Neuroscience Institute, Louisville, Kentucky, United States		https://ClinicalTrials.gov/show/NCT02154412
NCT01701388	EKSO Trial: Powered Exoskeleton for Ambulation in Subjects With Spinal Cord Injury (SCI)	EKSO	Active, not recruiting	No Results Available	Spinal Cord Injuries or Similar Neurological Weakness	Device: Ekso exoskeleton	Change in 6 Minute Walk Test from baseline in distance, rate of perceived exhaustion (RPE), and oxygen uptake|Change in 10 meter walk test from baseline in gait speed|Ratio of number of steps/walking time|2 Minute Walk Test|Walk time to stand time ratio on a particular assistive device	Shirley Ryan AbilityLab|United States Department of Defense	All	18 Years to 65 Years ¬† (Adult, Older Adult)	Not Applicable	40	Other|U.S. Fed	Interventional	Allocation: N/A|Intervention Model: Single Group Assignment|Masking: None (Open Label)|Primary Purpose: Other	NU59727	2012-05-01	2022-06-01	2022-09-01	2012-10-05		2021-10-04	Rehabilitation Institute of Chicago, Chicago, Illinois, United States		https://ClinicalTrials.gov/show/NCT01701388
NCT01698138	Prevention of Bladder Dysfunction in Acute Spinal Cord Injury	BOT-SCI	Active, not recruiting	No Results Available	Spinal Cord Injuries|Urinary Bladder, Overactive	Drug: Onabotulinumtoxin A|Drug: Placebo	Presence of neurogenic detrusor overactivity during cystometry, defined as contractions with amplitudes above 40 cm H2O.|Urodynamic parameters|Quality of life (QOL) in the treated group compared to the placebo group 12 months after first treatment.|Occurrence of complications.	Oslo University Hospital|Sunnaas Rehabilitation Hospital	All	18 Years to 80 Years ¬† (Adult, Older Adult)	Phase 4	20	Other	Interventional	Allocation: Randomized|Intervention Model: Parallel Assignment|Masking: Triple (Participant, Care Provider, Investigator)|Primary Purpose: Treatment	2012/1151	2012-09-01	2020-12-20	2020-12-20	2012-10-02		2020-12-30	Sunnaas Hospital, Nesoddtangen, Norway|Oslo University Hospital, Oslo, Norway		https://ClinicalTrials.gov/show/NCT01698138
NCT01714349	Nerve Transfer After Spinal Cord Injuries		Active, not recruiting	No Results Available	Spinal Cord Injury	Procedure: Nerve Transfer	Change in upper motor strength|Change in Disabilities of Arm, Shoulder, and Hand (DASH) scores|Change in Short Form 36 (SF-36) scores|Change in Michigan Hand Questionnaire (MHQ)	Washington University School of Medicine|United States Department of Defense	All	18 Years to 65 Years ¬† (Adult, Older Adult)	Not Applicable	20	Other|U.S. Fed	Interventional	Allocation: N/A|Intervention Model: Single Group Assignment|Masking: None (Open Label)|Primary Purpose: Treatment	NTSCI -201208137	2012-10-01	2023-02-10	2023-03-01	2012-10-25		2021-02-10	Washington University, Saint Louis, Missouri, United States		https://ClinicalTrials.gov/show/NCT01714349
NCT01608438	Motor Learning in a Customized Body-Machine Interface	BMI	Active, not recruiting	No Results Available	Spinal Cord Injury	Device: Customizing the Body-Machine Interface	Change in Time to task completion from Baseline at 8 months|Change in Movement Smoothness from Baseline at 8 months|Change in Strength|Change in Mental State	Shirley Ryan AbilityLab|National Institutes of Health (NIH)	All	18 Years to 65 Years ¬† (Adult, Older Adult)	Not Applicable	157	Other|NIH	Interventional	Allocation: Non-Randomized|Intervention Model: Parallel Assignment|Masking: Single (Participant)|Primary Purpose: Supportive Care	STU00057856	2013-02-01	2022-09-01	2022-09-01	2012-05-31		2019-11-15	Shirley Ryan AbilityLab, Chicago, Illinois, United States		https://ClinicalTrials.gov/show/NCT01608438
NCT02313194	Spinal Cord Neuromodulation for SCI		Active, not recruiting	No Results Available	Cervical Spinal Cord Injury|Tetraparesis|Tetraplegia	Device: Epidural Stimulation|Drug: Buspirone	Assessment of arm/hand function	University of California, Los Angeles	All	18 Years and older ¬† (Adult, Older Adult)	Phase 1|Phase 2	12	Other	Interventional	Allocation: N/A|Intervention Model: Single Group Assignment|Masking: None (Open Label)|Primary Purpose: Treatment	12-001416	2013-07-01	2022-12-30	2022-12-30	2014-12-09		2021-11-24	UCLA, Los Angeles, California, United States		https://ClinicalTrials.gov/show/NCT02313194
NCT02089880	Comparing Functional Outcomes in Individuals Using Micro-processor Controlled Orthosis Versus Stance Control Orthosis		Active, not recruiting	No Results Available	Spinal Cord Injuries|Poliomyelitis|Post-polio Syndrome|Arthritis|Lower Motor Neurone Lesion	Device: C-brace|Device: Stance control orthosis	Six minute walk test (6MWT)|Muscle strength|Passive and active range of motion|10 meter walk test|Hill Assessment Index|Stair Assessment Index|Cross Walk Blinking Signal Test|GAITRite Data Capture|Berg Balance Scale|Functional Gait Assessment|5 times sit to stand test	Shirley Ryan AbilityLab|Otto Bock Healthcare Products GmbH	All	18 Years to 80 Years ¬† (Adult, Older Adult)	Not Applicable	24	Other|Industry	Interventional	Allocation: Randomized|Intervention Model: Crossover Assignment|Masking: None (Open Label)|Primary Purpose: Supportive Care	85951	2014-02-01	2021-12-01	2021-12-01	2014-03-18		2021-03-17	Rehabilitation Institute of Chicago, Chicago, Illinois, United States		https://ClinicalTrials.gov/show/NCT02089880
NCT02323698	Effects of Caffeine and Intermittent Hypoxia on Leg Function in Human Spinal Cord Injury		Active, not recruiting	No Results Available	Spinal Cord Injuries	Drug: Caffeine|Other: AIH|Other: Placebo|Other: SHAM	Change in overground walking speed	Spaulding Rehabilitation Hospital|Eunice Kennedy Shriver National Institute of Child Health and Human Development (NICHD)	All	18 Years to 75 Years ¬† (Adult, Older Adult)	Phase 1|Phase 2	20	Other|NIH	Interventional	Allocation: Randomized|Intervention Model: Crossover Assignment|Masking: Quadruple (Participant, Care Provider, Investigator, Outcomes Assessor)|Primary Purpose: Treatment	2017P001940b|5R01HD081274	2014-10-01	2021-03-19	2021-12-01	2014-12-23		2021-09-22	Spaulding Rehabilitation Hospital, Cambridge, Massachusetts, United States		https://ClinicalTrials.gov/show/NCT02323698
NCT02379156	Thermoregulation and Cognition During Cool Ambient Exposure in Tetraplegia		Active, not recruiting	No Results Available	Tetraplegia|Hypothermia|Mild Cognitive Impairment	Drug: Midodrine Hydrochloride|Other: Cool Temperature	Core body temperature|Cognitive performance	James J. Peters Veterans Affairs Medical Center|The Craig H. Neilsen Foundation	All	18 Years to 65 Years ¬† (Adult, Older Adult)	Phase 4	30	U.S. Fed|Other	Interventional	Allocation: Non-Randomized|Intervention Model: Parallel Assignment|Masking: None (Open Label)|Primary Purpose: Supportive Care	HAN-14-045|315696|01589	2015-04-01	2021-04-01	2021-12-01	2015-03-04		2021-06-11	Center of Excellence for the Medical Consequences of SCI, James J Peters VAMC, Bronx, New York, United States		https://ClinicalTrials.gov/show/NCT02379156
NCT02537899	Spinal Cord Injury - Assessing Tolerability and Use of Combined Rehabilitation and NeuroAiD	SATURN	Active, not recruiting	No Results Available	Spinal Cord Injury	Drug: NeuroAiD	Spinal cord injury severity based on American Spinal Injury Association Impairment Scale|Motor recovery based on American Spinal Injury Association Impairment Scale motor score|Number of patients experiencing adverse events|Sensory recovery based on American Spinal Injury Association Impairment Scale sensory score|Functional state based on Spinal Cord Independence Measure|Quality of life based on…	Moleac Pte Ltd.	All	18 Years to 65 Years ¬† (Adult, Older Adult)	Phase 4	30	Industry	Interventional	Allocation: N/A|Intervention Model: Single Group Assignment|Masking: None (Open Label)|Primary Purpose: Treatment	SATURN2015	2015-06-01	2022-01-01	2022-02-01	2015-09-02		2020-09-03	University Kebangsaan Malaysia Medical Centre, Kuala Lumpur, Wilayah Persekutuan Kuala Lumpur, Malaysia		https://ClinicalTrials.gov/show/NCT02537899
NCT02441660	Capsaicin 8% Patch for Spinal Cord Injury Neuropathic Pain	Capsaicin	Active, not recruiting	No Results Available	Spinal Cord Injuries|Neuropathic Pain	Drug: Capsaicin 8% Patch|Drug: Low Dose Capsaicin 0.04% gel	Change in pain relief with Numeric Pain Rating Scale (NPRS)|Change in pain relief with Visual Analog (VAS) pain Scale|Change in Quality of life as measured by Short Form (Sf) 36 quality of life score|Change in Functional Independence as measured by Functional Independence Measure (FIM) scores	The University of Texas Health Science Center at San Antonio	All	18 Years to 99 Years ¬† (Adult, Older Adult)	Not Applicable	10	Other	Interventional	Allocation: Randomized|Intervention Model: Crossover Assignment|Masking: Single (Participant)|Primary Purpose: Treatment	HSC20150322H	2016-04-01	2021-07-31	2022-07-01	2015-05-12		2021-08-05	Audie Lee Murphy VA Hospital, San Antonio, Texas, United States		https://ClinicalTrials.gov/show/NCT02441660
NCT02396823	Respiratory Motor Control and Blood Pressure Regulation After Spinal Cord Injury		Active, not recruiting	No Results Available	Spinal Cord Injury	Behavioral: Respiratory Muscle Training	Changes in Pulmonary Function Test outcomes|Changes in Respiratory Motor Control Assessment outcomes|Changes in Orthostatic Stress Test outcomes|Changes in cardiac output	University of Louisville|National Heart, Lung, and Blood Institute (NHLBI)	All	18 Years to 80 Years ¬† (Adult, Older Adult)	Not Applicable	60	Other|NIH	Interventional	Allocation: Non-Randomized|Intervention Model: Parallel Assignment|Masking: None (Open Label)|Primary Purpose: Health Services Research	OICB101489|R01HL103750-01A1	2016-06-01	2025-06-01	2025-06-01	2015-03-24		2021-02-21	Frazier Rehabilitation and Neuroscience Institute, Louisville, Kentucky, United States		https://ClinicalTrials.gov/show/NCT02396823
NCT02508311	Albuterol to Improve Respiratory Strength in SCI		Active, not recruiting	No Results Available	Spinal Cord Injury|Respiratory Muscle Weakness	Drug: Oral Albuterol Extended Release|Drug: Placebo	Change in Respiratory Muscle Strength	VA Office of Research and Development	All	18 Years to 80 Years ¬† (Adult, Older Adult)	Phase 4	24	U.S. Fed	Interventional	Allocation: Randomized|Intervention Model: Parallel Assignment|Masking: Quadruple (Participant, Care Provider, Investigator, Outcomes Assessor)|Primary Purpose: Treatment	B1910-P|SCH-15-011	2016-06-01	2022-03-02	2024-06-02	2015-07-24		2021-01-14	James J. Peters VA Medical Center, Bronx, NY, Bronx, New York, United States		https://ClinicalTrials.gov/show/NCT02508311
NCT02853149	A Lifestyle Intervention Targeting Enhanced Health and Function for Persons With Chronic SCI in Caregiver/Care-Receiver Relationships: Effects of Caregiver Co-Treatment	DRPP	Active, not recruiting	No Results Available	Spinal Cord Injury|Cardiovascular Diseases|Obesity	Behavioral: Spinal Cord Injury (SCI)|Behavioral: Caregiver Intervention(CCC)|Behavioral: Caregiver Control (CC)	Change from baseline in Fitness indicators as measured by Body Mass index (BMI)-|Change from baseline in Cardioendocrine and Global Cardiovascular risk by surrogate blood measures of the Homeostasis Model Assessment -Insulin Resistance (HOMA 2-IR) in SCI individuals and caregivers (unitless)|Change from baseline in Cardioendocrine and Global Cardiovascular risk by surrogate blood measures of the …	University of Miami|National Institute on Disability, Independent Living, and Rehabilitation Research	All	18 Years to 70 Years ¬† (Adult, Older Adult)	Not Applicable	44	Other|U.S. Fed	Interventional	Allocation: Randomized|Intervention Model: Parallel Assignment|Masking: Triple (Participant, Care Provider, Investigator)|Primary Purpose: Treatment	20151065|90DP0074-01-00	2016-06-26	2022-09-30	2022-09-30	2016-08-02		2021-09-16	Craig Hospital, Englewood, Colorado, United States|University of Miami- The Miami Project to Cure Paralysis, Miami, Florida, United States		https://ClinicalTrials.gov/show/NCT02853149
NCT02936453	STIMO: Epidural Electrical Simulation (EES) With Robot-assisted Rehabilitation in Patients With Spinal Cord Injury.	STIMO	Active, not recruiting	No Results Available	Spinal Cord Injury	Procedure: Device implantation	Safety and Preliminary efficacy: Walking Index for Spinal Cord Injury (WISCI II)|Safety and Preliminary efficacy: 10-Meter Walk Test (10MWT)|Safety and Preliminary efficacy: Weight Bearing Capacity (WBC).|Improvement of walking capability: Spinal Cord Independence Measure (SCIM III).|Improvement of walking capability: 6-Min Walk Test (6MWT).	Jocelyne Bloch|Ecole Polytechnique F√©d√©rale de Lausanne|Foundation Wings For Life|Centre Hospitalier Universitaire Vaudois	All	18 Years to 65 Years ¬† (Adult, Older Adult)	Not Applicable	10	Other	Interventional	Allocation: N/A|Intervention Model: Single Group Assignment|Masking: None (Open Label)|Primary Purpose: Treatment	STIMO2016	2016-07-01	2021-03-01	2021-07-01	2016-10-18		2020-11-03	Centre Hospitalier Universitaire Vaudois, Lausanne, Canton De Vaud, Switzerland		https://ClinicalTrials.gov/show/NCT02936453
NCT03004144	Impact of Assistive Forces on Activities of Daily Living	FLOAT-ADL	Active, not recruiting	No Results Available	Spinal Cord Injury	Other: FLOAT	3-dimensional kinematic analyses resulting in a detailed movement profile for each of the performed tasks	University of Zurich	All	18 Years and older ¬† (Adult, Older Adult)	Not Applicable	140	Other	Interventional	Allocation: N/A|Intervention Model: Single Group Assignment|Masking: None (Open Label)|Primary Purpose: Basic Science	2016-01093	2016-10-01	2022-05-01	2022-05-01	2016-12-28		2021-08-16	Universit√§tsklinik Balgrist, Z√ºrich, Switzerland		https://ClinicalTrials.gov/show/NCT03004144
NCT03184792	Transcutaneous Electrical Spinal Stimulation to Restore Upper Extremity Functions in Spinal Cord Injury	ADDRESS	Active, not recruiting	No Results Available	Spinal Cord Injury Cervical|Upper Extremity Dysfunction	Device: Transcutaneous spinal stimulation|Other: Physical therapy	Graded and Redefined Assessment of Strength, Sensibility and Prehension test (GRASSP test)|International Standards for Neurological Classification of Spinal Cord Injury (ISNCSCI) Examination|Grip and pinch strength|Numeric Pain Rating Scale|Penn Spasm score|Spinal Cord Independence Measure|WHO-Quality of life - BREF	University of Washington	All	21 Years to 70 Years ¬† (Adult, Older Adult)	Not Applicable	10	Other	Interventional	Allocation: Randomized|Intervention Model: Crossover Assignment|Masking: None (Open Label)|Primary Purpose: Treatment	STUDY00002985	2016-12-27	2019-12-01	2020-06-01	2017-06-14		2020-02-28	University of Washington, Seattle, Washington, United States		https://ClinicalTrials.gov/show/NCT03184792
NCT03555838	Combined Robotic Training and tDCS in Chronic SCI		Active, not recruiting	No Results Available	Spinal Cord Injuries|Tetraplegia	Other: transcranial direct current stimulation|Other: sham transcranial direct current stimulation	Change in Box and Blocks Test|Upper Extremity Motor Score|Spinal Cord Independence Measure (SCIM III)|Modified Ashworth Scale|Nine Hole Peg Test|Questionnaire of von Korff et al Grading the Severity of Chronic Pain|Quadraplegia Index of Function- Short Form	Burke Medical Research Institute|New York State Spinal Cord Injury Research Board (SCIRB)	All	18 Years to 99 Years ¬† (Adult, Older Adult)	Phase 3	13	Other	Interventional	Allocation: Randomized|Intervention Model: Parallel Assignment|Masking: Double (Participant, Outcomes Assessor)|Primary Purpose: Treatment	BRC549	2017-05-01	2019-01-01	2022-12-01	2018-06-14		2021-12-29	Burke Medical Research Institute, White Plains, New York, United States		https://ClinicalTrials.gov/show/NCT03555838
NCT02946424	Simvastatin to Prevent SCI-Induced Bone Loss		Active, not recruiting	No Results Available	Spinal Cord Injuries|Osteoporosis	Drug: Placebo Oral Capsule|Drug: Simvastatin	Change in knee bone mineral density|Change in bone volume|Change in mood|Change in pain|Satisfaction with life|Change in community reintegration|Change in motor score|Change in tibial bone strength	Craig Hospital	All	18 Years to 60 Years ¬† (Adult)	Phase 2	76	Other	Interventional	Allocation: Randomized|Intervention Model: Parallel Assignment|Masking: Triple (Participant, Investigator, Outcomes Assessor)|Primary Purpose: Prevention	SCIMS Statin	2017-07-01	2023-09-01	2023-09-30	2016-10-27		2021-12-08	Craig Hospital, Englewood, Colorado, United States		https://ClinicalTrials.gov/show/NCT02946424
NCT03167138	Micro-Fragmented Adipose Tissue (Lipogems¬Æ) Injection for Chronic Shoulder Pain in Persons With Spinal Cord Injury		Active, not recruiting	No Results Available	Shoulder Pain|Shoulder Impingement Syndrome|Rotator Cuff Impingement Syndrome|Rotator Cuff Tendinitis|Rotator Cuff Syndrome of Shoulder and Allied Disorders|Spinal Cord Injuries	Biological: Autologous micro-fragmented adipose tissue|Device: Lipogems system	Numerical Rating Scale|Wheelchair User's Shoulder Pain Index (WUSPI)|Patient Global Impression of Change|Brief Pain Inventory interference items (BPI-I7)|Physical Examination of the Shoulder Score (PESS)	Kessler Foundation	All	18 Years to 70 Years ¬† (Adult, Older Adult)	Early Phase 1	10	Other	Interventional	Allocation: N/A|Intervention Model: Single Group Assignment|Masking: None (Open Label)|Primary Purpose: Treatment	R-957-17	2017-07-14	2019-09-06	2020-02-21	2017-05-25		2020-02-17	Kessler Institute for Rehabilitation, West Orange, New Jersey, United States		https://ClinicalTrials.gov/show/NCT03167138
NCT03111277	MR Guided Focused Ultrasound for Treatment of Neuropathic Pain		Active, not recruiting	No Results Available	Severe Neuropathic Pain Due to Radiculopathy or Radicular Injury|Spinal Cord Injuries|Phantom Limb Pain	Device: Experimental: ExAblate Transcranial treatment	Incidence of Treatment related adverse events|Change in pain measurements using pain numeric rating scale|Change in pain related disability	University of Maryland, Baltimore|Focused Ultrasound Foundation|InSightec	All	21 Years to 75 Years ¬† (Adult, Older Adult)	Not Applicable	10	Other|Industry	Interventional	Allocation: N/A|Intervention Model: Single Group Assignment|Masking: None (Open Label)|Primary Purpose: Device Feasibility	HP-00068223	2017-09-15	2022-09-05	2022-12-31	2017-04-12		2021-08-30	University of Maryland School of Medicine and University of Maryland Medical Systems, Baltimore, Maryland, United States		https://ClinicalTrials.gov/show/NCT03111277
NCT03385005	Evaluating Neuromuscular Stimulation for Restoring Hand Movements		Active, not recruiting	No Results Available	Healthy Volunteers|Spinal Cord Injury Cervical|Physical and Rehabilitation Medicine	Device: Participants will receive neuromuscular electrical stimulation via an investigational (not FDA approved) neuromuscular stimulator.	The primary outcome of the study is to determine the feasibility of achieving refined hand movements through electrical stimulation of the muscles within the forearm, as assessed by visual inspection.|The primary outcome of the study is to determine the feasibility of achieving refined hand movements through electrical stimulation of the muscles within the forearm, as assessed by force sensors.	Northwell Health	All	18 Years to 65 Years ¬† (Adult, Older Adult)	Early Phase 1	8	Other	Interventional	Allocation: Non-Randomized|Intervention Model: Sequential Assignment|Masking: None (Open Label)|Primary Purpose: Device Feasibility	17-0070	2017-09-15	2020-12-07	2022-06-01	2017-12-28		2021-10-27	Northwell Health's The Feinstein Institute for Medical Research, Manhasset, New York, United States		https://ClinicalTrials.gov/show/NCT03385005
NCT03137108	Effects of Transcutaneous Spinal Cord Stimulation on Residual Voluntary Motor Control in Individuals With Incomplete Spinal Cord Injury		Active, not recruiting	No Results Available	Motor Control in Incomplete Spinal Cord Injured Persons	Device: Transcutaneous electrical spinal cord stimulation	Kinematic movement characteristics recorded with a motion capture system;	University of Zurich	All	18 Years and older ¬† (Adult, Older Adult)	Not Applicable	15	Other	Interventional	Allocation: N/A|Intervention Model: Single Group Assignment|Masking: None (Open Label)|Primary Purpose: Treatment	2017-00053	2017-10-01	2022-08-01	2022-08-01	2017-05-02		2021-07-23	Universit√§tsklinik Balgrist, Z√ºrich, Switzerland		https://ClinicalTrials.gov/show/NCT03137108
NCT03029884	Closed-loop Deep Brain Stimulation to Treat Refractory Neuropathic Pain		Active, not recruiting	No Results Available	Chronic Pain|Post Stroke Pain|Phantom Limb Pain|Spinal Cord Injuries	Device: Medtronic Activa PC+S	Visual Analog Score|Short Form 36 Health Survey|Quantitative Sensory Testing Pain Threshold|Neuropathic Pain Questionnaire	University of California, San Francisco|United States Department of Defense|National Institute of Neurological Disorders and Stroke (NINDS)	All	21 Years and older ¬† (Adult, Older Adult)	Not Applicable	10	Other|U.S. Fed|NIH	Interventional	Allocation: Randomized|Intervention Model: Crossover Assignment|Masking: Single (Participant)|Primary Purpose: Treatment	16-18617|UH3NS109556	2017-10-28	2024-06-01	2026-06-01	2017-01-24		2020-12-16	University of California, San Francisco, California, United States		https://ClinicalTrials.gov/show/NCT03029884
NCT03811301	[BrainConnexion] - Neurodevice Phase II Trial		Active, not recruiting	No Results Available	Tetraplegia|Tetraplegia/Tetraparesis|Spinal Cord Injuries|Amyotrophic Lateral Sclerosis|Motor Neuron Disease|Locked-in Syndrome|Muscular Dystrophies	Device: BrainConnexion	The number of serious adverse events (SAEs) and adverse events (AEs) reported per patient 12 months post-implantation.|The signal quality of the electrodes for long-term recording of neural signals.|Decoding accuracy per training session.|Number of successful trials per session|Time taken to complete each trial per session	National Neuroscience Institute|Institute of Microelectronics|Institute of Molecular and Cell Biology|Institute for Infocomm Research|Nanyang Technological University	All	21 Years to 70 Years ¬† (Adult, Older Adult)	Not Applicable	3	Other	Interventional	Allocation: N/A|Intervention Model: Single Group Assignment|Masking: None (Open Label)|Primary Purpose: Other	BrainConnexion	2017-11-21	2021-12-31	2021-12-31	2019-01-22		2021-03-04	National Neuroscience Institute, Singapore, Singapore		https://ClinicalTrials.gov/show/NCT03811301
NCT03308565	Adipose Stem Cells for Traumatic Spinal Cord Injury	CELLTOP	Active, not recruiting	No Results Available	Spinal Cord Injuries|Paralysis	Biological: Autologous, Adipose derived Mesenchymal Stem Cells	Incidence of acute adverse events|Incidence of delayed adverse events|Severity of adverse events|Relationship of adverse events to study drug|Incidence of serious adverse events (SAE)|Change in sensory and motor function following completion of treatment as measured by the American Spinal Injury Association (ASIA) Impairment Scale (AIS)|Change in sensory and motor function following completion of…	Allan Dietz, Ph.D.|Mayo Clinic	All	18 Years and older ¬† (Adult, Older Adult)	Phase 1	10	Other	Interventional	Allocation: N/A|Intervention Model: Single Group Assignment|Masking: None (Open Label)|Primary Purpose: Treatment	17-004621	2017-12-05	2022-11-01	2023-11-01	2017-10-12		2021-11-17	Mayo Clinic, Rochester, Minnesota, United States		https://ClinicalTrials.gov/show/NCT03308565
NCT03140501	Improving Self-Management Skills Among People With Spinal Cord Injury	MobileApp	Active, not recruiting	No Results Available	Spinal Cord Injuries|Self-Management|Mobile Application	Device: Mobile application ("app")	Goal Attainment Scaling (GAS)|Self-Efficacy for Managing Chronic Disease Scale|Spinal Cord Injury Secondary Conditions Scale|Self-Reported Healthcare Utilization|Spinal Cord Independence Measure III|American Spinal Injury Association Impairment Scale|Interpersonal Support Evaluation List (ISEL)|Technology Readiness Index|Leisure Time Physical Activity Questionnaire-SCI|Health Care Climate Questio…	University of British Columbia|The Craig H. Neilsen Foundation	All	19 Years and older ¬† (Adult, Older Adult)	Not Applicable	50	Other	Interventional	Allocation: Randomized|Intervention Model: Parallel Assignment|Masking: Single (Outcomes Assessor)|Primary Purpose: Supportive Care	440872	2018-01-08	2021-12-01	2022-12-01	2017-05-04		2021-10-07	GF Strong Rehabilitation Center, Vancouver, British Columbia, Canada		https://ClinicalTrials.gov/show/NCT03140501
NCT03624218	Outcomes After Spinal Cord Injury (OASIS)		Active, not recruiting	No Results Available	Posttraumatic Stress Disorder|Spinal Cord Injuries	Behavioral: Prolonged Exposure Therapy	The PTSD Symptom Scale - Interview for DSM-5 (PSSI-5)|The MINI International Neuropsychiatric Interview (MINI)|The Beck Depression Inventory-II (BDI-II)|Post-Traumatic Cognitions Inventory (PTCI)|Numerical Rating Scale (NRS)|Pittsburgh Sleep Quality Index Addendum for PTSD (PSQI-A)|SCI Quality of Life- Positive Affect & Well-Being - Short Form (SCI-QOL)|Posttraumatic Growth Inventory (PTGI)|Alcoh…	Baylor Research Institute	All	18 Years and older ¬† (Adult, Older Adult)	Not Applicable	30	Other	Interventional	Allocation: Randomized|Intervention Model: Parallel Assignment|Masking: None (Open Label)|Primary Purpose: Treatment	017-410	2018-02-21	2021-03-30	2021-09-30	2018-08-10		2021-07-26	Baylor Scott & White Institute for Rehabilitation, Dallas, Texas, United States		https://ClinicalTrials.gov/show/NCT03624218
NCT03113994	Statin Monotherapy for Treatment of Endocrine Metabolic Disease Risk	RoBaCO	Active, not recruiting	No Results Available	Spinal Cord Injuries|Osteoporosis|Metabolic Syndrome	Drug: Rosuvastatin Calcium|Drug: Placebo Oral Tablet|Dietary Supplement: Coenzyme Q10|Dietary Supplement: Calcium Carbonate|Dietary Supplement: Vitamin D	Change from Baseline in areal BMD of the knee region|Change from Baseline in Low density lipoprotein cholesterol (LDL)|Change from Baseline in high density lipoprotein cholesterol (HDL)|Change from Baseline in triglycerides (TG)|Change from Baseline in total cholesterol|Change from Baseline in High sensitivity C-reactive Protein (hsCRP)|Change from Baseline in Interleukin-1√ü (IL-1√ü)|Change from…	Dr. B. Catharine. Craven|The Craig H. Neilsen Foundation|Toronto Rehabilitation Institute|University Health Network, Toronto|University of Miami|Rick Hansen Institute	All	18 Years to 60 Years ¬† (Adult)	Phase 2	8	Other	Interventional	Allocation: Randomized|Intervention Model: Parallel Assignment|Masking: Quadruple (Participant, Care Provider, Investigator, Outcomes Assessor)|Primary Purpose: Treatment	2016-350642	2018-02-26	2022-12-01	2022-12-01	2017-04-14		2021-10-20	University Of Miami Miller School of Medicine, Miami, Florida, United States|University Health Network - Toronto Rehab Lyndhurst Centre, Toronto, Ontario, Canada		https://ClinicalTrials.gov/show/NCT03113994
NCT03452007	SPARC Bladder Mapping and Training Study		Active, not recruiting	No Results Available	Spinal Cord Injuries	Device: Epidural Stimulation	Changes in bladder capacity as assessed by urodynamics|Changes in bladder pressure as assessed by urodynamics|Changes in voiding efficiency as assessed by urodynamics|Changes in rectal squeeze pressure|Changes in gastrointestinal motility	University of Louisville	All	18 Years and older ¬† (Adult, Older Adult)	Not Applicable	12	Other	Interventional	Allocation: N/A|Intervention Model: Single Group Assignment|Masking: None (Open Label)|Primary Purpose: Treatment	17.1024	2018-09-12	2022-08-01	2022-12-01	2018-03-02		2021-01-26	University of Louisville, Louisville, Kentucky, United States		https://ClinicalTrials.gov/show/NCT03452007
NCT03931408	Gentamicin Bladder Instillation in Individuals With Spinal Cord Injury Having Chronic Urinary Tract Infections		Active, not recruiting	No Results Available	Neurogenic Bladder|Spinal Cord Injuries	Drug: Gentamicin Sulfate|Other: Placebo instillation (saline alone)|Other: No instillation	Incidence of urinary tract infections measured with Urinalysis and Culture|Presence of abnormal ranges of complete cell counts measured by an 8ml blood draw.|Evaluate bladder storage using Urodynamics|Evaluate bladder emptying via measurements of voiding efficiency (%) via Urodynamics assessment or uroflow (if appropriate).|Presence of bladder and kidney anatomical and morphological changes measu…	University of Louisville	All	18 Years and older ¬† (Adult, Older Adult)	Phase 2	36	Other	Interventional	Allocation: Randomized|Intervention Model: Crossover Assignment|Masking: Quadruple (Participant, Care Provider, Investigator, Outcomes Assessor)|Primary Purpose: Prevention	18.0586	2019-02-19	2022-01-16	2022-01-16	2019-04-30		2021-02-08	Frazier Rehab, Louisville, Kentucky, United States		https://ClinicalTrials.gov/show/NCT03931408
NCT03702842	Stimulation to Enhance Walking Post-SCI		Active, not recruiting	No Results Available	SCI - Spinal Cord Injury|Incomplete Spinal Cord Injury	Device: Soterix Medical tsDCS stimulator|Other: Locomotor training	Change in 10-Meter Walk Test (Interventional)|Change in Electromyogram (EMG; Immediate)|Change in 6-Minute Walk Test (Interventional)	University of Florida|National Institutes of Health (NIH)|Eunice Kennedy Shriver National Institute of Child Health and Human Development (NICHD)|Brooks Rehabilitation	All	18 Years to 65 Years ¬† (Adult, Older Adult)	Not Applicable	10	Other|NIH	Interventional	Allocation: Randomized|Intervention Model: Parallel Assignment|Masking: Single (Participant)|Primary Purpose: Treatment	IRB201801582 -N -A|NIH/NICHD 5P2CHD08685|OCR16206	2019-04-01	2021-09-02	2022-09-05	2018-10-11		2021-11-30	Brooks Rehabilitation Hospital, Jacksonville, Florida, United States		https://ClinicalTrials.gov/show/NCT03702842
NCT03834857	STENTRODE First in Human Early Feasibility Study	SWITCH	Active, not recruiting	No Results Available	Neurologic Disorder	Device: StentrodeTM	Treatment-Related Adverse Events|High fidelity and stable signals over 12 months	Synchron Medical, Inc	All	18 Years to 75 Years ¬† (Adult, Older Adult)	Not Applicable	5	Industry	Interventional	Allocation: N/A|Intervention Model: Single Group Assignment|Masking: None (Open Label)|Primary Purpose: Device Feasibility	S-01-01	2019-05-27	2021-12-01	2022-01-01	2019-02-08		2021-09-01	Melbourne Health, Melbourne, Victoria, Australia		https://ClinicalTrials.gov/show/NCT03834857
NCT04241003	Effects of the SmartDrive on Mobility, Activity and Shoulder Pain Among People With SCI Using Manual Wheelchairs		Active, not recruiting	No Results Available	Spinal Cord Injuries	Device: SmartDrive Mx2+	Change in wheelchair usage per day (time)|Change in wheelchair usage per day (distance)|Change in activity level of patient reported wheelchair use|Pain in upper extremities, WUSPI|Pain in upper extremities, ISCOS|Wheelchair Outcome Measure WhOM|Change in pain level of patient reported wheelchair use	Permobil, Inc.	All	18 Years and older ¬† (Adult, Older Adult)	Not Applicable	30	Industry	Interventional	Allocation: N/A|Intervention Model: Single Group Assignment|Masking: None (Open Label)|Primary Purpose: Supportive Care	Per2018M01	2019-06-11	2021-03-01	2021-06-01	2020-01-27		2021-01-11	Stiftelsen Spinalis, Solna, Sweden		https://ClinicalTrials.gov/show/NCT04241003
NCT03989440	AXER-204 in Participants With Chronic Spinal Cord Injury	RESET	Active, not recruiting	No Results Available	Chronic Spinal Cord Injury	Drug: AXER-204|Drug: Placebo	Incidence of treatment-emergent Adverse Events (AEs) and Serious Adverse Events (SAEs)|Area Under the Concentration-Time Curve From Time 0 to Time of the Last Measurable Concentration (AUClast) of AXER-204|Change in International Standards for Neurological Classification of SCI (ISNCSCI) Upper Extremity Motor Score (UEMS)|Change in Graded Redefined Assessment of Strength, Sensation and Prehension…	ReNetX Bio, Inc.	All	18 Years to 65 Years ¬† (Adult, Older Adult)	Phase 1|Phase 2	56	Industry	Interventional	Allocation: Randomized|Intervention Model: Parallel Assignment|Masking: Quadruple (Participant, Care Provider, Investigator, Outcomes Assessor)|Primary Purpose: Treatment	RNX-AX204-101	2019-07-16	2022-06-01	2022-06-01	2019-06-18		2021-11-10	Keck Medicine of USC, Los Angeles, California, United States|Shepherd Center, Atlanta, Georgia, United States|Shirley Ryan AbilityLab / Northwestern, Chicago, Illinois, United States|Spaulding Rehabilitation, Boston, Massachusetts, United States|The Ohio State University Wexner Medical Center, Columbus, Ohio, United States|Thomas Jefferson University, Philadelphia, Pennsylvania, United States		https://ClinicalTrials.gov/show/NCT03989440
NCT03899584	High Doses of 4-aminopyridine in Clinically Complete Chronic Spinal Cord Injury Patients.		Active, not recruiting	No Results Available	Spinal Cord Injuries|Chronic	Drug: 4-Aminopyridine|Drug: Placebo oral capsule	Changes in Sensory Function|Changes in Motor function|Changes in the functional assement of Spinal Cord Independence|Changes in the Sphincters function|Change of overall quality of life score as measured by Short Form-36 (SF-36)|Changes in Mean International Index of Erectile Function|Incidence of Treatment-Emergent Adverse Events (Safety)	Coordinaci√≥n de Investigaci√≥n en Salud, Mexico	All	18 Years to 60 Years ¬† (Adult)	Phase 3	150	Other	Interventional	Allocation: Randomized|Intervention Model: Parallel Assignment|Masking: Double (Participant, Investigator)|Primary Purpose: Treatment	2010-785-073	2019-07-17	2022-12-01	2023-12-01	2019-04-02		2021-02-21	Hospital de Especialidades, CMN Siglo XXI, Mexico City, Mexico		https://ClinicalTrials.gov/show/NCT03899584
NCT04041063	Rehabilitation and Cortical Remodeling After Surgical Intervention for Spinal Cord Injury		Active, not recruiting	No Results Available	Spinal Cord Injuries|Tetraplegia|Cervical Spinal Cord Injury	Device: Upper limb robotic training|Procedure: Nerve transfer surgery	Change in Box and Blocks test score|Upper extremity motor score (UEMS)|Spinal Cord Independence Measure (SCIM III)|Modified Ashworth Scale|Single pulse transcranial magnetic stimulation	Burke Medical Research Institute|Massachusetts General Hospital	All	18 Years to 50 Years ¬† (Adult)	Phase 2	8	Other	Interventional	Allocation: Randomized|Intervention Model: Crossover Assignment|Masking: Single (Outcomes Assessor)|Primary Purpose: Treatment	SCI_nerve_transfer_robotics	2019-07-26	2022-12-31	2023-12-31	2019-08-01		2021-03-30	Burke Neurological Institute, White Plains, New York, United States		https://ClinicalTrials.gov/show/NCT04041063
NCT04059718	SCI Thrive: Efficacy of a Peer-led Online Self-Management Program	SCIThrive	Active, not recruiting	No Results Available	Spinal Cord Injuries	Behavioral: SCI Thrive Peer-Led Online Self-Management Program	Change in Perceived Quality of Life Scale (PQOL)|Change in Self-Efficacy for Managing Chronic Disease 6-item Scale (SMCD)|Change in Life Space Assessment (LSA)|Change in the Craig Handicap Assessment and Reporting Technique (CHART) Short Form	University of Washington	All	18 Years and older ¬† (Adult, Older Adult)	Not Applicable	250	Other	Interventional	Allocation: Randomized|Intervention Model: Parallel Assignment|Masking: None (Open Label)|Primary Purpose: Treatment	STUDY00006621	2019-10-01	2021-07-24	2021-10-24	2019-08-16		2021-07-07	Northwest Regional Spinal Cord Injury System: University of Washington, Seattle, Washington, United States		https://ClinicalTrials.gov/show/NCT04059718
NCT04412447	Training for Persons With Complete SCI for FES Cycling: a Case Series		Active, not recruiting	No Results Available	Spinal Cord Injuries	Device: Functional Electrical Stimulation	Change in Maximum Cycling-Distance in [m]|Change in Maximum Cycling-Speed in [km/h]|Change in Average Cycling-Speed in [km/h]|Change in Maximum Cycling-duration in [hh:mm:ss]|Change in Maximum Pedaling-Cadence in [RPM]|Change in Average Pedaling-Cadence in [RPM]|Ability to cycle 1200m in less than 8min|Change of blood pressure during training|Change of heart rate during training|Maximum heart rat…	Centre de R√©√©ducation et R√©adaptation Fonctionnelle La Ch√¢taigneraie|Institut National de Recherche en Informatique et en Automatique|Universit√© Montpellier	All	18 Years to 65 Years ¬† (Adult, Older Adult)	Not Applicable	2	Other	Interventional	Allocation: N/A|Intervention Model: Single Group Assignment|Masking: None (Open Label)|Primary Purpose: Basic Science	2019-A00808-49	2019-10-01	2020-06-01	2020-09-01	2020-06-02		2020-06-02	Centre de R√©√©ducation et de R√©adaptation Fonctionnelle La Ch√¢taigneraie, Menucourt, France		https://ClinicalTrials.gov/show/NCT04412447
NCT03963843	Internet-delivered Cognitive Behavioural Therapy for Persons With Spinal Cord Injury		Active, not recruiting	No Results Available	Spinal Cord Injuries|Anxiety|Depression	Behavioral: Guided ICBT|Other: SCI rehabilitation mental health education	Change in depression|Change in anxiety|Change in psychological distress|Change in disability|Change in quality of life symptoms: SCI-QoL-SF|Change in pain: Brief Pain Inventory-Short Form|Treatment credibility|Treatment satisfaction: Internet-CBT Treatment Satisfaction Measure	University of Regina|Lawson Health Research Institute	All	18 Years and older ¬† (Adult, Older Adult)	Not Applicable	122	Other	Interventional	Allocation: Randomized|Intervention Model: Parallel Assignment|Masking: Single (Outcomes Assessor)|Primary Purpose: Treatment	2019-020	2019-10-18	2021-11-01	2022-04-30	2019-05-28		2021-12-16	Lawson Health Research Institute, London, Ontario, Canada|Online Therapy Unit, University of Regina, Regina, Saskatchewan, Canada		https://ClinicalTrials.gov/show/NCT03963843
NCT04141891	Advancing Understanding of Transportation Options	AUTO	Active, not recruiting	No Results Available	Diabetic Retinopathy|Macular Degeneration|Glaucoma|Retinitis Pigmentosa|Vision Disorders|Acute Coronary Syndrome|Implantable Defibrillator User|Congestive Heart Failure|Hypertrophic Obstructive Cardiomyopathy|Orthostatic Hypotension|Syncope|Presyncope|Narcolepsy|Dementia|Multiple Sclerosis|Parkinson Disease|Brain Injuries|Spinal Cord Injuries|Stroke|Vertigo|Dizziness|Seizures|Substance Use|Insuli…	Behavioral: Driving Decision Aid|Behavioral: Older Drivers Website	Decisional Conflict Scale (DCS) Scores at Day 0 (Post-intervention)|Values Clarity Subscale Score at Day 0 (Post-intervention)|Older adult driving safety knowledge scores as assessed by true/false questions at Day 0 (Post-intervention)|Decision Self Efficacy score at Day 0 (Post-intervention)|Change in Patient-Reported Outcomes Measurement Information System (PROMIS) 4-item depression score|Chang…	University of Colorado, Denver|National Institute on Aging (NIA)	All	18 Years and older ¬† (Adult, Older Adult)	Not Applicable	528	Other|NIH	Interventional	Allocation: Randomized|Intervention Model: Parallel Assignment|Masking: Single (Outcomes Assessor)|Primary Purpose: Health Services Research	19-0059|R01AG059613	2019-12-12	2023-08-01	2023-08-01	2019-10-28		2021-07-14	University of California, San Diego, La Jolla, California, United States|CU Anschutz Medical Center, Aurora, Colorado, United States|Indiana University, Indianapolis, Indiana, United States		https://ClinicalTrials.gov/show/NCT04141891
NCT04390087	Effect of Upper-body Rowing on Cardiometabolic Risk in Spinal Cord Injured Wheelchair Users		Active, not recruiting	No Results Available	Spinal Cord Injuries|Exercise Training	Other: Exercise	fasting insulin|Arterial blood pressure|Body mass|Heart rate variability (HRV)|Vascular structure|Fasting blood glucose|Cardiorespiratory fitness level|Shoulder pain|Free-living physical activity|Health-related quality of life (HRQOL)|body mass index|Waist Circumference|Conduit artery function|Resistance vessel function|Vascular function|Long-term blood glucose|HDL cholesterol|LDL cholesterol|Tri…	Aalborg University|Aage og Johanne Louis-Hansens Fond	All	18 Years to 65 Years ¬† (Adult, Older Adult)	Not Applicable	30	Other	Interventional	Allocation: Randomized|Intervention Model: Parallel Assignment|Masking: None (Open Label)|Primary Purpose: Basic Science	N-20190053	2020-01-11	2023-03-01	2024-12-01	2020-05-15		2021-07-21	Aalborg University, Aalborg, Denmark		https://ClinicalTrials.gov/show/NCT04390087
NCT04550117	Intraspinal Pressure Monitoring for Acute Traumatic Spinal Cord Injury: A Validation Study		Active, not recruiting	No Results Available	Spinal Cord Injuries|Spine Injury	Procedure: Insertion of Intraspinal pressure monitor	Derivation of parameters for optimal spinal cord perfusion pressure using intraspinal pressure data|Measurement of the accuracy of probe placement in relation to the site of injury|Measure the correlation between spinal cord perfusion pressure and the American Spinal Injury Association (ASIA) Impairment scale, Quality of Life Index and Spinal Cord Independence Measure score.|Record rates of adver…	University of Manitoba|Health Sciences Centre Foundation, Manitoba	All	18 Years to 70 Years ¬† (Adult, Older Adult)	Not Applicable	20	Other	Interventional	Allocation: N/A|Intervention Model: Single Group Assignment|Masking: None (Open Label)|Primary Purpose: Other	HS23117 9B2019:075)	2020-06-23	2022-10-31	2022-12-31	2020-09-16		2020-09-16	Health Sciences Centre, Winnipeg, Manitoba, Canada		https://ClinicalTrials.gov/show/NCT04550117
NCT04627168	Trancutaneous Abdominal Stimulation on Bowel Function.		Active, not recruiting	No Results Available	Spinal Cord Injuries|Constipation	Device: Non-invasive, surface electrical stimulation device, DS5 Digitimer	Duration of the occurrence of first stool|Total defecation time (duration)	Amol Soin, M.D., MBA|Ohio Pain Clinic	All	18 Years and older ¬† (Adult, Older Adult)	Not Applicable	20	Other	Interventional	Allocation: Non-Randomized|Intervention Model: Parallel Assignment|Masking: None (Open Label)|Primary Purpose: Treatment	MM 100-1	2020-10-07	2022-04-30	2023-02-28	2020-11-13		2021-11-16	Ohio Pain Clinic, Dayton, Ohio, United States		https://ClinicalTrials.gov/show/NCT04627168
NCT04123847	Standing, Stepping and Voluntary Movement Spinal Cord Epidural Stimulation		Active, not recruiting	No Results Available	Spinal Cord Injuries	Other: Standing and Stepping|Device: Standing, Stepping and Voluntary Movement with spinal cord Epidural Stimulation	Change from baseline of lower extremity independence time during 10 min standing bout after 160 sessions (1 year)|Change from baseline of stepping independence time during 6 min stepping bout after 160 sessions (1 year)|Change from baseline of number of consecutive hip flexion repetitions performed within one minute after 160 sessions (1 year)|Change from baseline in resting metabolic rate after …	Susan Harkema|The Leona M. and Harry B. Helmsley Charitable Trust|University of Louisville	All	18 Years and older ¬† (Adult, Older Adult)	Not Applicable	16	Other	Interventional	Allocation: N/A|Intervention Model: Single Group Assignment|Masking: None (Open Label)|Primary Purpose: Basic Science	17.1024 MC-PP-2	2020-11-02	2024-11-01	2024-11-01	2019-10-11		2021-07-20	University of Louisville, Louisville, Kentucky, United States		https://ClinicalTrials.gov/show/NCT04123847
NCT04205019	Safety Stem Cells in Spinal Cord Injury	SSCiSCI	Active, not recruiting	No Results Available	Spinal Cord Injuries	Biological: Neuro-Cells	Characterize and confirm safety of intrathecal administration of Neuro-Cells by ISNCSCI checklist|Characterize and confirm safety of intrathecal administration of Neuro-Cells assessed by blood|Characterize and confirm safety of intrathecal administration of Neuro-Cells assessed by urine|Characterize and confirm safety of intrathecal administration of Neuro-Cells by adverse events|The effect of la…	Neuroplast	All	18 Years to 40 Years ¬† (Adult)	Phase 1	10	Industry	Interventional	Allocation: N/A|Intervention Model: Single Group Assignment|Masking: None (Open Label)|Primary Purpose: Treatment	A2019SCI04	2020-11-14	2021-06-18	2023-04-01	2019-12-19		2021-11-18	Hospital Nacional de Parapl√©jicos, Toledo, Castilla La Mancha, Spain		https://ClinicalTrials.gov/show/NCT04205019
NCT05063617	SCI Step Together: Improving Physical Activity Participation Among Individuals With SCI Who Ambulate		Active, not recruiting	No Results Available	Spinal Cord Injuries	Device: SCI Step Together	Recruitment rate|Eligibility rate|Retention rate|Adherence rate|Costs|Staff preparation time|Number of adverse events|Compliance|Number of log ins|Duration of log ins|Qualitative interview|Basic Psychological Needs - The Psychological Need Satisfaction in Exercise Scale.|Social Support - Sallis' social support questionnaire|Autonomous and Controlled Motivation - The Treatment Self-Regulation for …	University of British Columbia|Curatio Networks Inc.	All	19 Years and older ¬† (Adult, Older Adult)	Not Applicable	21	Other	Interventional	Allocation: Randomized|Intervention Model: Parallel Assignment|Masking: None (Open Label)|Primary Purpose: Supportive Care	SCIStepTogether|H21-01279	2021-07-29	2021-10-01	2021-12-01	2021-10-01		2021-10-22	University of British Columbia Okanagan, Kelowna, British Columbia, Canada	Study Protocol and Statistical Analysis Plan, https://ClinicalTrials.gov/ProvidedDocs/17/NCT05063617/Prot_SAP_000.pdf|"Informed Consent Form", https://ClinicalTrials.gov/ProvidedDocs/17/NCT05063617/ICF_001.pdf	https://ClinicalTrials.gov/show/NCT05063617
NCT00004445	Study of an Implantable Functional Neuromuscular Stimulation System for Patients With Spinal Cord Injuries		Completed	Has Results	Spinal Cord Injury	Procedure: Surgery|Device: IRS-8	Standing Performance|Distribution of Body Weight Through the Legs and Arms While Standing	Case Western Reserve University	All	18 Years and older ¬† (Adult, Older Adult)	Not Applicable	18	Other	Interventional	Allocation: N/A|Intervention Model: Single Group Assignment|Masking: None (Open Label)|Primary Purpose: Treatment	199/13455|CWRU-FDR001244	1996-09-01	2009-09-01	2016-12-31	1999-10-19	2019-07-22	2019-08-20	Case Western Reserve University, Cleveland, Ohio, United States|MetroHealth System, Cleveland, Ohio, United States		https://ClinicalTrials.gov/show/NCT00004445
NCT00010374	Electrical Activation of The Diaphragm for Ventilatory Assist		Completed	Has Results	Spinal Cord Injury|Quadriplegia	Device: NeuRx DPS	Enrolled Subjects Achieve Clinically Acceptable Tidal Volume Sustained Over a Continuous 4 Hour Period.|Achieve Clinically Acceptable Basal Metabolic Requirement of Tidal Volume Measured in ml During Chronic Stimulation.|Number of Patients That Use NeuRx DPS to Breathe Without the Assistance of a Mechanical Ventilator for 24 Continuous Hours a Day	Synapse Biomedical|University Hospitals Cleveland Medical Center|Shepherd Center, Atlanta GA	All	18 Years and older ¬† (Adult, Older Adult)	Not Applicable	54	Industry|Other	Interventional	Allocation: N/A|Intervention Model: Single Group Assignment|Masking: None (Open Label)|Primary Purpose: Treatment	CLIN 20-0000-0009	2000-02-01	2008-10-01	2008-10-01	2001-02-02	2020-07-15	2020-08-18	Craig Hospital, Englewood, Colorado, United States|Shepherd Center, Atlanta, Georgia, United States|University Hospital Of Cleveland, Cleveland, Ohio, United States|The Methodist Hospital, Houston, Texas, United States|Vancouver CoastHealth, Vancouver, British Columbia, Canada		https://ClinicalTrials.gov/show/NCT00010374
NCT00281463	Impact of Pushrim Activated Power Assist Wheelchairs on Mobility Among People With Tetraplegia		Completed	Has Results	Wheelchair Users	Device: Pushrim Activated Power Assist	Oxygen Consumption	VA Pittsburgh Healthcare System	All	18 Years to 65 Years ¬† (Adult, Older Adult)	Not Applicable	45	U.S. Fed	Interventional	Allocation: N/A|Intervention Model: Single Group Assignment|Masking: None (Open Label)|Primary Purpose: Basic Science	01103, 010842|H133N000019	2001-11-01	2007-03-01	2008-01-01	2006-01-24	2014-11-18	2014-11-18	Human Engineering Research Laboratories, Pittsburgh, Pennsylvania, United States		https://ClinicalTrials.gov/show/NCT00281463
NCT00047619	Enhancement of Pressure Healing With Pulsatile Lavage		Completed	Has Results	Spinal Cord Injury	Procedure: Pulsatile Lavage|Other: sham pulsatile lavage	Pressure Ulcer Geometry|Pressure Ulcer Volume Measurement	US Department of Veterans Affairs|VA Office of Research and Development	All	18 Years and older ¬† (Adult, Older Adult)	Phase 2	28	U.S. Fed	Interventional	Allocation: Randomized|Intervention Model: Parallel Assignment|Masking: Quadruple (Participant, Care Provider, Investigator, Outcomes Assessor)|Primary Purpose: Prevention	A2803-R	2002-06-01	2008-05-01	2008-05-01	2002-10-10	2015-10-05	2015-10-05	VA Medical Center, Cleveland, Cleveland, Ohio, United States		https://ClinicalTrials.gov/show/NCT00047619
NCT01683838	Safety and Efficacy of Oral Fampridine-Sustained Release (SR) for the Treatment of Spasticity Resulting From Spinal Cord Injury		Completed	Has Results	Spinal Cord Injury|Muscle Spasticity	Drug: Fampridine-SR|Drug: Placebo	Double-blind Change From Baseline in Ashworth Score Evaluating Spasticity|Double-blind Change From Baseline in Mean Subject's Global Impression (SGI) Scores|Double-blind Change From Baseline in Mean Spasm Frequency/Severity Scores|Double-blind Change From Baseline in Mean Clinician's Global Impression (CGI) Scores|Stable-dose Change From Baseline in Mean American Spinal Injury Association(ASIA) T…	Acorda Therapeutics	All	18 Years to 70 Years ¬† (Adult, Older Adult)	Phase 3	204	Industry	Interventional	Allocation: Randomized|Intervention Model: Parallel Assignment|Masking: Double (Participant, Investigator)|Primary Purpose: Treatment	SCI-F302	2002-06-01	2003-11-01	2004-02-01	2012-09-12	2014-02-05	2017-08-25	UAB School of Medicine, 190 Spain Rehab Center, Birmingham, Alabama, United States|Long Beach VA Medical Center, Long Beach, California, United States|University of California, Davis, Sacramento, California, United States|Santa Clara Valley Medical Center, San Jose, California, United States|Craig Hospital, Englewood, Colorado, United States|Hospital for Special Care, New Britain, Connecticut, Un…		https://ClinicalTrials.gov/show/NCT01683838
NCT00041717	Safety and Efficacy of Oral Fampridine-SR for the Treatment of Spasticity Resulting From Spinal Cord Injury		Completed	Has Results	Spinal Cord Injury|Muscle Spasticity	Drug: Fampridine-SR|Other: Placebo	Double-blind Change From Baseline in Ashworth Score Evaluating Spasticity|Double-blind Change From Baseline in Subject's Global Impression (SGI) of Treatment	Acorda Therapeutics	All	18 Years to 70 Years ¬† (Adult, Older Adult)	Phase 3	213	Industry	Interventional	Allocation: Randomized|Intervention Model: Parallel Assignment|Masking: Double (Participant, Investigator)|Primary Purpose: Treatment	SCI-F301	2002-07-01	2004-02-01	2004-05-01	2002-07-16	2013-05-31	2020-01-14	Lakeshore Rehabilitation Hospital, Birmingham, Alabama, United States|Barrow Neurological Institute, Phoenix, Arizona, United States|Baptist Medical Center, Little Rock, Arkansas, United States|VA Palo Alto Health Care System, Palo Alto, California, United States|Neuro-Therapeutics, Inc, Pasadena, California, United States|Neurology Associates, P.A., Wilmington, Delaware, United States|National R…		https://ClinicalTrials.gov/show/NCT00041717
NCT01606202	A Study of Cannabis Based Medicine Extracts and Placebo in Patients With Pain Due to Spinal Cord Injury		Completed	Has Results	Pain	Drug: GW-1000-02|Drug: Placebo	Change From Baseline in Mean Central Neuropathic Pain 11-Point Numerical Rating Scale Scores at the End of Treatment (up to 51 Days).|Change From Baseline in the Mean Percentage of Days on Which Escape Medication Was Used at the End of Treatment|Change From Baseline in Mean Spasm Severity Numerical Rating Scale Score at the End of Treatment|Change From Baseline in the Percentage of Days on Which …	GW Pharmaceuticals Ltd.	All	18 Years and older ¬† (Adult, Older Adult)	Phase 3	116	Industry	Interventional	Allocation: Randomized|Intervention Model: Parallel Assignment|Masking: Quadruple (Participant, Care Provider, Investigator, Outcomes Assessor)|Primary Purpose: Treatment	GWSC0101	2002-07-01	2005-01-01	2005-01-01	2012-05-25	2012-09-28	2012-09-28	The Royal National Orthopaedic Hospital, Middlesex, United Kingdom		https://ClinicalTrials.gov/show/NCT01606202
NCT01435798	Clinical Neuropharmacology of Pain in Spinal Cord Injury- Dextromethorphan Dose Response Clinical Trial		Completed	Has Results	Central Neuropathic Pain|Allodynia|Spinal Cord Injury	Drug: Dextromethorphan	Mean Pain Intensity (Percent Change From Baseline)|Satisfaction	Brigham and Women's Hospital|National Institute of Neurological Disorders and Stroke (NINDS)	All	18 Years to 70 Years ¬† (Adult, Older Adult)	Phase 2	26	Other|NIH	Interventional	Allocation: Randomized|Intervention Model: Crossover Assignment|Masking: Quadruple (Participant, Care Provider, Investigator, Outcomes Assessor)|Primary Purpose: Treatment	R01NS041503	2003-04-01	2008-01-01	2008-01-01	2011-09-19	2017-04-04	2017-04-04	Translational Pain Research, Brigham and Women's Hospital, Boston, Massachusetts, United States		https://ClinicalTrials.gov/show/NCT01435798
NCT02218203	Clinical Neuropharmacology of Pain in Spinal Cord Injury- Dextromethorphan/Lidocaine Combination Clinical Trial		Completed	Has Results	Central Neuropathic Pain|Allodynia|Spinal Cord Injury	Drug: Dextromethorphan|Drug: Lidocaine|Drug: Placebo (Dextromethorphan)|Drug: Placebo (Lidocaine)	Percent Change in Peak Pain Intensity	Brigham and Women's Hospital|National Institute of Neurological Disorders and Stroke (NINDS)	All	18 Years to 70 Years ¬† (Adult, Older Adult)	Phase 2	26	Other|NIH	Interventional	Allocation: Randomized|Intervention Model: Factorial Assignment|Masking: Quadruple (Participant, Care Provider, Investigator, Outcomes Assessor)|Primary Purpose: Treatment	RO1NS41503-2	2003-04-01	2008-01-01	2008-01-01	2014-08-18	2018-03-22	2018-03-22	Translational Pain Research, Brigham and Women's Hospital, Boston, Massachusetts, United States		https://ClinicalTrials.gov/show/NCT02218203
NCT00237770	Prevention of Low Blood Pressure in Persons With Tetraplegia		Completed	Has Results	Hypotension|Spinal Cord Injury	Drug: N-Nitro L-arginine-methylester (L-NAME)|Procedure: Head-up Tilt maneuver	Systolic Blood Pressure During Head-up Tilt	US Department of Veterans Affairs|VA Office of Research and Development	All	18 Years to 65 Years ¬† (Adult, Older Adult)	Phase 2|Phase 3	16	U.S. Fed	Interventional	Allocation: Non-Randomized|Intervention Model: Crossover Assignment|Masking: None (Open Label)|Primary Purpose: Treatment	B3600-R	2003-06-01	2010-06-01	2010-06-01	2005-10-12	2014-05-19	2014-05-19	VA Medical Center, Bronx, Bronx, New York, United States		https://ClinicalTrials.gov/show/NCT00237770
NCT00266864	Testosterone Replacement Therapy in Chronic Spinal Cord Injury		Completed	Has Results	Spinal Cord Injury|Hypogonadism	Drug: Testosterone Transdermal System (Androderm 5 mg patch)	Dual Energy X-ray Absorptiometry (DXA) Assessment of Lean Tissue Mass (LTM)|Resting Energy Expenditure	VA Office of Research and Development|Kessler Institute for Rehabilitation	Male	18 Years to 49 Years ¬† (Adult)	Phase 2|Phase 3	31	U.S. Fed|Industry	Interventional	Allocation: Non-Randomized|Intervention Model: Parallel Assignment|Masking: None (Open Label)|Primary Purpose: Treatment	B2648-C	2003-08-01	2012-08-01	2012-12-01	2005-12-19	2014-04-07	2017-11-01	Kessler Institute for Rehabilitation, West Orange, New Jersey, United States|James J. Peters VA Medical Center, The Bronx, New York, United States		https://ClinicalTrials.gov/show/NCT00266864
NCT00594178	Palliative Strategies in Spinal Cord Injury (SCI)		Completed	Has Results	Spinal Cord Injury	Device: Motorized bicycle exercise training	Muscle Mass Via Dual-Energy X-ray Absortiometry (DEXA)Scan Data|Bone Density Via Dual-Energy X-ray Absortiometry (DEXA) Scan	University of Arkansas	All	18 Years to 70 Years ¬† (Adult, Older Adult)	Not Applicable	17	Other	Interventional	Allocation: Non-Randomized|Intervention Model: Single Group Assignment|Masking: None (Open Label)|Primary Purpose: Treatment	24179|PRN # 12903 NIH	2003-10-01	2008-07-01	2010-09-01	2008-01-15	2011-01-13	2011-01-13	Center for Translational Neuroscience #847, Little Rock, Arkansas, United States		https://ClinicalTrials.gov/show/NCT00594178
NCT00116337	Spinal Cord Stimulation to Restore Cough		Completed	Has Results	Spinal Cord Injuries|Spinal Cord Diseases|Paralysis|Central Nervous System Diseases|Cough|Trauma, Nervous System|Wounds and Injuries	Procedure: Spinal Cord Stimulation to restore cough|Device: Expiratory Muscle Stimulator	Effectiveness of Expiratory Muscle Activation to Generate Large Airway Pressures Characteristic of Normal Cough.|Effectiveness of Expiratory Muscle Activation to Generate High Peak Airflows Characteristic of Normal Cough.|Incident of Acute Respiratory Tract Infections|Trained Caregiver Support for Secretion Clearance	MetroHealth Medical Center	All	18 Years to 70 Years ¬† (Adult, Older Adult)	Not Applicable	17	Other	Interventional	Allocation: N/A|Intervention Model: Single Group Assignment|Masking: None (Open Label)|Primary Purpose: Treatment	IRB98-00091|IRB 98-00091|278855	2004-09-30	2017-10-10	2017-10-31	2005-06-29	2020-04-13	2020-05-04	MetroHealth Medical Center, Cleveland, Ohio, United States	Study Protocol, https://ClinicalTrials.gov/ProvidedDocs/37/NCT00116337/Prot_000.pdf|"Statistical Analysis Plan", https://ClinicalTrials.gov/ProvidedDocs/37/NCT00116337/SAP_001.pdf|"Informed Consent Form", https://ClinicalTrials.gov/ProvidedDocs/37/NCT00116337/ICF_002.pdf	https://ClinicalTrials.gov/show/NCT00116337
NCT00224029	A Study Evaluating Oxybutynin in Patients With Neurogenic Overactive Bladder Associated With a Neurological Condition		Completed	Has Results	Detrusor Hyperreflexia	Drug: Oxybutynin transdermal system	Average Number of Catheterizations Without Leaking Per Day|Patch Adhesion|Urodynamic Measurements|Urinary Leakage and Catheterization Data	Watson Pharmaceuticals	All	18 Years and older ¬† (Adult, Older Adult)	Phase 4	24	Industry	Interventional	Allocation: Non-Randomized|Intervention Model: Single Group Assignment|Masking: None (Open Label)|Primary Purpose: Treatment	OXY0401	2004-12-01	2005-12-01	2008-05-01	2005-09-22	2010-04-30	2010-04-30	Atlanta, Georgia, United States|Bronx, New York, United States|Chapel Hill, North Carolina, United States|Charlotte, North Carolina, United States|Dallas, Texas, United States|Houston, Texas, United States		https://ClinicalTrials.gov/show/NCT00224029
NCT00127439	Effects of Robotic Versus Manually-Assisted Locomotor Training for Individuals With Incomplete Spinal Cord Injury	DE	Completed	Has Results	Spinal Cord Injuries	Procedure: Manually Assisted Locomotor Training|Other: Robotic Assisted Locomotor Training	Self Selected Velocity on Treadmill|Stepping: Foot Trajectory Toe-Off|Stepping: Foot Trajectory Toe-off % Cycle|Foot Trajectory Initial Contact|Foot Trajectory Range (Toe Off to Heel Strike)|Propulsion: Propulsive Impulse|Kinematics: Minimum Thigh Angle|Kinematics: Minimum Hip Angle - Extension|Kinematics: Trunk Angle Mid-Stance	VA Office of Research and Development	All	18 Years and older ¬† (Adult, Older Adult)	Not Applicable	19	U.S. Fed	Interventional	Allocation: Randomized|Intervention Model: Parallel Assignment|Masking: None (Open Label)|Primary Purpose: Treatment	B4024-I	2005-06-01	2009-04-01	2009-04-01	2005-08-05	2018-01-24	2018-01-24	North Florida/South Georgia Veterans Health System, Gainesville, Florida, United States		https://ClinicalTrials.gov/show/NCT00127439
NCT00221117	Benefits of Applying Neuroprosthesis to Improve Grasping and Reaching in Spinal Cord Injury Patients		Completed	Has Results	Spinal Cord Injuries	Device: Neuroprosthesis-FES Therapy|Other: Conventional Ocupational Therapy (COT)	Functional Independence Measure (FIM)|Rehabilitation Engineering Laboratory Hand Function Test(REL Test)|Spinal Cord Independence Measure (SCIM).	Toronto Rehabilitation Institute|Christopher Reeve Paralysis Foundation|The Physicians' Services Incorporated Foundation	All	18 Years and older ¬† (Adult, Older Adult)	Not Applicable	22	Other	Interventional	Allocation: Randomized|Intervention Model: Parallel Assignment|Masking: Single (Outcomes Assessor)|Primary Purpose: Treatment	TRI REB #02-032	2005-08-01	2010-09-01	2010-09-01	2005-09-22	2017-11-20	2018-07-24			https://ClinicalTrials.gov/show/NCT00221117
NCT00248807	A Study of Blood Pressure and Blood Supply to the Brain in Persons With a Spinal Cord Injury.		Completed	Has Results	Orthostatic Hypotension|Spinal Cord Injuries	Drug: 1.25 mg enalaprilat IV|Other: Head up tilt (HUT)	Systolic Blood Pressure|Cerebral Blood Flow	US Department of Veterans Affairs|VA Office of Research and Development	All	18 Years to 65 Years ¬† (Adult, Older Adult)	Not Applicable	30	U.S. Fed	Interventional	Allocation: Non-Randomized|Intervention Model: Parallel Assignment|Masking: None (Open Label)|Primary Purpose: Health Services Research	B3346-V|00517	2005-10-01	2009-05-01	2012-04-01	2005-11-04	2014-06-23	2014-06-23	VA Medical Center, Bronx, Bronx, New York, United States		https://ClinicalTrials.gov/show/NCT00248807
NCT00291317	The Effect of FES on Children With Spinal Cord Injury		Completed	Has Results	Spinal Cord Injury	Device: RT 300-P FES Cycle	Change in Pediatric Quality of Life Inventory Version 4.0 (PedsQL 4.0)Score.|Change in Bone Mineral Density Measured Via DEXA Scan	Children's Specialized Hospital|University of Medicine and Dentistry of New Jersey	All	4 Years to 21 Years ¬† (Child, Adult)	Not Applicable	6	Other	Interventional	Allocation: N/A|Intervention Model: Single Group Assignment|Masking: None (Open Label)|Primary Purpose: Treatment	5532	2006-01-01	2008-09-01	2011-01-01	2006-02-14	2012-08-13	2012-08-13			https://ClinicalTrials.gov/show/NCT00291317
NCT00117806	Spinal Cord Injury Vocational Integration Program (SCI-VIP)	SCI-VIP	Completed	Has Results	Spinal Cord Injuries	Behavioral: Arm 1|Behavioral: Arm 2	Competitive Employment-Total Jobs|Competitive Employment-Participants With Competitive Employment|Competitive Employment-Percentage of Participants With Competitive Employment	VA Office of Research and Development	All	18 Years to 65 Years ¬† (Adult, Older Adult)	Not Applicable	249	U.S. Fed	Interventional	Allocation: Randomized|Intervention Model: Parallel Assignment|Masking: None (Open Label)|Primary Purpose: Treatment	B3773-R	2006-04-01	2011-09-01	2011-09-01	2005-07-08	2015-01-01	2016-03-03	James A. Haley Veterans' Hospital, Tampa, FL, Tampa, Florida, United States|VA Medical Center, St Louis, St Louis, Missouri, United States|VA Medical Center, Cleveland, Cleveland, Ohio, United States|VA North Texas Health Care System Dallas VA Medical Center, Dallas, TX, Dallas, Texas, United States|Michael E. DeBakey VA Medical Center (152), Houston, Texas, United States		https://ClinicalTrials.gov/show/NCT00117806
NCT00318591	Comparative Study of Intermittent Catheters and Occurrence of Urinary Tract Infections		Completed	Has Results	Urinary Tract Infections	Device: SpeediCath|Device: Conveen Uncoated	Occurrence of Symptomatic Urinary Tract Infections (UTIs)|UTIs With Bacteriuria >=100 Colony Forming Units (CFU)/ml|Nurse Evaluation of Catheters - Overall Satisfaction|Patient or Caregiver's Evaluation of Catheters - Overall Satisfaction|Nurse Time Spent on Catheterization Procedure|Device-related or Possibly Device-related AEs|Number of Participants With One or More Urinary Tract Infection	Coloplast A/S	All	18 Years and older ¬† (Adult, Older Adult)	Not Applicable	219	Industry	Interventional	Allocation: Randomized|Intervention Model: Parallel Assignment|Masking: None (Open Label)|Primary Purpose: Prevention	DK046CC	2006-04-01	2009-10-01	2009-10-01	2006-04-27	2011-05-25	2021-02-10	Rancho Los Amigos National Rehabilitation Center, Downey, California, United States|Santa Clara Valley Medical Center, San Jose, California, United States|Craig Hospital, Englewood, Colorado, United States|University of Miami, Miami, Florida, United States|Shepherd Center, Atlanta, Georgia, United States|Boston Medical School, Boston, Massachusetts, United States|University of Michigan Helaths Sy…		https://ClinicalTrials.gov/show/NCT00318591
NCT00320281	Investigating Botulinum Toxin A to Treat Acute Neck/Upper Shoulder Pain Following a New Spinal Cord Injury.		Completed	Has Results	Spinal Cord Injury|Pain	Drug: botulinum toxin A|Other: placebo	Numerical Rating Scale-NRS|Brief Pain Inventory-Short Form - Interference Score	Craig Hospital|The Craig H. Neilsen Foundation|Allergan	All	15 Years and older ¬† (Child, Adult, Older Adult)	Phase 4	19	Other|Industry	Interventional	Allocation: Randomized|Intervention Model: Parallel Assignment|Masking: Quadruple (Participant, Care Provider, Investigator, Outcomes Assessor)|Primary Purpose: Treatment	2691	2006-04-01	2008-08-01	2008-08-01	2006-05-03	2013-07-29	2020-10-14	Craig Hospital, Englewood, Colorado, United States		https://ClinicalTrials.gov/show/NCT00320281
NCT00345397	A Colonic Tube to Improve Bowel Function in Spinal Cord Injury		Completed	Has Results	Constipation|Fecal Incontinence|Spinal Cord Injury	Device: Percutaneous endoscopic colostomy (PEC) tube	Change in Bowel QoL	VA Office of Research and Development	All	18 Years and older ¬† (Adult, Older Adult)	Not Applicable	7	U.S. Fed	Interventional	Allocation: N/A|Intervention Model: Single Group Assignment|Masking: None (Open Label)|Primary Purpose: Treatment	B4203-R	2006-05-01	2014-03-31	2018-12-31	2006-06-28	2015-05-22	2019-02-01	Clement J. Zablocki VA Medical Center, Milwaukee, WI, Milwaukee, Wisconsin, United States		https://ClinicalTrials.gov/show/NCT00345397
NCT02042872	Zoledronic Acid Administration in Acute Spinal Cord Injury		Completed	Has Results	Disuse Osteoporosis	Drug: Zoledronic acid	Bone Mineral Density (BMD) at the Distal Femur and Proximal Tibia at Baseline and Month 12.|Bone Mineral Density (BMD) at the Total Hip at Baseline and Month 12	James J. Peters Veterans Affairs Medical Center|Kessler Institute for Rehabilitation	All	18 Years to 49 Years ¬† (Adult)	Phase 4	21	U.S. Fed|Industry	Interventional	Allocation: Non-Randomized|Intervention Model: Parallel Assignment|Masking: None (Open Label)|Primary Purpose: Treatment	5481-03-0013|R-454-03	2006-05-01	2012-07-01	2012-07-01	2014-01-23	2014-07-28	2018-03-14	Kessler Institute for Rehabilitation, West Orange, New Jersey, United States		https://ClinicalTrials.gov/show/NCT02042872
NCT00333762	Use of "Smart Wheelchairs" to Provide Independent Mobility to Visual and Mobility Impairments		Completed	Has Results	Blindness|Spinal Cord Injury	Device: Smart Power Assistance Module (SPAM)|Device: Smart Wheelchair Component System (SWCS)	Time to Complete Trial Wheelchair Course	VA Office of Research and Development	All	18 Years and older ¬† (Adult, Older Adult)	Not Applicable	4	U.S. Fed	Interventional	Allocation: N/A|Intervention Model: Single Group Assignment|Masking: None (Open Label)|Primary Purpose: Prevention	B4065-X	2006-06-01	2008-05-01	2008-05-01	2006-06-06	2015-12-03	2015-12-03	Atlanta VA Medical and Rehab Center, Decatur, Decatur, Georgia, United States|VA Pittsburgh Healthcare System University Drive Division, Pittsburgh, PA, Pittsburgh, Pennsylvania, United States		https://ClinicalTrials.gov/show/NCT00333762
NCT00371631	Colonizing Neurogenic Bladders With Benign Flora		Completed	Has Results	Spinal Cord Injury|Urinary Tract Infection	Biological: Insertion of urinary catheters coated with E. coli 83972	Bladder Colonization|The Rate of Symptomatic UTI While Colonized	US Department of Veterans Affairs|VA Office of Research and Development	All	Child, Adult, Older Adult	Phase 1	13	U.S. Fed	Interventional	Allocation: Non-Randomized|Intervention Model: Single Group Assignment|Masking: None (Open Label)|Primary Purpose: Prevention	B4444-P	2006-10-01	2008-02-01	2008-04-01	2006-09-04	2014-11-24	2014-11-24	Michael E DeBakey VA Medical Center, Houston, Texas, United States		https://ClinicalTrials.gov/show/NCT00371631
NCT00385918	Robotically Assisted Treadmill Training in Spinal Cord Injury (SCI)		Completed	Has Results	Paraplegia|Quadriplegia|Spinal Cord Injury|Tetraplegia	Device: Lokomat Training|Other: Home stretching then Lokomat training	Cardiovascular Fitness as Determined by Lokomat Peak VO2 Assessments|Cardiovascular Fitness as Determined by Arm Cycle Ergometry VO2 Peak Assessments.|Body Mass|Percent Body Fat|Lean Muscle Mass|Bone Mineral Content|Six Minute Walk|10-meter Walk|Step Activity Monitor	US Department of Veterans Affairs|University of Maryland|Kernan Orthopaedics and Rehabilitation Hospital|VA Office of Research and Development	All	18 Years to 80 Years ¬† (Adult, Older Adult)	Not Applicable	18	U.S. Fed|Other	Interventional	Allocation: Randomized|Intervention Model: Parallel Assignment|Masking: None (Open Label)|Primary Purpose: Treatment	B4027|B40271|HP-00042597	2006-10-01	2011-06-01	2011-06-01	2006-10-11	2014-05-14	2014-05-14	VA Maryland Health Care System, Baltimore, Baltimore, Maryland, United States|University of Maryland Rehabilitation and Orthopaedic Institute, Baltimore, Maryland, United States		https://ClinicalTrials.gov/show/NCT00385918
NCT00387673	Effect of Prolonged Electrical Stimulation on Neural Plasticity in Spinal Cord Injury		Completed	Has Results	Spinal Cord Injury	Behavioral: Somatosensory Stimulation and Massed Practice Training	Conduct pre-and Post-training Assessments of Behavioral Outcomes Using Wolf Motor Function Test and Jebsen Taylor Hand Function Test to Measure Upper Extremity Function, Hand-held Dynamometry to Measure Pinch Grip Strength, and Semmes-Weinstein Monofilam	VA Office of Research and Development	All	18 Years to 60 Years ¬† (Adult)	Not Applicable	11	U.S. Fed	Interventional	Allocation: Randomized|Intervention Model: Parallel Assignment|Masking: Single (Participant)|Primary Purpose: Treatment	B4439-R	2006-10-01	2009-10-01	2011-06-01	2006-10-13	2017-06-16	2017-06-16	VA Medical Center, Miami, Miami, Florida, United States		https://ClinicalTrials.gov/show/NCT00387673
NCT00753948	Exhaled Levels of Nitric Oxide		Completed	Has Results	Tetraplegia|Asthma	Drug: N-Nitro L-arginine-methylester (L-NAME)	Exhaled Levels of Nitric Oxide|Specific Airway Conductance (sGaw) as Measured by Plethysmography	VA Office of Research and Development	All	18 Years to 65 Years ¬† (Adult, Older Adult)	Phase 2|Phase 3	23	U.S. Fed	Interventional	Allocation: Non-Randomized|Intervention Model: Parallel Assignment|Masking: None (Open Label)|Primary Purpose: Other	B4335-V	2006-12-01	2010-08-01	2010-08-01	2008-09-17	2014-07-04	2020-02-28	VA Medical Center, Bronx, Bronx, New York, United States		https://ClinicalTrials.gov/show/NCT00753948
NCT00407745	A 17-Week Trial To Assess Pregabalin For The Treatment Of Nerve Pain Due To Spinal Cord Injury		Completed	Has Results	Neuralgia|Spinal Cord Injuries	Drug: placebo|Drug: pregabalin	Duration Adjusted Average Change (DAAC) of Mean Pain Score|Change From Baseline in Weekly Mean Pain Score|Number of Participants With >=30% Reduction in Weekly Mean Pain Score From Baseline|Number of Participants With Categorical Scores on the Patient Global Impression of Change (PGIC) (Full Scale)|Change From Baseline in Weekly Mean Sleep Interference Score|Change From Baseline in Weekly Mean Pa…	Pfizer's Upjohn has merged with Mylan to form Viatris Inc.|Pfizer	All	18 Years and older ¬† (Adult, Older Adult)	Phase 3	220	Industry	Interventional	Allocation: Randomized|Intervention Model: Parallel Assignment|Masking: Double (Participant, Investigator)|Primary Purpose: Treatment	A0081107	2007-01-01	2011-02-01	2011-02-01	2006-12-05	2011-12-08	2021-01-25	Pfizer Investigational Site, Phoenix, Arizona, United States|Pfizer Investigational Site, Phoenix, Arizona, United States|Pfizer Investigational Site, Phoenix, Arizona, United States|Pfizer Investigational Site, Fresno, California, United States|Pfizer Investigational Site, Napa, California, United States|Pfizer Investigational Site, Northridge, California, United States|Pfizer Investigational Si…		https://ClinicalTrials.gov/show/NCT00407745
NCT00426842	A Dose Response Trial Using 5 and 10 Mg of Midodrine Hydrochloride		Completed	Has Results	Orthostatic Hypotension|Spinal Cord Injury	Drug: Midodrine Hydrochloride	Systolic Blood Pressure	James J. Peters Veterans Affairs Medical Center	All	18 Years to 65 Years ¬† (Adult, Older Adult)	Phase 2	11	U.S. Fed	Interventional	Allocation: N/A|Intervention Model: Single Group Assignment|Masking: None (Open Label)|Primary Purpose: Treatment	00893|VA Project #5481-06-051	2007-01-01	2011-03-01	2011-03-01	2007-01-25	2015-05-12	2016-10-10	VA Medical Center, Bronx, Bronx, New York, United States		https://ClinicalTrials.gov/show/NCT00426842
NCT00755079	Use of an Oral Beta-2 Agonist in Persons With Spinal Cord Injury		Completed	Has Results	Spinal Cord Injury	Drug: extended release beta-2 adrenergic agonist|Drug: placebo	Inspiratory Respiratory Muscle Strength|Expiratory Respiratory Muscle Strength	US Department of Veterans Affairs|VA Office of Research and Development	All	18 Years to 60 Years ¬† (Adult)	Phase 2|Phase 3	40	U.S. Fed	Interventional	Allocation: Randomized|Intervention Model: Parallel Assignment|Masking: Triple (Participant, Care Provider, Investigator)|Primary Purpose: Treatment	B4162-C	2007-04-01	2012-08-01	2014-12-01	2008-09-18	2014-07-16	2015-03-17	VA Medical Center, Bronx, Bronx, New York, United States		https://ClinicalTrials.gov/show/NCT00755079
NCT00507546	Functional Melatonin Replacement for Sleep Disruptions in Individuals With Tetraplegia		Completed	Has Results	Insomnia|Spinal Cord Injury|Tetraplegia|Sleep Disorders	Drug: Ramelteon|Drug: Placebo	Amount of Wakefulness After Sleep Onset (WASO)|Change in Subjective Morning Alertness	US Department of Veterans Affairs|Stanford University|Takeda|VA Office of Research and Development	All	18 Years to 65 Years ¬† (Adult, Older Adult)	Phase 4	12	U.S. Fed|Other|Industry	Interventional	Allocation: Randomized|Intervention Model: Crossover Assignment|Masking: Triple (Participant, Investigator, Outcomes Assessor)|Primary Purpose: Treatment	B6010-R|06-038R	2007-07-01	2010-12-01	2011-07-01	2007-07-26	2014-05-22	2014-05-22	VA Palo Alto Health Care System, Palo Alto, California, United States		https://ClinicalTrials.gov/show/NCT00507546
NCT00592384	Project to Improve Symptoms and Mood in People With Spinal Cord Injury	PRISMS	Completed	Has Results	Major Depressive Disorder|Dysthymia|Spinal Cord Injuries	Drug: venlafaxine XR|Drug: placebo	Hamilton Depression Rating Scale-17|Hamilton Depression Rating Scale-Maier Subscale|Symptom Checklist-20 Depression Subscale|Modified Brief Pain Inventory|Modified Ashworth Spasticity Scale|Structured Clinical Interview for DSM IV Depression Module|SF-12|Side Effects Checklist|Craig Handicap and Reporting Technique|Satisfaction With Life|Sheehan Disability Scale|Clinical Global Impression|Patient…	University of Washington|University of Michigan|Shirley Ryan AbilityLab|University of Alabama at Birmingham|Baylor Health Care System|University of Miami|New York University	All	18 Years to 64 Years ¬† (Adult)	Phase 4	133	Other	Interventional	Allocation: Randomized|Intervention Model: Parallel Assignment|Masking: Quadruple (Participant, Care Provider, Investigator, Outcomes Assessor)|Primary Purpose: Treatment	31665-D|H133A060107;	2007-07-01	2012-09-01	2012-09-01	2008-01-14	2015-01-01	2015-01-01	University of Alabama, Birmingham, Alabama, United States|University of Miami, Miami, Florida, United States|Rehabilitation Institute of Chicago, Chicago, Illinois, United States|University of Michigan, Ann Arbor, Michigan, United States|Baylor Institute for Rehabilitation, Dallas, Texas, United States|University of Washington/Harborview Medical Center, Seattle, Washington, United States		https://ClinicalTrials.gov/show/NCT00592384
NCT00732238	Multifaceted Treatment of Catheter-related Urinary Tract Infection		Completed	Has Results	Spinal Cord Injury|Neurogenic Bladder|Urinary Tract Infection	Other: Shortened course of antibiotic therapy|Other: Standard Therapy	The Primary Efficacy Outcome of the Study is Response to Treatment Which Will be Assessed at the End of Therapy. Successful Response to Treatment is Defined as Resolution of Clinical Manifestations of Infection Plus Lack of Growth of the Original Infect|The Secondary Efficacy Outcome is Recurrence of UTI up to 180 Days After the End of Therapy	US Department of Veterans Affairs|VA Office of Research and Development	All	18 Years and older ¬† (Adult, Older Adult)	Phase 2	61	U.S. Fed	Interventional	Allocation: Randomized|Intervention Model: Parallel Assignment|Masking: None (Open Label)|Primary Purpose: Treatment	B4747-P|H-18309	2007-07-01	2012-12-01	2012-12-01	2008-08-11	2014-11-02	2015-02-16	Michael E. DeBakey VA Medical Center (152), Houston, Texas, United States		https://ClinicalTrials.gov/show/NCT00732238
NCT00624806	Developing a Home Telehealth Program to Manage Pressure Ulcers in SCI/D		Completed	Has Results	Spinal Cord Injury	Behavioral: Daily telephone calls|Behavioral: Weekly telephone calls	Days of Data|Number of Days With Triggers at Certain Timeframe|Percent of Participant Triggering DMP Items	US Department of Veterans Affairs|VA Office of Research and Development	All	Child, Adult, Older Adult	Not Applicable	18	U.S. Fed	Interventional	Allocation: Randomized|Intervention Model: Parallel Assignment|Masking: Single (Investigator)|Primary Purpose: Prevention	RRP 07-292	2008-02-01	2009-11-01	2009-11-01	2008-02-27	2014-12-05	2015-04-28	Edward Hines Jr. VA Hospital, Hines, IL, Hines, Illinois, United States|Louis Stokes VA Medical Center, Cleveland, OH, Cleveland, Ohio, United States		https://ClinicalTrials.gov/show/NCT00624806
NCT01765153	Precision Versus Endurance Training to Improve Walking After Chronic Incomplete SCI		Completed	Has Results	Spinal Cord Injury	Behavioral: Endurance|Behavioral: Precision	Change in Spinal Cord Injury - Functional Ambulation Profile (SCI-FAP) at Completion of Study|Change in Spinal Cord Injury - Functional Ambulation Profile (SCI-FAP) at 2 Months of Training Phase I|Change in Spinal Cord Injury - Functional Ambulation Profile (SCI-FAP) at the End of 2 Months of Rest Period I|Change in Spinal Cord Injury - Functional Ambulation Profile (SCI-FAP) at 2 Months of Train…	University of Alberta|Canadian Institutes of Health Research (CIHR)	All	18 Years to 75 Years ¬† (Adult, Older Adult)	Not Applicable	21	Other	Interventional	Allocation: Randomized|Intervention Model: Crossover Assignment|Masking: Single (Outcomes Assessor)|Primary Purpose: Treatment	Pro00003873	2008-03-01	2012-09-01	2012-09-01	2013-01-10	2017-05-02	2017-05-02	University of Alberta, Edmonton, Alberta, Canada		https://ClinicalTrials.gov/show/NCT01765153
NCT00434018	Enhancing Indoor, Community, and Advanced Wheelchair Skills in Spinal Cord Injury (SCI)		Completed	Has Results	Spinal Cord Injury	Behavioral: Wheelchair Skills Training|Behavioral: Basic Health Education	Wheelchair Skills Test (WST)|Craig Handicap Assessment and Reporting Technique (CHART): Physical Independence Subscale|Craig Handicap Assessment and Reporting Technique (CHART): Mobility Subscale|Craig Handicap Assessment and Reporting Technique (CHART): Occupation Subscale|Craig Handicap Assessment and Reporting Technique (CHART): Social Integration Subscale|Craig Handicap Assessment and Reporti…	US Department of Veterans Affairs|VA Office of Research and Development	All	18 Years to 75 Years ¬† (Adult, Older Adult)	Phase 2|Phase 3	138	U.S. Fed	Interventional	Allocation: Randomized|Intervention Model: Parallel Assignment|Masking: None (Open Label)	IIR 06-274	2008-04-01	2011-09-01	2011-12-01	2007-02-12	2014-10-06	2015-05-12	James A. Haley Veterans' Hospital, Tampa, FL, Tampa, Florida, United States|VA Medical Center, Augusta, Augusta, Georgia, United States|VA Medical Center, Jamaica Plain Campus, Boston, Massachusetts, United States		https://ClinicalTrials.gov/show/NCT00434018
NCT00270855	Exercise to Reduce Obesity in Spinal Cord Injury		Completed	Has Results	Diabetes Mellitus|Obesity|Paraplegia|Quadriplegia|Spinal Cord Injury	Procedure: Arm Crank Ergometry|Procedure: FES Cycle Ergometer	Change in % Body Fat|Change in Fat Mass|Change in Fat-Free Mass|Change in Glucose Effectiveness (Sg)|Change in Insulin Sensitivity (Si)|%Body Fat Between Groups|Fat Mass Between Groups|Fat Free Mass Between Groups|Insulin Sensitivity (Si) Between Groups|Glucose Effectiveness (Sg) Between Groups|Change in Lower Limb Bone Mineral Density|Change in Lower Limb Bone Mineral Content|Change in Triglycer…	VA Office of Research and Development|National Center for Research Resources (NCRR)	All	18 Years to 65 Years ¬† (Adult, Older Adult)	Not Applicable	29	U.S. Fed|NIH	Interventional	Allocation: Randomized|Intervention Model: Parallel Assignment|Masking: None (Open Label)|Primary Purpose: Treatment	B3918-R|UL1RR031990	2008-05-01	2011-06-01	2011-12-01	2005-12-28	2017-11-17	2017-11-17	Hunter Holmes McGuire VA Medical Center, Richmond, Virginia, United States		https://ClinicalTrials.gov/show/NCT00270855
NCT00735670	Treatment of Mild to Moderate Depression Symptoms in Patients With Spinal Cord Injury		Completed	Has Results	Spinal Cord Injury	Drug: Venlafaxine HCl|Other: Placebo	16-Item Quick Inventory of Depressive Symptomatology - Self Report (QIDS-SR16)|Depression Scale of the Patient Health Questionnaire (PHQ-9)	University of Michigan|U.S. Department of Education	All	18 Years and older ¬† (Adult, Older Adult)	Not Applicable	34	Other|U.S. Fed	Interventional	Allocation: Randomized|Intervention Model: Parallel Assignment|Masking: Triple (Participant, Investigator, Outcomes Assessor)|Primary Purpose: Treatment	NDNO60032SS|NIDRRH133N060032	2008-06-01	2012-06-01	2012-08-01	2008-08-15	2016-10-13	2016-10-13	University of Michigan Model SCI Care System, Ann Arbor, Michigan, United States		https://ClinicalTrials.gov/show/NCT00735670
NCT00392860	Development of an Ergonomic Wheelchair Pushrim		Completed	Has Results	Spinal Cord Injury	Device: Natural-Fit|Device: PalmRim|Device: Handrim Control Group	Change in Functional Status Score	VA Pittsburgh Healthcare System|University of Pittsburgh	All	18 Years to 55 Years ¬† (Adult)	Phase 2	4	U.S. Fed|Other	Interventional	Allocation: Randomized|Intervention Model: Parallel Assignment|Masking: Single (Participant)|Primary Purpose: Prevention	02484, 0511136	2008-08-01	2011-03-01	2011-09-01	2006-10-26	2014-02-21	2014-02-21	Human Engineering Research Laboratories, Pittsburgh, Pennsylvania, United States		https://ClinicalTrials.gov/show/NCT00392860
NCT00750061	Efficacy and Safety of Lithium Carbonate in the Treatment of Chronic Spinal Cord Injuries		Completed	Has Results	Spinal Cord Injury	Drug: Lithium Carbonate|Drug: Placebo	Changes of Neurological Scores for Baseline|Changes in Functional Independence Measure (FIM) Motor Subscale and Visual Analog Scale (VAS) for Pain	China Spinal Cord Injury Network|China Rehabilitation Research Center|Buddhist Tzu Chi General Hospital	All	18 Years to 60 Years ¬† (Adult)	Phase 2	40	Other	Interventional	Allocation: Randomized|Intervention Model: Parallel Assignment|Masking: Quadruple (Participant, Care Provider, Investigator, Outcomes Assessor)|Primary Purpose: Treatment	CN102A	2008-08-01	2010-05-01	2010-12-01	2008-09-10	2015-05-04	2015-05-04	China Rehabilitation and Research Center, Beijing, China|Buddhist Tzu Chi General Hospital, Taichung Branch, Taichung, Taiwan		https://ClinicalTrials.gov/show/NCT00750061
NCT00860951	P300 Brain Computer Interface Keyboard to Operate Assistive Technology		Completed	Has Results	Healthy|Amyotrophic Lateral Sclerosis|Neuromuscular Disease|Spinal Cord Injury|Cerebral Palsy	Device: Brain Computer Interface Keyboard	Accuracy of Typing With BCI Keyboard.	University of Michigan|Eunice Kennedy Shriver National Institute of Child Health and Human Development (NICHD)|U.S. Department of Education	All	18 Years and older ¬† (Adult, Older Adult)	Phase 1|Phase 2	29	Other|NIH|U.S. Fed	Interventional	Allocation: N/A|Intervention Model: Single Group Assignment|Masking: None (Open Label)|Primary Purpose: Health Services Research	H0002 - AT P300 Keyboard Study|5R21HD054697|H133G090005	2008-09-01	2012-05-01	2012-05-01	2009-03-13	2015-06-11	2015-07-09	University of Michigan Direct Brain Interface Project, Ann Arbor, Michigan, United States|Wadsworth Center, Albany, New York, United States		https://ClinicalTrials.gov/show/NCT00860951
NCT00662207	Two Devices for Reflex Voiding Following Spinal Cord Injury		Completed	Has Results	Spinal Cord Injury|Urinary Incontinence	Device: Vibrator|Procedure: Anal dilator	Number of Participants With a Change in Bladder Pressure|Number of Participants With a Change in External Urethral Pressure|Number of Participants With a Change in Anal Sphincter Pressure|Number of Participants With a Urethral Sphincter Contractions	US Department of Veterans Affairs|VA Office of Research and Development	Male	18 Years to 70 Years ¬† (Adult, Older Adult)	Phase 1	3	U.S. Fed	Interventional	Allocation: N/A|Intervention Model: Single Group Assignment|Masking: None (Open Label)|Primary Purpose: Basic Science	B6176-R	2008-10-01	2009-10-01	2009-10-01	2008-04-21	2014-11-05	2014-11-05	Edward Hines, Jr. VA Hospital, Hines, Illinois, United States		https://ClinicalTrials.gov/show/NCT00662207
NCT00763282	Self-Management to Prevent Ulcers in Veterans With SCI (Spinal Cord Injury)		Completed	Has Results	Pressure Ulcers|Spinal Cord Injuries	Behavioral: Self Management (SM)|Behavioral: Motivational Interviewing (MI)|Behavioral: Education (ED)	Percent of Possible Self-Reported Skin Care Behaviors|Skin Behavior Change|Any Skin Worsening|Skin Status|Mean Number of Skin-related Admissions	US Department of Veterans Affairs|VA Office of Research and Development	All	18 Years and older ¬† (Adult, Older Adult)	Not Applicable	144	U.S. Fed	Interventional	Allocation: Randomized|Intervention Model: Parallel Assignment|Masking: Single (Investigator)|Primary Purpose: Prevention	IIR 06-203	2008-11-01	2011-06-01	2011-12-01	2008-09-30	2015-01-08	2015-04-27	VA Long Beach Healthcare System, Long Beach, CA, Long Beach, California, United States|Charlie Norwood VA Medical Center, Augusta, GA, Augusta, Georgia, United States|Edward Hines Jr. VA Hospital, Hines, IL, Hines, Illinois, United States|Michael E. DeBakey VA Medical Center, Houston, TX, Houston, Texas, United States|Clement J. Zablocki VA Medical Center, Milwaukee, WI, Milwaukee, Wisconsin, Uni…		https://ClinicalTrials.gov/show/NCT00763282
NCT00833105	Rehabilitation of the Upper Extremity With Enhanced Proprioceptive Feedback Following Incomplete Spinal Cord Injury		Completed	Has Results	Spinal Cord Injury|Tetraplegia|Paresis|Plegia	Device: AMES treatment	Grasp Release Test|ASIA Motor Key Muscles|ASIA (ISNCSCI) Sensory/Key Sensory Points/ Light-Touch|ASIA (ISNCSCI) Sensory/Key Sensory Points/Pin-Prick|Van Lieshout Hand Function Test for Tetraplegia- Short Version|Modified Ashworth Scale|Capabilities of Upper Extremity Instrument|Strength Test - Thumb/Finger Extension|Strength Test - Thumb/Fingers Flexion|Strength Test - Wrist Extension|Strength Te…	Oregon Health and Science University|Shepherd Center, Atlanta GA	All	18 Years to 65 Years ¬† (Adult, Older Adult)	Not Applicable	13	Other	Interventional	Allocation: N/A|Intervention Model: Single Group Assignment|Masking: None (Open Label)|Primary Purpose: Treatment	4649	2009-01-01	2011-11-01	2012-01-01	2009-01-30	2019-04-08	2019-05-01	Shepherd Center, Atlanta, Georgia, United States|Oregon Health and Science University, Portland, Oregon, United States		https://ClinicalTrials.gov/show/NCT00833105
NCT00745095	Efficacy and Safety of Standard Oral Colonoscopic Preparations With or Without Neostigmine Compared to Pulse-Irrigation Colonic Lavage		Completed	Has Results	Spinal Cord Injury	Drug: Neostigmine	Quality of Bowel Preparation|Polyp Detection	US Department of Veterans Affairs|VA Office of Research and Development	All	18 Years and older ¬† (Adult, Older Adult)	Phase 4	360	U.S. Fed	Interventional	Allocation: Randomized|Intervention Model: Factorial Assignment|Masking: Single (Outcomes Assessor)|Primary Purpose: Diagnostic	A6428-R|KOR-09-10	2009-03-01	2013-03-01	2013-05-01	2008-09-03	2014-06-30	2014-07-16	VA Medical Center, Bronx, Bronx, New York, United States		https://ClinicalTrials.gov/show/NCT00745095
NCT00826228	Effect of Parathyroid Hormone (PTH) and Weight-Bearing on Bone in Spinal Cord Injury (SCI)		Completed	Has Results	Osteoporosis|Bone Loss|Spinal Cord Injury	Drug: teriparatide|Other: weight-bearing	BMD at Left Total Hip|P1NP	Thomas J. Schnitzer|Eli Lilly and Company|Shirley Ryan AbilityLab|Northwestern University	All	18 Years to 75 Years ¬† (Adult, Older Adult)	Phase 4	12	Other|Industry	Interventional	Allocation: N/A|Intervention Model: Single Group Assignment|Masking: None (Open Label)|Primary Purpose: Treatment	STU00003009	2009-06-01	2012-03-01	2012-12-01	2009-01-22	2013-07-11	2013-07-11	Rehabilitation Institute of Chicago, Chicago, Illinois, United States		https://ClinicalTrials.gov/show/NCT00826228
NCT00886145	Effect of Vibration Therapy on Bone in Persons With Sub-acute Spinal Cord Injury		Completed	Has Results	Spinal Cord Injuries	Device: Vibration: Right Leg and No Vibration: Left Leg.	Percent Change From Baseline in Volumetric Bone Mineral Density (vBMD) at 6-Months	William A. Bauman, M.D.|Kessler Foundation|James J. Peters Veterans Affairs Medical Center	Male	18 Years to 65 Years ¬† (Adult, Older Adult)	Not Applicable	1	U.S. Fed|Other	Interventional	Allocation: N/A|Intervention Model: Single Group Assignment|Masking: None (Open Label)|Primary Purpose: Prevention	B4162C-10	2009-06-01	2012-05-01	2012-12-01	2009-04-22	2016-04-28	2016-04-28	VA Medical Center, Bronx, Bronx, New York, United States		https://ClinicalTrials.gov/show/NCT00886145
NCT01087918	Lokomat Versus Strength Training in Chronic Incomplete Spinal Cord Injury		Completed	Has Results	Spinal Cord Injury	Device: RAGT|Other: Strength Training	10 Meter Walking at Preferred Speed|10 Meter Walking at Maximal Speed|Walking Index for Spinal Cord Injury II|Berg Balance Scale|Spinal Cord Independence Measure III|Mean Latency of the Averaged Motor Evoked Potentials of the Right and the Left M. Tibialis|Manual Muscle Test of the Lower Extremity|Pain on a Visual Analogue Scale|Response Time of the Lower Extremities|Falls Efficacy Scale|Figure o…	University of Zurich	All	16 Years to 70 Years ¬† (Child, Adult, Older Adult)	Phase 1|Phase 2	9	Other	Interventional	Allocation: Randomized|Intervention Model: Crossover Assignment|Masking: None (Open Label)|Primary Purpose: Basic Science	EK-21/2008|CLI006/2 extension	2009-07-01	2011-09-01	2011-09-01	2010-03-16	2012-10-19	2012-10-29	Balgrist University Hospital, Zurich, Switzerland		https://ClinicalTrials.gov/show/NCT01087918
NCT01201759	Effects of Salsalate on Prandial-Induced Vascular Inflammation After Spinal Cord Injury (SCI)		Completed	Has Results	Spinal Cord Injury	Drug: Salsalate 2grams twice a day for 30 days. Then Placebo for 30 days|Drug: Placebo twice a day for 30 days. Then Salsalate 2gr BID for 30 days.	Change in Area Under the Curve (AUC) for Lipemia (Triglycerides) at Visits 2-3 or 4-5 Depending on Order of Treatment Assignment.|Change in Area Under the Curve (AUC) for Glycemia (Glucose) at Visits 2-3 or 4-5 Depending on Order of Treatment Assignment.|Change in Area Under the Curve (AUC) for Lipemia (Free Fatty Acids ) at Visits 2-3 or 4-5 Depending on Order of Treatment Assignment.|Change in …	University of Miami	All	18 Years and older ¬† (Adult, Older Adult)	Not Applicable	18	Other	Interventional	Allocation: Randomized|Intervention Model: Crossover Assignment|Masking: Double (Participant, Investigator)|Primary Purpose: Prevention	20090361|TMP-MN-004	2009-07-01	2012-05-01	2012-05-01	2010-09-15	2015-06-10	2015-06-10	The Miami Project to Cure Paralysis, Miami, Florida, United States		https://ClinicalTrials.gov/show/NCT01201759
NCT00995215	Sub-study to Spinal Cord Stimulation to Restore Cough		Completed	Has Results	Spinal Cord Injuries|Spinal Cord Diseases|Paralysis|Central Nervous System Diseases|Cough	Procedure: Spinal Cord Stimulation|Device: Expiratory Muscle Stimulator	The Effects of Electrical Spinal Cord Stimulation (SCS) on Airway Pressure Generation While Using Temporarily Placed Parallel Wire Leads and Implanted Disc Electrodes	MetroHealth Medical Center|National Institute of Neurological Disorders and Stroke (NINDS)	All	18 Years to 70 Years ¬† (Adult, Older Adult)	Not Applicable	6	Other|NIH	Interventional	Allocation: N/A|Intervention Model: Single Group Assignment|Masking: None (Open Label)|Primary Purpose: Treatment	IRB08-00269/IRB98-00091|IRB08-00269|IRB98-00091	2009-10-01	2017-10-15	2017-10-31	2009-10-15	2020-04-14	2020-04-14	MetroHealth Medical Center, Cleveland, Ohio, United States	Statistical Analysis Plan, https://ClinicalTrials.gov/ProvidedDocs/15/NCT00995215/SAP_000.pdf|"Informed Consent Form", https://ClinicalTrials.gov/ProvidedDocs/15/NCT00995215/ICF_001.pdf|"Study Protocol", https://ClinicalTrials.gov/ProvidedDocs/15/NCT00995215/Prot_002.pdf	https://ClinicalTrials.gov/show/NCT00995215
NCT00990093	A Randomised, Cross-over, Open-labelled Test Catheter Acceptance Study		Completed	Has Results	Spinal Cord Injuries	Device: test intermittent catheter|Device: Intermittent catheterization	Discomfort Measured on a VAS Scale 0 Being no Discomfort, 10 Being Worst Imaginable Discomfort.	Coloplast A/S	Male	18 Years and older ¬† (Adult, Older Adult)	Not Applicable	36	Industry	Interventional	Allocation: Randomized|Intervention Model: Crossover Assignment|Masking: None (Open Label)|Primary Purpose: Treatment	CP062CC	2009-11-01	2010-03-01	2010-03-01	2009-10-06	2012-09-05	2012-09-05	Klinik for Rygmarvsskader, Hornb√¶k, Denmark		https://ClinicalTrials.gov/show/NCT00990093
NCT01037088	Effects of Vaporized Marijuana on Neuropathic Pain		Completed	Has Results	Neuropathic Pain|Reflex Sympathetic Dystrophy|Peripheral Neuropathy|Post-herpetic Neuralgia|Spinal Cord Injury|Multiple Sclerosis	Drug: Mild dose cannabis|Drug: Low dose cannabis|Drug: Cannabis	Participants With 30% or Greater Reduction in Pain Intensity|Visual Analogue Scale Pain Intensity Scores for Baseline and up to 5 Hours Following Administration of Vaporized Cannabis	University of California, Davis|Center for Medicinal Cannabis Research|VA Northern California Health Care System	All	18 Years to 70 Years ¬† (Adult, Older Adult)	Phase 1|Phase 2	44	Other|U.S. Fed	Interventional	Allocation: Randomized|Intervention Model: Crossover Assignment|Masking: Triple (Participant, Investigator, Outcomes Assessor)|Primary Purpose: Treatment	200614658|C06-DA-119	2009-12-01	2012-11-01	2012-11-01	2009-12-21	2013-04-09	2018-01-31	CTSC Clinical Research Center, Sacramento VA Medical Center, Sacramento, California, United States		https://ClinicalTrials.gov/show/NCT01037088
NCT00645567	Biomechanics of Wheelchair Transfers		Completed	Has Results	Spinal Cord Injury	Device: Unassisted Manual Transfer|Device: Standard Transfer Board|Device: Glide n' Go|Device: Easy Reach lift|Device: Ryno lift	Shoulder Force	VA Office of Research and Development	All	18 Years to 65 Years ¬† (Adult, Older Adult)		10	U.S. Fed	Observational	Observational Model: Case-Crossover|Time Perspective: Cross-Sectional	B6103-R	2010-01-01	2011-03-01	2012-12-01	2008-03-27	2017-04-07	2017-04-07	James A. Haley Veterans' Hospital, Tampa, Florida, United States		https://ClinicalTrials.gov/show/NCT00645567
NCT01142115	Test of Discomfort and Malaise of Two Different Urine Catheters in Healthy Volunteers		Completed	Has Results	Spinal Cord Injury	Device: Intermittent catheter CP063CC|Device: SpeediCath	Discomfort Measured on the Visual Analog Scale (VAS)|Irritation During Voiding After Catheterization|Ease of Use Measured on a 5 Point Scale: Insertion Effort|Ease of Use Measured on a 5 Point Scale: Withdrawal Effort|Visible Blood|Haematuria	Coloplast A/S	Male	18 Years and older ¬† (Adult, Older Adult)	Not Applicable	41	Industry	Interventional	Allocation: Randomized|Intervention Model: Crossover Assignment|Masking: Single (Participant)|Primary Purpose: Treatment	CP063CC	2010-01-01	2010-05-01	2010-05-01	2010-06-11	2011-08-09	2011-10-07	Rigshospitalet, dep. 2112, Copenhagen, Denmark		https://ClinicalTrials.gov/show/NCT01142115
NCT00835224	Safety and Efficacy of L-NAME and Midodrine to Increase MAP		Completed	Has Results	Orthostatic Hypotension|Spinal Cord Injury	Drug: L-NAME|Drug: Midodrine|Drug: Placebo	Blood Pressure	US Department of Veterans Affairs|VA Office of Research and Development	All	18 Years to 65 Years ¬† (Adult, Older Adult)	Phase 2	34	U.S. Fed	Interventional	Allocation: Randomized|Intervention Model: Parallel Assignment|Masking: None (Open Label)|Primary Purpose: Treatment	A6161-W|VA Project #5481-08-017	2010-05-01	2013-06-01	2013-08-01	2009-02-03	2014-04-23	2014-04-23	VA Medical Center, Bronx, Bronx, New York, United States		https://ClinicalTrials.gov/show/NCT00835224
NCT01124292	Evaluation of a Tongue Operated Assistive Technology for Individuals With Severe Paralysis	TDS-1	Completed	Has Results	Quadriplegia|Spinal Cord Injury|ALS	Procedure: Tongue Piercing|Device: Usability assessment	Fitts' Law: Horizontal Tapping Using TDS, Keypad, and Mouse (Throughput)|Fitts' Law: Horizontal Tapping Using TDS, Keypad, and Mouse (Error Rate)|Fitts' Law: Vertical Tapping Using TDS, Keypad, and Mouse (Throughput)|Fitts' Law: Vertical Tapping Using TDS, Keypad, and Mouse (Error Rate)|Fitts' Law: Center-Out Tapping Using TDS, Keypad, Mouse, and SnP (Throughput)|Fitts' Law: Center-Out Tapping Us…	Georgia Institute of Technology|Shepherd Center, Atlanta GA|Northwestern University|Shirley Ryan AbilityLab|University of Arizona	All	18 Years to 65 Years ¬† (Adult, Older Adult)	Phase 1	61	Other	Interventional	Allocation: Non-Randomized|Intervention Model: Parallel Assignment|Masking: None (Open Label)|Primary Purpose: Supportive Care	H09240|1RC1EB010915-01	2010-05-01	2012-03-01	2012-03-01	2010-05-17	2013-09-10	2013-09-18	Georgia Institute of Technology, Atlanta, Georgia, United States|Shepherd Center, Atlanta, Georgia, United States|Northwestern University, Chicago, Illinois, United States|Rehabilitation Institute of Chicago, Chicago, Illinois, United States		https://ClinicalTrials.gov/show/NCT01124292
NCT01272011	Effects of Breathing and Walking Treatments on Recovery Post-Spinal Cord Injury		Completed	Has Results	Spinal Cord Injuries|Brown Sequard|Central Cord Syndrome	Other: Intermittent Hypoxia|Other: Locomotor Training	Minute Ventilation - Phase 2|Ventilatory Loading - Phase 3	VA Office of Research and Development|University of Florida|Wayne State University	All	18 Years and older ¬† (Adult, Older Adult)	Not Applicable	16	U.S. Fed|Other	Interventional	Allocation: Non-Randomized|Intervention Model: Parallel Assignment|Masking: Single (Participant)|Primary Purpose: Treatment	B7182-W	2010-05-01	2014-08-01	2014-08-01	2011-01-07	2016-03-29	2016-03-29	North Florida/South Georgia Veterans Health System, Gainesville, Florida, United States		https://ClinicalTrials.gov/show/NCT01272011
NCT02189473	Radiotherapy of Motor Deficits From Metastatic Epidural Spinal Cord Compression	SCORE-2	Completed	Has Results	Metastatic Epidural Spinal Cord Compression	Radiation: radiotherapy	Number of Participants Showing Improvement or no Further Progression of Motor Deficits at 1 Month Following Radiotherapy|Number of Participants Who Were Able to Walk at 1 Month Following Radiotherapy|Number of Participants Who Were Alive at 6 Months Following Radiotherapy Without Deterioration of Motor Function During (or Directly Following) Radiotherapy and Freedom From In-field Recurrence of Me…	Prof. Dirk Rades, MD|University Hospital Schleswig-Holstein	All	18 Years to 89 Years ¬† (Adult, Older Adult)	Not Applicable	203	Other	Interventional	Allocation: Randomized|Intervention Model: Parallel Assignment|Masking: None (Open Label)|Primary Purpose: Treatment	ARO 200901	2010-07-01	2015-07-01	2015-07-01	2014-07-14	2020-02-17	2020-03-05	Mayo Clinic, Scottsdale, Arizona, United States|Oberschwabenklinik Ravensburg, Ravensburg, Baden-Wutemberg, Germany|Klinikum Bayreuth, Bayreuth, Bavaria, Germany|University of Regensburg, Regensburg, Bavaria, Germany|University of W√ºrzburg, W√ºrzburg, Bavaria, Germany|Ruhr University, Bochum, North Rhine Westphalia, Germany|Radiotherapy Practice Dresden-Friedrichstadt, Dresden, Saxonia, Germany|…		https://ClinicalTrials.gov/show/NCT02189473
NCT01202227	An Open-Label Long-Term Study Of Pregabalin For The Treatment Of Central Neuropathic Pain		Completed	Has Results	Spinal Cord Diseases|Spinal Cord Injuries|Neuralgia|Pain	Drug: pregabalin	Number of Participants With Peripheral Edema|Number of Participants With Facial/Periorbital Edema|Number of Participants With Generalized or Abdominal Edema|Number of Participants With Localized Pain Related to Deep Vein Thrombosis (DVT)|Number of Participants With Localized Tenderness Related to Deep Vein Thrombosis (DVT)|Number of Participants With Swelling Related to Deep Vein Thrombosis (DVT)…	Pfizer's Upjohn has merged with Mylan to form Viatris Inc.|Pfizer	All	18 Years and older ¬† (Adult, Older Adult)	Phase 3	104	Industry	Interventional	Allocation: Non-Randomized|Intervention Model: Single Group Assignment|Masking: None (Open Label)|Primary Purpose: Treatment	A0081252	2010-09-01	2012-03-01	2012-03-01	2010-09-15	2013-05-17	2021-01-28	Chubu Rosai Hospital, Nagoya, Aichi, Japan|Kimura Clinic, Nagoya, Aichi, Japan|Nagoya Kyoritsu Clinic, Nagoya, Aichi, Japan|Senboku Kumiai General Hospital, Daisen, Akita, Japan|Go neurosurgical clinic, Chikushi-gun, Fukuoka, Japan|Spinal Injuries Center, Iizuka, Fukuoka, Japan|Brain Attack Center Ota Memorial Hospital, Fukuyama, Hiroshima, Japan|Hokkaido Chuo Rosai Hospital Sekison Center, Bibai…		https://ClinicalTrials.gov/show/NCT01202227
NCT01225055	Effect of Teriparatide, Vibration and the Combination on Bone Mass and Bone Architecture in Chronic Spinal Cord Injury		Completed	Has Results	Spinal Cord Injury|Bone Loss|Osteoporosis	Drug: Teriparatide|Device: vibration	Bone Mineral Density BMD of the Total Hip as Assessed by DXA.|Bone Mineral Density (BMD) by DXA at the Lumbar Spine.|Bone Mineral Density (BMD) by DXA at Femoral Neck|C-terminal Telopeptide|Bone-specific Alkaline Phosphatase|Amino-terminal Propeptide of Type 1 Collagen	Thomas J. Schnitzer|Edward Hines Jr. VA Hospital|University of Illinois at Chicago|Northwestern University	All	21 Years and older ¬† (Adult, Older Adult)	Phase 2	60	Other|U.S. Fed	Interventional	Allocation: Randomized|Intervention Model: Parallel Assignment|Masking: Triple (Participant, Care Provider, Investigator)|Primary Purpose: Treatment	STU00033380	2010-10-01	2015-08-01	2016-08-01	2010-10-20	2017-06-22	2018-06-29	Northwestern University Feinberg School of Medicine, Chicago, Illinois, United States|Edward Hines, Jr, VA Hospital, Maywood, Illinois, United States		https://ClinicalTrials.gov/show/NCT01225055
NCT01188447	Evaluation of the Safety of C-Spine Clearance by Paramedics		Completed	Has Results	Fracture of Cervical Spine	Procedure: Canadian C-Spine Rule	Adverse Events|Clearance Rate|Performance of the Canadian C-Spine Rule|Scene Time|Average Contact Time	Ottawa Hospital Research Institute|Canadian Institutes of Health Research (CIHR)	All	16 Years and older ¬† (Child, Adult, Older Adult)	Not Applicable	4034	Other	Interventional	Allocation: N/A|Intervention Model: Single Group Assignment|Masking: None (Open Label)|Primary Purpose: Diagnostic	2009142-01H	2011-01-01	2015-08-01	2015-09-01	2010-08-25	2017-08-04	2017-08-04	Ottawa Paramedic Service, Ottawa, Ontario, Canada		https://ClinicalTrials.gov/show/NCT01188447
NCT02307526	Acetylcholinesterase Inhibition and Orthostatic Hypotension in SCI		Completed	Has Results	Hypotension, Postural	Drug: Pyridostigmine Bromide|Device: Tilt table test	Systolic Blood Pressure|Diastolic Blood Pressure|Heart Rate	James J. Peters Veterans Affairs Medical Center	All	18 Years to 65 Years ¬† (Adult, Older Adult)	Phase 2	10	U.S. Fed	Interventional	Allocation: N/A|Intervention Model: Single Group Assignment|Masking: None (Open Label)|Primary Purpose: Treatment	WEC-11-04	2011-01-01	2015-03-01	2015-03-01	2014-12-04	2017-07-21	2017-07-21	Kessler Institute for Rehabilitation, West Orange, New Jersey, United States		https://ClinicalTrials.gov/show/NCT02307526
NCT01093014	Novel Intervention to Influence Muscle Plasticity in Veterans		Completed	Has Results	Spinal Cord Injuries	Behavioral: Low-force muscle stimulation|Behavioral: High-force muscle stimulation|Behavioral: Sequential low-force and high-force muscle stimulation	HF Muscle Force|LF Muscle Force|Skeletal Muscle Gene Regulation: MSTN|Skeletal Muscle Gene Expression: PPARGC1A	VA Office of Research and Development|University of Iowa	All	18 Years to 75 Years ¬† (Adult, Older Adult)	Not Applicable	33	U.S. Fed|Other	Interventional	Allocation: Non-Randomized|Intervention Model: Single Group Assignment|Masking: None (Open Label)|Primary Purpose: Treatment	B7097-R	2011-04-01	2014-12-01	2014-12-01	2010-03-25	2016-02-05	2016-03-10	Iowa City VA Health Care System, Iowa City, IA, Iowa City, Iowa, United States		https://ClinicalTrials.gov/show/NCT01093014
NCT01407354	Comparison of Lokomat and Aquatic Exercise for Individuals With Chronic Incomplete Spinal Cord Injury		Completed	Has Results	Spinal Cord Injury	Device: Lokomat treadmill training|Other: Aquatic exercise therapy	Number of Participants Demonstrating 10% Change: Arm Ergometer and Lokomat Metabolic Cart VO2 Peak|Number of Movement Recorded by Activity Monitor (SAM)	University of Maryland, Baltimore|Shepherd Center, Atlanta GA	All	18 Years to 65 Years ¬† (Adult, Older Adult)	Not Applicable	37	Other	Interventional	Allocation: Randomized|Intervention Model: Crossover Assignment|Masking: Single (Outcomes Assessor)|Primary Purpose: Treatment	HP-00047439|SC090147	2011-04-01	2014-04-01	2014-07-01	2011-08-02	2016-04-08	2021-05-26	Shepherd Center, Virginia C. Crawford Research Institute, Atlanta, Georgia, United States|University of Maryland Rehabilitation & Orthopaedic Institute (formerly known as Kernan Hospital), Baltimore, Maryland, United States		https://ClinicalTrials.gov/show/NCT01407354
NCT01479777	Functional Electrical Stimulation (FES) Driven Stepping in Individuals With Spinal Cord Injury		Completed	Has Results	Spinal Cord Injury	Device: FES Stepping (RT600 from Restorative Therapies, INC.)	Change in Motor and Sensory Scores of the ASIA Impairment Scale (AIS)|Change in Heart Rate|Change in Systolic Blood Pressure|Change in Diastolic Plood Pressure|Change in Rate of Perceived Exertion|Change in Vital Capacity|Change in Peak Cough Flow	Hugo W. Moser Research Institute at Kennedy Krieger, Inc.	All	18 Years to 65 Years ¬† (Adult, Older Adult)	Phase 1|Phase 2	12	Other	Interventional	Allocation: N/A|Intervention Model: Single Group Assignment|Masking: None (Open Label)|Primary Purpose: Treatment	NA_00016421	2011-04-01	2012-04-01	2012-04-01	2011-11-24	2014-09-15	2014-09-15	Kennedy Krieger Institute, Baltimore, Maryland, United States		https://ClinicalTrials.gov/show/NCT01479777
NCT01357980	Neurogenic Detrusor Overactivity Following Spinal Cord Injury or Multiple Sclerosis		Completed	Has Results	Detrusor Muscle Hyperactivity	Biological: Botulinum toxin type A|Drug: Placebo	Daily Incontinence Episode Frequency (IEF)|Urodynamics: Maximum Cystometric Capacity|Urodynamics:Maximum Detrusor Pressure|Physician's Global Assessment Score of Treatment Response|Quality of Life (QoL) Total Summary Score|Pain Visual Analogue Scale (VAS) Score: Before Treatment Injection|Pain Visual Analogue Scale (VAS) Score: During Treatment Injection Procedure	Ipsen	All	18 Years to 70 Years ¬† (Adult, Older Adult)	Phase 2	47	Industry	Interventional	Allocation: Randomized|Intervention Model: Parallel Assignment|Masking: Quadruple (Participant, Care Provider, Investigator, Outcomes Assessor)|Primary Purpose: Treatment	Y-52-52120-155|2010-023210-31	2011-05-01	2013-03-01	2013-03-01	2011-05-23	2014-09-01	2020-11-05	Faculty Hospital Motol, Praha, Czechia|THOMAYER Faculty Hospital, Praha, Czechia|Hopital Raymond Poincar√©, Garches, France|Hopital HURIET, Lille, France|H√¥pital Lyon Sud -Hospices Civils de Lyon, Lyon, France|Hopital de la conception, Marseille, France|CHU Hotel Dieu, Nantes, France|Groupe Hospitalier La Piti√© Salpetriere, Paris, France|Hopital Tenon, Paris, France|CMRRF Kerpape, Ploemeur, Fra…		https://ClinicalTrials.gov/show/NCT01357980
NCT01393444	ECoG Direct Brain Interface for Individuals With Upper Limb Paralysis		Completed	Has Results	Tetraplegia|Spinal Cord Injury|Brachial Plexus Injury|Muscular Dystrophy|ALS|Brainstem Stroke	Device: Implantation of ECoG sensors on the brain surface	Number of Participants Able to Successfully Control of a Variety of External Devices Using Neural Data Recorded With ECoG|Number of Participants Able to Achieve Direct Brain Control of Assistive Devices Using an Electrocorticography (ECoG)-Based Brain-computer Interface System	University of Pittsburgh	All	18 Years to 70 Years ¬† (Adult, Older Adult)	Not Applicable	6	Other	Interventional	Allocation: N/A|Intervention Model: Single Group Assignment|Masking: None (Open Label)	PRO10010149	2011-05-01	2015-04-01	2015-04-01	2011-07-13	2016-12-12	2016-12-12	University of Pittsburgh, Pittsburgh, Pennsylvania, United States		https://ClinicalTrials.gov/show/NCT01393444
NCT01822535	Body Temperature in Persons With Tetraplegia When Exposed to Cold		Completed	Has Results	Tetraplegia|Hypothermia|Mild Cognitive Impairment	Drug: Midodrine hydrochloride	Visit 1: Percent Change in Core Body Temperature|Visit 2: Percent Change in Core Body Temperature With Midodrine|Visit 1: Percent Changes in Cognitive Performance - Stroop Interference|Visit 1: Percent Changes in Cognitive Performance - Delayed Recall	James J. Peters Veterans Affairs Medical Center	All	18 Years to 68 Years ¬† (Adult, Older Adult)	Phase 4	30	U.S. Fed	Interventional	Allocation: Non-Randomized|Intervention Model: Factorial Assignment|Masking: None (Open Label)	1374	2011-07-01	2015-10-01	2015-10-01	2013-04-02	2016-03-04	2016-03-04	Center of Excellence for the Medical Consequences of SCI, JJP VAMC, 7A-13, Bronx, New York, United States		https://ClinicalTrials.gov/show/NCT01822535
NCT01141647	SCI-VIP: Predictive Outcome Model Over Time for Employment (PrOMOTE)	PrOMOTE	Completed	Has Results	Spinal Cord Injuries	Behavioral: Vocational Rehabilitation	Identify Factors That Predict Employment After SCI.|Employment Rate|Determine Ongoing Effectiveness of SE Over Time.|Evaluate the Effectiveness of Implementation Strategy and Level of SE Model Implementation Across Sites.|Determine Total Cost Per Patient Over 24 Months|Determine Cost-effectiveness.	VA Office of Research and Development	All	18 Years to 65 Years ¬† (Adult, Older Adult)	Not Applicable	1047	U.S. Fed	Interventional	Allocation: N/A|Intervention Model: Single Group Assignment|Masking: None (Open Label)|Primary Purpose: Treatment	O7814-R	2011-08-01	2015-03-01	2015-03-01	2010-06-10	2017-03-31	2017-05-11	VA Palo Alto Health Care System, Palo Alto, CA, Palo Alto, California, United States|James A. Haley Veterans' Hospital, Tampa, FL, Tampa, Florida, United States|VA Boston Healthcare System Jamaica Plain Campus, Jamaica Plain, MA, Boston, Massachusetts, United States|VA Medical Center, Cleveland, Cleveland, Ohio, United States|VA North Texas Health Care System Dallas VA Medical Center, Dallas, TX,…		https://ClinicalTrials.gov/show/NCT01141647
NCT01204736	Comparing Outcomes of Elbow Extension Tendon Transfers		Completed	Has Results	Cervical Spinal Cord Injury		Elbow Extension Strength	VA Office of Research and Development|Shirley Ryan AbilityLab|Northwestern University|Case Western Reserve University|Loyola University|MetroHealth System - Cleveland, OH	All	18 Years to 60 Years ¬† (Adult)		14	U.S. Fed|Other	Observational	Observational Model: Cohort|Time Perspective: Retrospective	B7515-R	2011-08-01	2014-12-01	2015-12-01	2010-09-17	2016-01-07	2016-03-08	Edward Hines Jr. VA Hospital, Hines, IL, Hines, Illinois, United States		https://ClinicalTrials.gov/show/NCT01204736
NCT01882257	Home-Based Diagnosis and Management of Sleep-Related Breathing Disorders in Spinal Cord Injury		Completed	Has Results	Obstructive Sleep Apnea|Hypercapnia|Spinal Cord Injury	Device: BiPAP|Device: BiPAP/AVAPS (Phillips Respironics)	Prevalence of Sleep-disordered Breathing in Spinal Cord-injured Adults|The Frequency of Technical Errors Related to the Home-based Overnight Testing.	University of Michigan	All	18 Years and older ¬† (Adult, Older Adult)	Not Applicable	93	Other	Interventional	Allocation: Non-Randomized|Intervention Model: Single Group Assignment|Masking: None (Open Label)|Primary Purpose: Diagnostic	HUM00051504|W81XWH-11-1-0826	2011-10-01	2015-12-01	2016-02-01	2013-06-20	2017-01-04	2017-01-11	University of Michigan Health System, Ann Arbor, Michigan, United States		https://ClinicalTrials.gov/show/NCT01882257
NCT00890916	Hand Function for Tetraplegia		Completed	Has Results	Spinal Cord Injury|Tetraplegia	Device: FIRSTHAND System	Grasp Release Test - Test of Functional Ability to Pick up and Move Objects	VA Office of Research and Development	All	18 Years and older ¬† (Adult, Older Adult)	Not Applicable	10	U.S. Fed	Interventional	Allocation: N/A|Intervention Model: Single Group Assignment|Masking: None (Open Label)|Primary Purpose: Treatment	A6027-R	2012-01-01	2015-11-01	2021-05-01	2009-04-30	2017-02-08	2021-06-09	Louis Stokes VA Medical Center, Cleveland, OH, Cleveland, Ohio, United States		https://ClinicalTrials.gov/show/NCT00890916
NCT01555983	Vaporized Cannabis and Spinal Cord Injury Pain		Completed	Has Results	Spinal Cord Injuries|Spinal Cord Diseases	Drug: Vaporization of Cannabis	Number of Participants Achieving a Reduction in Pain Intensity of 30% or More	Barth Wilsey|VA Northern California Health Care System|University of California, San Diego|National Institute on Drug Abuse (NIDA)|University of California, Davis	All	18 Years to 70 Years ¬† (Adult, Older Adult)	Phase 2|Phase 3	42	Other|U.S. Fed|NIH	Interventional	Allocation: Randomized|Intervention Model: Crossover Assignment|Masking: Triple (Participant, Investigator, Outcomes Assessor)|Primary Purpose: Treatment	256412|1R01DA030424-01A1	2012-07-01	2014-08-01	2014-08-01	2012-03-16	2016-01-15	2017-04-18	UC Davis CTSC Clinical Research Center , Sacramento VA Medical Center, Mather, California, United States		https://ClinicalTrials.gov/show/NCT01555983
NCT01652040	Resistance Training and Testosterone After Spinal Cord Injury		Completed	Has Results	Spinal Cord Injury	Device: Resistance Training and Testosterone Patches|Drug: Testosterone Patches	Body Composition|Metabolic Profile	VA Office of Research and Development|Virginia Commonwealth University	Male	18 Years to 50 Years ¬† (Adult)	Phase 2|Phase 3	26	U.S. Fed|Other	Interventional	Allocation: Randomized|Intervention Model: Factorial Assignment|Masking: Single (Investigator)|Primary Purpose: Health Services Research	B7867-W	2012-07-02	2017-12-30	2017-12-30	2012-07-27	2018-05-03	2018-05-03	Hunter Holmes McGuire VA Medical Center, Richmond, VA, Richmond, Virginia, United States	Study Protocol and Statistical Analysis Plan, https://ClinicalTrials.gov/ProvidedDocs/40/NCT01652040/Prot_SAP_000.pdf	https://ClinicalTrials.gov/show/NCT01652040
NCT01502631	Study to Evaluate the Efficacy, Safety, and Pharmacokinetics of SUN13837 Injection in Adult Subjects With Acute Spinal Cord Injury (ASCI)		Completed	Has Results	Acute Spinal Cord Injury	Drug: SUN13837 injection|Drug: Placebo	Total Spinal Cord Independence Measure, Version III (SCIM III) Score Following Treatment With SUN13837 Injection or Placebo in Adult With Acute Spinal Cord Injury|Sensitivity Analyses of Total Spinal Cord Independence Measure, Version III (SCIM III) Score at Week 16 by Treatment Group|Change From Baseline of Total Motor Score (TMS) of International Standards for Neurological Classification of Spi…	Daiichi Sankyo, Inc.	All	16 Years to 80 Years ¬† (Child, Adult, Older Adult)	Phase 2	65	Industry	Interventional	Allocation: Randomized|Intervention Model: Parallel Assignment|Masking: Quadruple (Participant, Care Provider, Investigator, Outcomes Assessor)|Primary Purpose: Treatment	ASBI 603	2012-08-08	2014-09-21	2014-09-21	2012-01-02	2021-01-15	2021-01-15	Tucson, Arizona, United States|Downey, California, United States|Los Angeles, California, United States|Sacramento, California, United States|San Jose, California, United States|Denver, Colorado, United States|Englewood, Colorado, United States|Newark, Delaware, United States|Hollywood, Florida, United States|Atlanta, Georgia, United States|Atlanta, Georgia, United States|Honolulu, Hawaii, United…		https://ClinicalTrials.gov/show/NCT01502631
NCT01682603	Effect of Botulinum Toxin A on Detrusor Overactivity and Renal Function in Chronic Spinal Cord Injured Patients		Completed	Has Results	Spinal Cord Injuries	Drug: Botulinum toxin A	Net Change of the Urinary Distress Inventory (UDI-6)|Net Change of the Incontinence Impact Questionnaire (IIQ-7)|Net Change of the Quality of Life Index (QoL-I)|Net Change of the Cystometric Bladder Capacity (CBC)|Net Change of the Bladder Compliance|Net Change of the Maximum Flow Rate (Qmax)|Net Change of the Void Volume|Net Change of the Detrusor Pressure (Pdet)|Net Change of the Postvoid Resid…	Buddhist Tzu Chi General Hospital	All	19 Years to 65 Years ¬† (Adult, Older Adult)	Phase 2	34	Other	Interventional	Allocation: N/A|Intervention Model: Single Group Assignment|Masking: None (Open Label)|Primary Purpose: Treatment	TCGHUROL005	2012-09-01	2013-12-01	2013-12-01	2012-09-11	2014-07-23	2017-03-20	Buddhist Tzu Chi General Hospital, Hualien, Taiwan		https://ClinicalTrials.gov/show/NCT01682603
NCT01740128	Multimodal Exercises to Improve Leg Function After Spinal Cord Injury		Completed	Has Results	Spinal Cord Injuries|Paraplegia|Paraparesis	Device: Robotic body weight supported treadmill training|Other: Harness-supported multimodal balance training	Change in Motor Evoked Potential (MEP) Amplitude in the Tibialis Anterior Muscle at the End of Training.|Change From Baseline in ISNCSCI Lower Extremity Motor Score.|Change From Baseline in Berg Balance Scale Sitting With Back Unsupported Score.|Change in Leg Spasticity on Modified Ashworth Scale|Change in Gait Speed on 10-meter Walk Test.|Change From Baseline in Walking Index for Spinal Cord Inj…	VA Office of Research and Development	All	21 Years to 65 Years ¬† (Adult, Older Adult)	Not Applicable	21	U.S. Fed	Interventional	Allocation: Randomized|Intervention Model: Crossover Assignment|Masking: Single (Outcomes Assessor)|Primary Purpose: Treatment	B0881-W|5IK2RX000881-03|01407|SPU-11-077	2013-01-01	2016-11-30	2017-10-23	2012-12-04	2018-02-26	2018-02-26	James J. Peters VA Medical Center, Bronx, NY, Bronx, New York, United States		https://ClinicalTrials.gov/show/NCT01740128
NCT02025179	12 Month Extension Study of the Effect of Teriparatide on Bone in People With Chronic Spinal Cord Injury (SCI)		Completed	Has Results	Spinal Cord Injury|Bone Loss|Osteoporosis	Drug: Teriparatide|Device: Vibration	Bone Mineral Density (BMD) of the Total Hip as Assessed by Dual-energy X-ray Absorptiometry (DXA)|C-terminal Telopeptide|Bone Mineral Density (BMD) by DXA at the Lumbar Spine|Bone Mineral Density (BMD) by DXA at Femoral Neck|Amino-terminal Propeptide of Type 1 Collagen|Bone-specific Alkaline Phosphatase	Northwestern University|United States Department of Defense	All	21 Years and older ¬† (Adult, Older Adult)	Phase 2	25	Other|U.S. Fed	Interventional	Allocation: N/A|Intervention Model: Single Group Assignment|Masking: None (Open Label)|Primary Purpose: Treatment	A1195	2013-01-01	2015-08-14	2015-08-14	2013-12-31	2018-09-25	2018-09-25	Northwestern University Feinberg School of Medicine, Chicago, Illinois, United States		https://ClinicalTrials.gov/show/NCT02025179
NCT01849822	Providing Brain Control of Extracorporeal Devices to Patients With Quadriplegia		Completed	Has Results	Tetraplegia	Device: Neural Prosthetic System	Number of Participants With Patient Control Over the End Effector (Virtual or Physical)|Number of Participants With Absence of Infection or Irritation	Richard A. Andersen, PhD|University of Southern California|Rancho Los Amigos National Rehabilitation Center|California Institute of Technology	All	18 Years to 65 Years ¬† (Adult, Older Adult)	Not Applicable	1	Other	Interventional	Allocation: N/A|Intervention Model: Single Group Assignment|Masking: None (Open Label)|Primary Purpose: Basic Science	16384	2013-02-01	2019-01-01	2019-01-01	2013-05-09	2021-04-30	2021-04-30	Rancho Los Amigos National Rehabilitation Center, Downey, California, United States|University of Southern California, Los Angeles, California, United States|California Institute of Technology, Pasadena, California, United States	Study Protocol, https://ClinicalTrials.gov/ProvidedDocs/22/NCT01849822/Prot_000.pdf|"Statistical Analysis Plan", https://ClinicalTrials.gov/ProvidedDocs/22/NCT01849822/SAP_001.pdf	https://ClinicalTrials.gov/show/NCT01849822
NCT01909154	Safety Study of Local Administration of Autologous Bone Marrow Stromal Cells in Chronic Paraplegia	CME-LEM1	Completed	Has Results	Spinal Cord Injury	Biological: Mesenchymal stromal cell therapy	Safety-Number of Adverse Events|Efficacy-Sensitivity Recovery Using ASIA Scale|Efficacy-Changes in the Level of Chronic Pain Based on the IANR-SCIFRS Scale (Pain Section)|Efficacy- Changes in the Neurophysiological Parameters Measured as the Number of Patients With SSEPs (Somatosensory Evoked Potentials)|Efficacy-Urodynamic Studies in Terms of m√°ximum Cystometric Capacity|Efficacy-modification o…	Puerta de Hierro University Hospital	All	18 Years to 60 Years ¬† (Adult)	Phase 1	12	Other	Interventional	Allocation: N/A|Intervention Model: Single Group Assignment|Masking: None (Open Label)|Primary Purpose: Treatment	CME-LEM1|2010-023285-46	2013-03-01	2014-04-01	2015-03-01	2013-07-26	2019-03-29	2019-03-29	Hospital Puerta de Hierro, Majadahonda, Madrid, Spain		https://ClinicalTrials.gov/show/NCT01909154
NCT02001558	Pressure Ulcer Healing With Microcyn		Completed	Has Results	Pressure Ulcer|Spinal Cord Injuries	Drug: Microcyn|Other: Sterile saline	Pressure Ulcer Size (Length x Width x Depth, cm^3) at Baseline|Pressure Ulcer Size (Length x Width x Depth, cm^3) at 4 Weeks After Baseline|Pressure Ulcer Size (Length x Width x Depth, cm^3) at 8 Weeks After Baseline|Pressure Ulcer Size (Length x Width x Depth, cm^3) at 12 Weeks After Baseline|Pressure Ulcer Size (Length x Width x Depth, cm^3) at 16 Weeks After Baseline|Pressure Ulcer Size (Lengt…	University of Alabama at Birmingham|Oculus Innovative Sciences, Inc.	All	18 Years and older ¬† (Adult, Older Adult)	Phase 4	65	Other|Industry	Interventional	Allocation: Randomized|Intervention Model: Parallel Assignment|Masking: None (Open Label)|Primary Purpose: Treatment	MIC-UABWC-001	2013-03-01	2017-08-01	2017-08-01	2013-12-05	2018-11-06	2018-11-06	University of Alabama at Birmingham, Birmingham, Alabama, United States	Study Protocol and Statistical Analysis Plan, https://ClinicalTrials.gov/ProvidedDocs/58/NCT02001558/Prot_SAP_000.pdf	https://ClinicalTrials.gov/show/NCT02001558
NCT04075812	High Definition Neuromuscular Stimulation in Tetraplegia		Completed	Has Results	Spinal Cord Injury at C4-C6 Level	Device: Neuromuscular Stimulator	Change in Voluntary Movement|Change in Functional Movement	Ohio State University	All	21 Years and older ¬† (Adult, Older Adult)	Not Applicable	2	Other	Interventional	Allocation: N/A|Intervention Model: Single Group Assignment|Masking: None (Open Label)|Primary Purpose: Other	2013H0092	2013-04-25	2019-06-21	2019-06-21	2019-09-03	2021-08-09	2021-08-09	The Ohio State University Wexner Medical Center - Center for Neuromodulation, Columbus, Ohio, United States	Study Protocol and Statistical Analysis Plan, https://ClinicalTrials.gov/ProvidedDocs/12/NCT04075812/Prot_SAP_000.pdf	https://ClinicalTrials.gov/show/NCT04075812
NCT01748695	A Safety, Tolerability and Efficacy Study of V158866 in Central Neuropathic Pain Following Spinal Cord Injury		Completed	Has Results	Neuropathic Pain Due to Spinal Cord Injury	Drug: V158866|Drug: Placebo	Mean Pain Intensity (NRS)|Safety and Tolerability of V158866 Compared to Placebo	Brigham and Women's Hospital|Vernalis (R&D) Ltd	All	18 Years to 65 Years ¬† (Adult, Older Adult)	Phase 2	25	Other|Industry	Interventional	Allocation: Randomized|Intervention Model: Crossover Assignment|Masking: Double (Participant, Investigator)|Primary Purpose: Treatment	V158866-2Pa-01	2013-06-01	2015-07-01	2015-07-01	2012-12-12	2017-04-11	2017-04-11	Translational Pain Research, Brigham and Women's Hospital, Boston, Massachusetts, United States		https://ClinicalTrials.gov/show/NCT01748695
NCT02406859	Utility of an Animated Bowel Biofeedback Training Routine to Improve Bowel Function in Individuals With SCI		Completed	Has Results	Spinal Cord Injury|Constipation|Fecal Incontinence|Neurogenic Bowel	Behavioral: Bowel Biofeedback|Behavioral: Anorectal Manometry	Baseline Motility (Anorectal Sensation and Strength) Characteristics|Change in Rectal and Sphincter Pressure Due to Bowel Biofeedback Training in Individuals With Incomplete SCI.|Changes in Recto-anal Inhibitory Reflex (RAIR) Due to Bowel Biofeedback Training in Individuals With Incomplete SCI.|Change in Subjective Bowel Care Due to Guided and Self-Guided Biofeedback Training in Individuals With …	VA Office of Research and Development|James J. Peters Veterans Affairs Medical Center	All	18 Years to 75 Years ¬† (Adult, Older Adult)	Not Applicable	50	U.S. Fed	Interventional	Allocation: Non-Randomized|Intervention Model: Single Group Assignment|Masking: Single (Investigator)|Primary Purpose: Treatment	B1915-P|KOR-13-010	2013-07-01	2017-06-30	2017-12-29	2015-04-02	2021-09-17	2021-09-17	James J. Peters VA Medical Center, Bronx, NY, Bronx, New York, United States	Study Protocol, https://ClinicalTrials.gov/ProvidedDocs/59/NCT02406859/Prot_000.pdf|"Statistical Analysis Plan", https://ClinicalTrials.gov/ProvidedDocs/59/NCT02406859/SAP_001.pdf|"Informed Consent Form", https://ClinicalTrials.gov/ProvidedDocs/59/NCT02406859/ICF_002.pdf	https://ClinicalTrials.gov/show/NCT02406859
NCT01997125	Reanimation in Tetraplegia		Completed	Has Results	Spinal Cord Injury (Quadraplegia)	Device: Neural Bridge System	Number of Participants With Voluntary Movement	Marcia Bockbrader|Ohio State University	All	21 Years to 89 Years ¬† (Adult, Older Adult)	Not Applicable	1	Other	Interventional	Allocation: N/A|Intervention Model: Single Group Assignment|Masking: None (Open Label)|Primary Purpose: Other	2013H0164	2013-11-01	2019-06-13	2019-06-13	2013-11-27	2021-07-09	2021-08-31	The Ohio State University Wexner Medical Center - Center for Neuromodulation, Columbus, Ohio, United States	Study Protocol and Statistical Analysis Plan, https://ClinicalTrials.gov/ProvidedDocs/25/NCT01997125/Prot_SAP_000.pdf	https://ClinicalTrials.gov/show/NCT01997125
NCT03011099	Improving Gait Performance in Individuals With Spinal Cord Injuries: an Intervention Using Robotic Exoskeletons		Completed	Has Results	Spinal Cord Injuries	Device: Robotic exoskeleton training|Other: Conventional physical therapy	Change in Over Ground Gait Speed as Assessed by the 10 Meter Walk Test|Change in Walking Endurance as Assessed by the 6 Minute Walk Test|Change in Dynamic Mobility Assessment as Determined by the Timed Up and Go Test|Change in Muscle Activity as Assessed by Surface Electromyography (EMG)|Change in Energy Expenditure During Walking as Assessed by Oxygen Cost|Change in Gait Characteristics as Asses…	The University of Texas Health Science Center, Houston	All	18 Years and older ¬† (Adult, Older Adult)	Not Applicable	12	Other	Interventional	Allocation: Randomized|Intervention Model: Parallel Assignment|Masking: Single (Outcomes Assessor)|Primary Purpose: Treatment	HSC-MS-13-0536	2014-01-01	2016-03-01	2016-03-01	2017-01-05	2018-04-03	2018-04-03	The University of Texas Health Science Center at Houston, Houston, Texas, United States		https://ClinicalTrials.gov/show/NCT03011099
NCT02195895	Effect of Alendronate on Bone in People With Chronic Spinal Cord Injury (SCI) Previously Treated With Teriparatide		Completed	Has Results	Spinal Cord Injury|Bone Loss|Osteoporosis	Drug: Alendronate|Dietary Supplement: Calcium|Dietary Supplement: Vitamin D	BMD of Total Hip by DXA|C-terminal Telopeptide (CTX)|BMD by DXA at the Lumbar Spine|Amino-terminal Propeptide of Type 1 Collagen (P1NP)|Bone-specific Alkaline Phosphatase (BSAP)	Northwestern University	All	21 Years and older ¬† (Adult, Older Adult)	Phase 2	17	Other	Interventional	Allocation: N/A|Intervention Model: Single Group Assignment|Masking: None (Open Label)|Primary Purpose: Treatment	STU00083759	2014-04-01	2016-08-05	2016-08-05	2014-07-21	2018-09-26	2019-01-08	Northwestern University Feinberg School of Medicine, Chicago, Illinois, United States		https://ClinicalTrials.gov/show/NCT02195895
NCT02274649	Clinical Trial to Evaluate One-to-one Peer Mentoring		Completed	Has Results	Injuries, Spinal Cord	Behavioral: one-to-one peer mentoring|Behavioral: general peer support	Self-efficacy Scale. It Includes an Adapted Self-efficacy Scale From Chronic Disease Literature Focused on Confidence in Managing Self-care Needs Plus Project-specific Items for Assessment of Confidence Regarding Integration Into Community Life.|Rehospitalization - Number of Days|Rehospitalization - Percent of Patients Rehospitalized|Rehospitalization - Number of Days (Cumulative)|Rehospitalizati…	Shepherd Center, Atlanta GA	All	Child, Adult, Older Adult	Not Applicable	194	Other	Interventional	Allocation: Randomized|Intervention Model: Parallel Assignment|Masking: Single (Outcomes Assessor)|Primary Purpose: Supportive Care	581327-1	2014-04-01	2016-04-01	2016-04-01	2014-10-24	2019-02-04	2019-02-04			https://ClinicalTrials.gov/show/NCT02274649
NCT02165904	Subarachnoid Administrations of Adults Autologous Mesenchymal Stromal Cells in SCI		Completed	Has Results	Spinal Cord Injury	Biological: Adult Autologous Mesenchymal Bone Marrow Cell	Efficacy-Sensivity Improvement Using the ASIA Score|Efficacy- Changes in Functional Independence Measure Scale|Efficacy-Change in Barthel Score|Efficacy-IANC-SCIFRS Scale|Efficacy-Changes in PENN Score.|Changes in ASHWORTH Score|Efficacy-Changes in EVA Score|Efficacy- Changes in Geffner Score|Efficacy- Changes in NBD Score|Efficacy-Changes in the Neurophysiological Parameters (SSEPs, Somatosensor…	Puerta de Hierro University Hospital	All	18 Years to 70 Years ¬† (Adult, Older Adult)	Phase 1	10	Other	Interventional	Allocation: N/A|Intervention Model: Single Group Assignment|Masking: None (Open Label)|Primary Purpose: Treatment	CME-LEM2|2011-005684-24	2014-05-01	2016-05-01	2016-05-01	2014-06-18	2019-07-19	2019-07-19	Hospital Puerta de Hierro, Majadahonda, Madrid, Spain		https://ClinicalTrials.gov/show/NCT02165904
NCT02176928	Sleep-Disordered Breathing in Chronic SCI		Completed	Has Results	Spinal Cord Injury|Sleep Apnea, Obstructive	Device: AutoPAP|Device: Sham PAP	Cognitive Functioning as Measured by PASAT	University of Miami|United States Department of Defense|Wayne State University	All	18 Years and older ¬† (Adult, Older Adult)	Not Applicable	42	Other|U.S. Fed	Interventional	Allocation: Randomized|Intervention Model: Parallel Assignment|Masking: Triple (Participant, Care Provider, Outcomes Assessor)|Primary Purpose: Treatment	20130161|# W81XWH-13-1-0479	2014-05-01	2018-09-30	2018-09-30	2014-06-27	2020-11-02	2020-11-02	Miami VA Hospital, Miami, Florida, United States|Miami Project to Cure Paralysis, University of Miami Miller School of Medicine, Miami, Florida, United States|John D Dingell VA Medical Center, Detroit, Michigan, United States|Wayne State University, Detroit, Michigan, United States	Study Protocol and Statistical Analysis Plan, https://ClinicalTrials.gov/ProvidedDocs/28/NCT02176928/Prot_SAP_000.pdf	https://ClinicalTrials.gov/show/NCT02176928
NCT02322125	Restoring Walking With a Powered Exoskeleton After Spinal Cord Injury		Completed	Has Results	Spinal Cord Injury	Device: ReWalk	Physiological Cost Index (PCI) Ratio|10 Meter Walk Test|Max Distance|Limits of Stability - Sitting|Sitting Sway|McGill Pain Questionnaire|Spinal Cord Assessment Tool for Spastic Reflexes (SCATS)|Motor Evoked Potentials|Change From Baseline in Manual Muscle Test at End of Training	University of Alberta	All	18 Years to 70 Years ¬† (Adult, Older Adult)	Not Applicable	12	Other	Interventional	Allocation: N/A|Intervention Model: Single Group Assignment|Masking: None (Open Label)|Primary Purpose: Treatment	Pro00036789	2014-06-01	2018-08-20	2018-09-26	2014-12-22	2021-10-14	2021-10-14	University of Alberta, Edmonton, Alberta, Canada	Study Protocol and Statistical Analysis Plan, https://ClinicalTrials.gov/ProvidedDocs/25/NCT02322125/Prot_SAP_000.pdf	https://ClinicalTrials.gov/show/NCT02322125
NCT02202538	Indego¬Æ Exoskeleton; Assessing Mobility for Persons With Spinal Cord Injury (SCI).	Indego	Completed	Has Results	Spinal Cord Injury	Device: Indego	Percentage of Subjects Able to Complete the 600 Meter Walk Test (600MWT)|Average Speed of 10 Meter Walk Test (10MWT) Mid Study Versus End of Study|Timed Up and Go (TUG) Test|Average Time to Don/Doff Device|Percentage of Subjects That Could Don/Doff the Device Independently|Walking Index for Spinal Cord Injury (WISCI-II) Assessment|Functional Independence Measure (FIM) Score for Walking Indoors|Bo…	Parker Hannifin Corporation	All	18 Years to 80 Years ¬† (Adult, Older Adult)	Not Applicable	53	Industry	Interventional	Allocation: N/A|Intervention Model: Single Group Assignment|Masking: None (Open Label)|Primary Purpose: Treatment	PH-IND01	2014-08-01	2015-10-01	2015-10-01	2014-07-29	2016-12-20	2017-07-25	Craig Hospital, Englewood, Colorado, United States|Shepherd Center, Atlanta, Georgia, United States|Rehabilitation Institue of Chicago, Chicago, Illinois, United States|Kessler Institute for Rehabilitation, West Orange, New Jersey, United States|RUSK Rehabilitation Center, New York, New York, United States		https://ClinicalTrials.gov/show/NCT02202538
NCT02008149	FES Rowing for Skeletal Health After SCI	FES-R	Completed	Has Results	Spinal Cord Injury	Other: Rowing exercise	Bone Mineral Density	VA Office of Research and Development	All	18 Years and older ¬† (Adult, Older Adult)	Not Applicable	9	U.S. Fed	Interventional	Allocation: Non-Randomized|Intervention Model: Parallel Assignment|Masking: None (Open Label)|Primary Purpose: Treatment	B1410-P|5I21RX001410-02	2014-11-01	2018-12-04	2018-12-04	2013-12-11	2019-10-25	2019-10-25	VA Palo Alto Health Care System, Palo Alto, CA, Palo Alto, California, United States	Study Protocol, Statistical Analysis Plan, and Informed Consent Form, https://ClinicalTrials.gov/ProvidedDocs/49/NCT02008149/Prot_SAP_ICF_000.pdf	https://ClinicalTrials.gov/show/NCT02008149
NCT02325414	Prevention of Bone Loss After Acute SCI by Zoledronic Acid		Completed	Has Results	Spinal Cord Injury|Acute Spinal Cord Injury|Bone Loss|Osteoporosis	Drug: Zoledronic acid|Drug: Placebo	Percent Change in Bone Mass Density (BMD) in the Hip|Percent Change of Bone Mass Density (BMD) in the Femoral Neck|Percent Change in the Epiphyseal Integral Bone Mass Content (iBMC) of the Femur|Percent Change in the Metaphyseal Integral Bone Mass Content (iBMC) of the Femur	Northwestern University|United States Department of Defense	All	18 Years and older ¬† (Adult, Older Adult)	Phase 2	60	Other|U.S. Fed	Interventional	Allocation: Randomized|Intervention Model: Parallel Assignment|Masking: Quadruple (Participant, Care Provider, Investigator, Outcomes Assessor)|Primary Purpose: Prevention	STU00098239|A-18350	2015-02-01	2020-08-25	2020-08-25	2014-12-25	2021-06-02	2021-06-29	Northwestern University Feinberg School of Medicine, Chicago, Illinois, United States|Rehabilitation Institute of Chicago, Chicago, Illinois, United States	Study Protocol, https://ClinicalTrials.gov/ProvidedDocs/14/NCT02325414/Prot_001.pdf|"Statistical Analysis Plan", https://ClinicalTrials.gov/ProvidedDocs/14/NCT02325414/SAP_002.pdf	https://ClinicalTrials.gov/show/NCT02325414
NCT02302157	Dose Escalation Study of AST-OPC1 in Spinal Cord Injury		Completed	Has Results	Cervical Spinal Cord Injury|Spine Injury|Spinal Cord Trauma	Biological: AST-OPC1	Number of Adverse Events Within 1 Year (365 Days) That Are Related to AST-OPC1 Injection|Neurological Function as Measured by Upper Extremity Motor Scores and Motor Level on International Standards for Neurological Classification of Spinal Cord Injury (ISNCSCI) Examinations as Secondary End Point - 365 Days After Injection of AST-OPC1	Lineage Cell Therapeutics, Inc.	All	18 Years to 69 Years ¬† (Adult, Older Adult)	Phase 1|Phase 2	25	Industry	Interventional	Allocation: N/A|Intervention Model: Single Group Assignment|Masking: None (Open Label)|Primary Purpose: Treatment	AST-OPC1-01	2015-03-01	2018-12-01	2018-12-01	2014-11-26	2021-07-13	2021-07-14	Univ. of California at San Diego, La Jolla, California, United States|Rancho Los Amigos/USC, Los Angeles, California, United States|Stanford University/Santa Clara Valley Medical Center, San Jose, California, United States|Shepherd Center, Atlanta, Georgia, United States|Rush University Medical Center, Chicago, Illinois, United States|Indiana University, Indianapolis, Indiana, United States|Washi…	Study Protocol, https://ClinicalTrials.gov/ProvidedDocs/57/NCT02302157/Prot_000.pdf|"Statistical Analysis Plan", https://ClinicalTrials.gov/ProvidedDocs/57/NCT02302157/SAP_001.pdf	https://ClinicalTrials.gov/show/NCT02302157
NCT02441179	Acute Intermittent Hypoxia and Body Weight Supported Treadmill Training for Incomplete Spinal Cord Injury Patients		Completed	Has Results	Spinal Cord Injuries	Other: Acute Intermittent Hypoxia|Other: Body weight-assisted treadmill training|Other: Sham Protocol	Gait Speed With 10-Meter Walk Test|Gait Endurance With the 6-Minute Walk Test|Gait Speed With the Timed up and go Test|Percentage of Subjects With Worsening Muscle Tone on the Ashworth Scale|Percentage of Subjects With Worsening Pain Perception on the "The Visual Analog Test"|Learning and Memory With the Rey-Osterrieth Complex Figure (ROCF) Test|Learning and Memory With the Complutense Verbal Lea…	Sociedad Pro Ayuda del Ni√±o Lisiado|Hospital Clinico Mutual de Seguridad	All	18 Years and older ¬† (Adult, Older Adult)	Not Applicable	35	Other	Interventional	Allocation: Randomized|Intervention Model: Parallel Assignment|Masking: Quadruple (Participant, Care Provider, Investigator, Outcomes Assessor)|Primary Purpose: Treatment	27	2015-03-01	2015-10-01	2015-10-01	2015-05-12	2016-05-27	2016-05-27	Hospital Mutual de Seguridad, Santiago, Metropolitana, Chile|Instituto de Rehabilitaci√≥n Infantil Telet√≥n, Santiago, Chile		https://ClinicalTrials.gov/show/NCT02441179
NCT02473614	Efficacy Study of the Music Glove Patients With Spinal Cord Injuries		Completed	Has Results	Spinal Cord Injuries	Device: Music Glove|Other: Conventional Hand Exercise Program	Box and Blocks Test|Graded Redefined Assessment of Strength, Sensibility and Prehension (GRASSP)	University of California, Irvine	All	18 Years to 80 Years ¬† (Adult, Older Adult)	Not Applicable	11	Other	Interventional	Allocation: Randomized|Intervention Model: Crossover Assignment|Masking: Single (Outcomes Assessor)|Primary Purpose: Treatment	2R44HD074331-02 [2008-6432]|2R44HD074331-02	2015-03-01	2016-06-01	2016-06-01	2015-06-16	2021-06-07	2021-06-07	University of California, Irvine, Irvine, California, United States		https://ClinicalTrials.gov/show/NCT02473614
NCT02488824	Effect of Heat Exposure on Cognition in Persons With Tetraplegia		Completed	Has Results	Tetraplegia|Hypothermia|Mild Cognitive Impairment	Procedure: Warm Temperature	Change in Core Body Temperature From Baseline to 120 Minutes Post Warm Challenge|Change in Cognitive Performance From Baseline to 120 Minutes Post Warm Challenge|Change in Distal Skin Temperatures From Baseline to 120 Minutes Post Warm Challenge|Change in Sweat Rate From Baseline to 120 Minutes Post Warm Challenge|Change in Thermal Sensitivity From Baseline to 120 Minutes Post Warm Challenge	VA Office of Research and Development|James J. Peters Veterans Affairs Medical Center	All	18 Years to 68 Years ¬† (Adult, Older Adult)	Not Applicable	41	U.S. Fed	Interventional	Allocation: Non-Randomized|Intervention Model: Parallel Assignment|Masking: None (Open Label)|Primary Purpose: Basic Science	D1734-P|HAN-15-013|01613	2015-04-01	2018-09-04	2018-09-04	2015-07-02	2019-11-01	2019-11-18	James J. Peters VA Medical Center, Bronx, NY, Bronx, New York, United States	Study Protocol and Statistical Analysis Plan, https://ClinicalTrials.gov/ProvidedDocs/24/NCT02488824/Prot_SAP_000.pdf	https://ClinicalTrials.gov/show/NCT02488824
NCT03302793	Combined Peripheral (BreEStim) and Central Electrical Stimulation (tDCS) for Neuropathic Pain Management - Spinal Cord Injury		Completed	Has Results	Pain Management	Device: BreEStim|Device: tDCS|Device: tDCS sham	Pain as Assessed by Visual Analogue Scale (VAS)|Electrical Pain Threshold|Electrical Sensation Threshold	The University of Texas Health Science Center, Houston	All	18 Years to 75 Years ¬† (Adult, Older Adult)	Not Applicable	12	Other	Interventional	Allocation: Randomized|Intervention Model: Crossover Assignment|Masking: Single (Participant)|Primary Purpose: Treatment	HSC-MS-14-0564 SCI	2015-04-01	2017-12-01	2017-12-01	2017-10-05	2019-01-24	2019-01-24	TIRR, Houston, Texas, United States	Study Protocol and Statistical Analysis Plan, https://ClinicalTrials.gov/ProvidedDocs/93/NCT03302793/Prot_SAP_000.pdf	https://ClinicalTrials.gov/show/NCT03302793
NCT02417532	Safety and Feasibility Evaluation of Robot Assisted Physiotherapy Exercises With REX	RAPPER II	Completed	Has Results	Spinal Cord Injury	Device: Rehabilitation using REX	Ability to Transfer|Adverse Events|Transfer Time|Participant Satisfaction Questionnaire|Timed up and go Test- Ability to Stand From Chair	Rex Bionics Plc|Generic Devices Consulting, Inc.	All	10 Years to 90 Years ¬† (Child, Adult, Older Adult)	Not Applicable	56	Industry	Interventional	Allocation: N/A|Intervention Model: Single Group Assignment|Masking: None (Open Label)|Primary Purpose: Supportive Care	RXPR-0001	2015-05-01	2016-12-01	2016-12-01	2015-04-15	2017-02-17	2019-07-23	Austin Health, Heidelberg, Victoria, Australia|Rehabilitation Innovation Centre at AUT University, Auckland, New Zealand|Canterbury District Health Board, Burwood Hospital, Christchurch, New Zealand|East Kent Hospitals University Foundation Trust, Canterbury, Kent, United Kingdom|Royal National Orthopaedic Hospital NHS Trust, Stanmore, Middlesex, United Kingdom|Physiofunction, Moulton, Northampto…		https://ClinicalTrials.gov/show/NCT02417532
NCT02458469	Role of Enhancing Serotonin Receptors Activity for Sleep Apnea Treatment in Patients With SCI	REST-SCI	Completed	Has Results	Spinal Cord Injury|Sleep Disordered Breathing	Drug: Buspirone|Drug: Trazodone|Drug: Placebo	CO2 Reserve (Delta-PETCO2-AT)|Apnea-Hypopnea Index (AHI)	VA Office of Research and Development	All	18 Years and older ¬† (Adult, Older Adult)	Phase 2	15	U.S. Fed	Interventional	Allocation: Randomized|Intervention Model: Crossover Assignment|Masking: Single (Participant)|Primary Purpose: Basic Science	NURC-062-12S|1IK2CX000547	2015-05-14	2019-04-12	2019-04-12	2015-06-01	2020-04-09	2021-06-14	John D. Dingell VA Medical Center, Detroit, MI, Detroit, Michigan, United States	Study Protocol and Statistical Analysis Plan, https://ClinicalTrials.gov/ProvidedDocs/69/NCT02458469/Prot_SAP_000.pdf	https://ClinicalTrials.gov/show/NCT02458469
NCT02455336	Fenofibrate Treatment in SCI		Completed	Has Results	Spinal Cord Injury|Dyslipidemia	Drug: Fenofibrate|Other: No intervention	Triglyceride Concentration (Percent Change From Baseline)	VA Office of Research and Development	All	21 Years to 69 Years ¬† (Adult, Older Adult)	Phase 2|Phase 3	23	U.S. Fed	Interventional	Allocation: Randomized|Intervention Model: Parallel Assignment|Masking: None (Open Label)|Primary Purpose: Treatment	B1925-P	2015-05-18	2018-08-01	2018-08-01	2015-05-27	2019-06-26	2019-06-26	Kessler Institute for Rehabilitation, West Orange, New Jersey, United States|James J. Peters VA Medical Center, Bronx, NY, Bronx, New York, United States	Study Protocol and Statistical Analysis Plan, https://ClinicalTrials.gov/ProvidedDocs/36/NCT02455336/Prot_SAP_000.pdf	https://ClinicalTrials.gov/show/NCT02455336
NCT02748317	Impact of Probiotics on Urinary Symptoms in Spinal Cord Injury SCI and SB		Completed	Has Results	Lower Urinary Tract Symptoms	Drug: Lactobacillus rhamnosus GG	Lactobacillus Safety|Lactobacillus Tolerability	Medstar Health Research Institute|Patient-Centered Outcomes Research Institute|Georgetown University|Children's National Research Institute	All	18 Years and older ¬† (Adult, Older Adult)	Phase 2	96	Other	Interventional	Allocation: N/A|Intervention Model: Single Group Assignment|Masking: None (Open Label)|Primary Purpose: Prevention	2014-211	2016-01-01	2018-10-31	2018-10-31	2016-04-22	2020-05-12	2020-05-12	Children's National Medical Center, Washington, District of Columbia, United States|MedStar National Rehabilitation Hospital, Washington, District of Columbia, United States	Study Protocol and Statistical Analysis Plan, https://ClinicalTrials.gov/ProvidedDocs/17/NCT02748317/Prot_SAP_000.pdf	https://ClinicalTrials.gov/show/NCT02748317
NCT02748356	Impact of Probiotics on Urinary Symptoms in Spinal Cord Injury SCI and SB		Completed	Has Results	Lower Urinary Tract Symptoms	Drug: Lactobacillus	Lactobacillus Safety|Lactobacillus Tolerability	Medstar Health Research Institute|Patient-Centered Outcomes Research Institute|Children's National Research Institute|Georgetown University	All	6 Years and older ¬† (Child, Adult, Older Adult)	Phase 2	7	Other	Interventional	Allocation: N/A|Intervention Model: Single Group Assignment|Masking: None (Open Label)|Primary Purpose: Prevention	5753	2016-01-01	2018-10-21	2018-12-31	2016-04-22	2020-04-24	2020-04-24	Children's National Medical Center, Washington, District of Columbia, United States|MedStar National Rehabilitation Hospital, Washington, District of Columbia, United States	Study Protocol and Statistical Analysis Plan, https://ClinicalTrials.gov/ProvidedDocs/56/NCT02748356/Prot_SAP_000.pdf	https://ClinicalTrials.gov/show/NCT02748356
NCT02701777	Enhancing STDP After Spinal Cord Injury		Completed	Has Results	Spinal Cord Injury	Device: STDP|Other: Training|Device: Sham STDP	Amplitude of Motor Evoked Potential (MEP) From TMS|Maximum Voluntary Contraction|The Graded Redefined Assessment of Strength Sensibility and Prehension (GRASSP)	VA Office of Research and Development	All	18 Years to 85 Years ¬† (Adult, Older Adult)	Not Applicable	44	U.S. Fed	Interventional	Allocation: Randomized|Intervention Model: Parallel Assignment|Masking: Single (Participant)|Primary Purpose: Treatment	B1807-R	2016-03-01	2020-10-30	2020-10-30	2016-03-08	2021-01-20	2021-01-20	Edward Hines Jr. VA Hospital, Hines, IL, Hines, Illinois, United States	Study Protocol and Statistical Analysis Plan, https://ClinicalTrials.gov/ProvidedDocs/77/NCT02701777/Prot_SAP_000.pdf	https://ClinicalTrials.gov/show/NCT02701777
NCT02768103	Neural Adaptation After Tendon Transfer and Training in Tetraplegia		Completed	Has Results	Spinal Cord Injury	Behavioral: task-based training	Pinch Force|Functional MRI BOLD Signal From Motor Cortex|Fine-wire Electromyography of Transferred Brachioradialis Muscle (to Paralyzed Thumb Flexor)	VA Office of Research and Development	All	18 Years and older ¬† (Adult, Older Adult)	Not Applicable	5	U.S. Fed	Interventional	Allocation: N/A|Intervention Model: Single Group Assignment|Masking: None (Open Label)|Primary Purpose: Treatment	N1772-P	2016-05-01	2018-06-30	2018-06-30	2016-05-11	2020-04-15	2020-04-15	VA Palo Alto Health Care System, Palo Alto, CA, Palo Alto, California, United States	Study Protocol and Statistical Analysis Plan, https://ClinicalTrials.gov/ProvidedDocs/03/NCT02768103/Prot_SAP_000.pdf	https://ClinicalTrials.gov/show/NCT02768103
NCT02573402	The Effects Upon the Bladder of Transcutaneous Tibial Nerve Stimulation in Acute Traumatic Spinal Cord Injury		Completed	Has Results	Spinal Cord Injury|Neurogenic Bladder	Device: Transcutaneous Tibial Nerve Stimulation|Device: Control	Number of Participants With Infection|Number of Participants With Skin Irritation|Number of Participants Who Were Unexpectedly Discharged to an Acute Care Hospital|Mean Change in Pain Score as Indicated by Numeric Pain Scale (NPS)|Maximum Detrusor Pressure as Evaluated by Urodynamic Study|Maximum Bladder Capacity as Evaluated by Urodynamic Study	The University of Texas Health Science Center, Houston|The Institute for Rehabilitation and Research (TIRR)|Baylor College of Medicine|Case Western Reserve University|University of Houston	All	18 Years to 65 Years ¬† (Adult, Older Adult)	Not Applicable	19	Other	Interventional	Allocation: Randomized|Intervention Model: Parallel Assignment|Masking: Single (Participant)|Primary Purpose: Treatment	HSC-MS-15-0806	2016-07-12	2017-10-27	2017-10-27	2015-10-09	2018-09-10	2018-09-10	The University of Texas Health Science Center at Houston, Houston, Texas, United States	Study Protocol and Statistical Analysis Plan, https://ClinicalTrials.gov/ProvidedDocs/02/NCT02573402/Prot_SAP_000.pdf	https://ClinicalTrials.gov/show/NCT02573402
NCT02881957	Hypovitaminosis D in Neurocritical Patients		Completed	Has Results	Craniocerebral Trauma|Intracranial Aneurysm|Brain Neoplasms|Spinal Cord Injuries|Seizures|Meningitis|Stroke|Intracranial Hemorrhages|Critical Illness|Vitamin d Deficiency	Drug: Cholecalciferol|Other: Placebo	Intent-to-treat Hospital Length-of-stay|As-treated Hospital Length of Stay|Intent-to-treat ICU Length of Stay|As-treated ICU Length of Stay|In-hospital Mortality|Number of Participants With Study Drug Related Adverse Events|Number of Participants With Sepsis|Number of Participants With Pneumonia|Number of Participants With Urinary Tract Infection|Number of Participants With Deep Vein Thrombosis	University of Utah	All	18 Years and older ¬† (Adult, Older Adult)	Phase 2|Phase 3	274	Other	Interventional	Allocation: Randomized|Intervention Model: Parallel Assignment|Masking: Quadruple (Participant, Care Provider, Investigator, Outcomes Assessor)|Primary Purpose: Treatment	IRB_00091541	2016-10-10	2018-10-10	2018-10-10	2016-08-29	2020-08-17	2020-08-17	University of Utah Hospital, Salt Lake City, Utah, United States	Informed Consent Form, https://ClinicalTrials.gov/ProvidedDocs/57/NCT02881957/ICF_000.pdf|"Study Protocol and Statistical Analysis Plan", https://ClinicalTrials.gov/ProvidedDocs/57/NCT02881957/Prot_SAP_001.pdf	https://ClinicalTrials.gov/show/NCT02881957
NCT02973438	Effects of Intermittent Hypoxia (IH) on Metabolism and Dysglycemia, in Overweight/Obese Persons SCI		Completed	Has Results	Spinal Cord Injuries|Obesity|Insulin Resistance	Device: Intermittent Hypoxia (IH)|Device: SHAM	Change in Cardioendocrine Risk by Surrogate Blood Measures of the Homeostasis Model Assessment - Insulin Resistance (HOMA 2-IR)|Change in Exercise Substrate Partitioning as Measured Via VO2 Peak Test	University of Miami	All	18 Years to 60 Years ¬† (Adult)	Not Applicable	6	Other	Interventional	Allocation: Randomized|Intervention Model: Crossover Assignment|Masking: Single (Participant)|Primary Purpose: Treatment	20160818	2016-12-01	2018-12-01	2018-12-01	2016-11-25	2020-12-17	2020-12-17	The Miami Project to Cure Paralysis, Miami, Florida, United States	Study Protocol and Statistical Analysis Plan, https://ClinicalTrials.gov/ProvidedDocs/38/NCT02973438/Prot_SAP_000.pdf	https://ClinicalTrials.gov/show/NCT02973438
NCT04799782	Role of Mirtazapine in Ameliorating Sleep Disordered Breathing		Completed	Has Results	Spinal Cord Injuries|Sleep Disordered Breathing	Drug: Mirtazapine|Drug: Placebo	CO2 Reserve (Delta-PETCO2-AT)|AHI (Apnea/Hypopnea Index)	Wayne State University	All	18 Years and older ¬† (Adult, Older Adult)	Phase 2	18	Other	Interventional	Allocation: Randomized|Intervention Model: Crossover Assignment|Masking: Single (Participant)|Primary Purpose: Other	100712M1F(V)	2017-01-01	2019-05-18	2019-05-18	2021-03-16	2021-04-20	2021-06-15		Study Protocol, https://ClinicalTrials.gov/ProvidedDocs/82/NCT04799782/Prot_000.pdf|"Statistical Analysis Plan", https://ClinicalTrials.gov/ProvidedDocs/82/NCT04799782/SAP_001.pdf	https://ClinicalTrials.gov/show/NCT04799782
NCT03070431	High-precision Radiotherapy of Motor Deficits Due to Metastatic Spinal Cord Compression	PRE-MODE	Completed	Has Results	Spinal Cord Compression Due to Metastasis to Spine	Radiation: High-precision RT 5x5 Gy in 1 week	Number of Participants Who Were Alive at 6 Months After Radiotherapy Without Deterioration of Motor Function During (or Directly After) Radiotherapy and Freedom From In-field Recurrence of Metastatic Spinal Cord Compression Following Radiotherapy|Number of Participants Showing Improvement of Motor Deficits Following Radiotherapy (Best Response)|Number of Participants Showing Improvement of Sensor…	University Hospital Schleswig-Holstein	All	18 Years and older ¬† (Adult, Older Adult)	Not Applicable	44	Other	Interventional	Allocation: N/A|Intervention Model: Single Group Assignment|Masking: None (Open Label)|Primary Purpose: Treatment	PRE-MODE	2017-01-15	2019-02-28	2019-02-28	2017-03-03	2020-03-03	2020-03-03	Department of Radiation Oncology, University of L√ºbeck and University Medical Center Schleswig-Holstein, Ratzeburger Allee 160, 23562 L√ºbeck, Germany, Lubeck Hansestadt, Germany	Study Protocol, Statistical Analysis Plan, and Informed Consent Form, https://ClinicalTrials.gov/ProvidedDocs/31/NCT03070431/Prot_SAP_ICF_000.pdf	https://ClinicalTrials.gov/show/NCT03070431
NCT02862080	Combining tsDCS and Exoskeleton Gait Training on Spinal Excitability in SCI		Completed	Has Results	Spinal Cord Injury	Device: cathode tsDCS|Device: Ekso|Device: anode tsDCS	Change in Spinal Cord Excitability as Measured by Percent Change in Soleus H-Reflex From Beginning of Session to End of the Same Session|Change in Spinal Cord Excitability as Assessed by Percent Change in Soleus H-Reflex From Beginning of Session to End of the Same Session|Gait Speed as Assessed by 10 Meter Walk Test	The University of Texas Health Science Center, Houston|TIRR Memorial Hermann	All	18 Years and older ¬† (Adult, Older Adult)	Not Applicable	4	Other	Interventional	Allocation: Randomized|Intervention Model: Crossover Assignment|Masking: None (Open Label)|Primary Purpose: Treatment	HSC-MS-16-0329	2017-02-13	2017-11-17	2017-11-17	2016-08-10	2021-01-20	2021-01-20	NeuroRecovery Research Center at TIRR Memorial Hermann, Houston, Texas, United States	Study Protocol and Statistical Analysis Plan, https://ClinicalTrials.gov/ProvidedDocs/80/NCT02862080/Prot_SAP_000.pdf	https://ClinicalTrials.gov/show/NCT02862080
NCT02865343	Ventilatory Support to Improve Exercise Training in High Level Spinal Cord Injury	NIV-Ex	Completed	Has Results	Spinal Cord Injury	Device: Non-invasive Ventilation(NIV)|Device: Sham Non-invasive ventilation(NIV)	Change in Baseline Aerobic Capacity After 3 Months of FES-row Training.|Change in Peak Cardiac Output After 3 Months of FES-row Training.|Change in Baseline Peak Minute Ventilation During Exercise After 3 Months of FES-row Training	Spaulding Rehabilitation Hospital	All	18 Years to 60 Years ¬† (Adult)	Not Applicable	11	Other	Interventional	Allocation: Randomized|Intervention Model: Parallel Assignment|Masking: Quadruple (Participant, Care Provider, Investigator, Outcomes Assessor)|Primary Purpose: Treatment	SpauldingRH	2017-02-22	2019-06-28	2019-06-28	2016-08-12	2020-07-30	2020-07-30	Spaulding Hospital Cambridge, Cambridge, Massachusetts, United States	Study Protocol and Statistical Analysis Plan, https://ClinicalTrials.gov/ProvidedDocs/43/NCT02865343/Prot_SAP_000.pdf|"Informed Consent Form", https://ClinicalTrials.gov/ProvidedDocs/43/NCT02865343/ICF_001.pdf	https://ClinicalTrials.gov/show/NCT02865343
NCT03237234	Enhancing Corticospinal Activation for Improved Walking Function		Completed	Has Results	Spinal Cord Injuries	Other: Motor Skill Training|Device: Transcranial direct current stimulation (tDCS)	10 Meter Walk Test (Walk Speed)|Spatiotemporal Gait Characteristic (Cadence)|Spatiotemporal Gait Characteristic (Stride Length - Weaker Limb)|Spatiotemporal Gait Characteristic (Stride Length - Stronger Limb)|Spatiotemporal Gait Characteristic (Step Length Symmetry - Symmetry Index)|Maximal Isometric Dorsiflexor Strength|Berg Balance Scale|Falls Efficacy Scale-International Version (FES-I)|Spinal…	Shepherd Center, Atlanta GA|National Institute on Disability, Independent Living, and Rehabilitation Research	All	18 Years to 65 Years ¬† (Adult, Older Adult)	Not Applicable	25	Other|U.S. Fed	Interventional	Allocation: Randomized|Intervention Model: Parallel Assignment|Masking: Triple (Participant, Investigator, Outcomes Assessor)|Primary Purpose: Treatment	SCIMS1-703	2017-03-01	2020-03-01	2021-07-01	2017-08-02	2021-10-14	2021-10-14	Shepherd Center, Inc., Atlanta, Georgia, United States	Study Protocol and Statistical Analysis Plan, https://ClinicalTrials.gov/ProvidedDocs/34/NCT03237234/Prot_SAP_001.pdf	https://ClinicalTrials.gov/show/NCT03237234
NCT02998021	Effect of Vibration Exercise on Upper Limb Strength, Function, and Pain		Completed	Has Results	Spinal Cord Injuries	Device: Vibrating Dumbbell|Device: Standard Dumbbell	Change in Strength|Change in Upper Extremity Pain|Change in General Health Measures|Changes in Functional Shoulder Pain|Change in Peak Speed|Change in Acceleration|Change in Peak Force|Change in Mechanical Effective Force|Wheelchair Transfer Ability|Power Output	Alicia Koontz|University of Pittsburgh	All	18 Years to 65 Years ¬† (Adult, Older Adult)	Not Applicable	10	Other	Interventional	Allocation: Randomized|Intervention Model: Parallel Assignment|Masking: None (Open Label)|Primary Purpose: Other	PRO16010169	2017-03-15	2018-11-20	2018-11-20	2016-12-20	2019-12-23	2019-12-23	University of Pittsburgh, Pittsburgh, Pennsylvania, United States	Study Protocol and Statistical Analysis Plan, https://ClinicalTrials.gov/ProvidedDocs/21/NCT02998021/Prot_SAP_000.pdf	https://ClinicalTrials.gov/show/NCT02998021
NCT02830074	Treatment of Sleep-disordered Breathing in Patients With SCI		Completed	Has Results	Spinal Cord Injury|Sleep-disordered Breathing|Spinal Cord Disease|Multiple Sclerosis	Behavioral: Best practices PAP + patient Education +ongoing Support and Training|Behavioral: Sleep Education	PAP Adherence|Subjective Sleep Quality Was Measured by The Pittsburgh Sleep Quality Index (PSQI)|Quality of Life Was Measured by WHO-QOL BREF Questionnaire|Respiratory Function: Spirometry and Respiratory Muscle Force|Functional Status Was Measured by CHART Questionnaire.|Depressive Symptom Severity|Fatigue Symptoms|Epworth Sleepiness Scale	VA Office of Research and Development	All	18 Years and older ¬† (Adult, Older Adult)	Not Applicable	73	U.S. Fed	Interventional	Allocation: Randomized|Intervention Model: Parallel Assignment|Masking: Double (Participant, Outcomes Assessor)|Primary Purpose: Treatment	B2116-R|IRX002116A	2017-05-01	2019-09-30	2020-03-30	2016-07-12	2021-04-22	2021-05-19	John D. Dingell VA Medical Center, Detroit, MI, Detroit, Michigan, United States	Study Protocol, https://ClinicalTrials.gov/ProvidedDocs/74/NCT02830074/Prot_002.pdf|"Statistical Analysis Plan", https://ClinicalTrials.gov/ProvidedDocs/74/NCT02830074/SAP_000.pdf|"Informed Consent Form", https://ClinicalTrials.gov/ProvidedDocs/74/NCT02830074/ICF_001.pdf	https://ClinicalTrials.gov/show/NCT02830074
NCT03317288	Alternating Pressure Overlay on Weight Bearing Tissue Tolerance in People With Spinal Cord Injury		Completed	Has Results	Spinal Cord Injuries|Pressure Ulcer	Device: Dabir Air overlay	Sacral Skin Blood Flow During Supine Lying|Heel Skin Blood Flow During Supine Lying|Sacral Peak Interface Pressure During Supine Lying|Sacral Averaged Interface Pressure During Supine Lying|Heel Peak Interface Pressure During Supine Lying|Heel Averaged Interface Pressure During Supine Lying|Post Alternating Pressure Sacral Skin Blood Flow|Post Alternating Pressure Sacral Peak Interface Pressure|P…	University of Illinois at Chicago|Dabir Surfaces Inc	All	18 Years to 65 Years ¬† (Adult, Older Adult)	Not Applicable	15	Other|Industry	Interventional	Allocation: N/A|Intervention Model: Single Group Assignment|Masking: None (Open Label)|Primary Purpose: Prevention	2017-0215	2017-05-12	2019-03-31	2019-03-31	2017-10-23	2021-06-09	2021-06-09	University of Illinois at Chicago, Chicago, Illinois, United States	Study Protocol and Statistical Analysis Plan, https://ClinicalTrials.gov/ProvidedDocs/88/NCT03317288/Prot_SAP_000.pdf|"Informed Consent Form", https://ClinicalTrials.gov/ProvidedDocs/88/NCT03317288/ICF_001.pdf	https://ClinicalTrials.gov/show/NCT03317288
NCT03267212	Acute Effect of Ventilatory Support During Exercise in Spinal Cord Injury	NIV-Ex-CS	Completed	Has Results	Spinal Cord Injury	Device: Non-invasive ventilation(NIV)|Device: Sham Non-invasive ventilation(NIV)|Other: Functional Electrical Stimulation Row Training (FESRT)	Change in Peak Aerobic Capacity During FES-row Testing|Change in Cardiac Output During FES-row Testing|Change in Minute Ventilation During FES-row Testing|Change in Tidal Volume During FES-row Testing	Spaulding Rehabilitation Hospital	All	18 Years to 70 Years ¬† (Adult, Older Adult)	Not Applicable	15	Other	Interventional	Allocation: Randomized|Intervention Model: Crossover Assignment|Masking: Quadruple (Participant, Care Provider, Investigator, Outcomes Assessor)|Primary Purpose: Treatment	SpauldingRH-2	2017-07-14	2019-02-01	2019-04-01	2017-08-30	2020-03-30	2020-04-09	Spaulding Hospital Cambridge, Cambridge, Massachusetts, United States	Study Protocol and Statistical Analysis Plan, https://ClinicalTrials.gov/ProvidedDocs/12/NCT03267212/Prot_SAP_000.pdf|"Informed Consent Form", https://ClinicalTrials.gov/ProvidedDocs/12/NCT03267212/ICF_001.pdf	https://ClinicalTrials.gov/show/NCT03267212
NCT03249454	Effects of Transcutaneous Spinal Direct Current Stimulation in Incomplete Spinal Cord Injury		Completed	Has Results	Incomplete Spinal Cord Injury	Device: Anodal tsDCS|Device: Cathodal tsDCS|Device: Sham tsDCS	Percent Change in Hmax|Change in Somatosensory Evoked Potential (SSEP)|Change Systolic Blood Pressure|Change in Diastolic Blood Pressure|Change in Heart Rate	The University of Texas Health Science Center, Houston|TIRR/Mission Connect	All	18 Years to 65 Years ¬† (Adult, Older Adult)	Not Applicable	15	Other	Interventional	Allocation: Randomized|Intervention Model: Crossover Assignment|Masking: Triple (Participant, Investigator, Outcomes Assessor)|Primary Purpose: Treatment	HSC-MS-17-0166	2017-08-11	2018-10-26	2018-10-26	2017-08-15	2020-02-13	2020-02-13	The University of Texas Health Science Center at Houston, Houston, Texas, United States	Study Protocol and Statistical Analysis Plan, https://ClinicalTrials.gov/ProvidedDocs/54/NCT03249454/Prot_SAP_000.pdf	https://ClinicalTrials.gov/show/NCT03249454
NCT01915095	Improving Motor Function After Spinal Cord Injury		Completed	Has Results	Spinal Cord Injury	Device: rTMS|Device: Sham rTMS|Other: Training|Other: Motor Task	Physiology Measurements Before and After rTMS/Sham rTMS Protocol- Changes in Amplitude of Motor Evoked Potential (MEP) From TMS|Electromyography (EMG)|The Jebsen Taylor Hand Function Test (JTT)	VA Office of Research and Development	All	18 Years to 85 Years ¬† (Adult, Older Adult)	Not Applicable	42	U.S. Fed	Interventional	Allocation: Randomized|Intervention Model: Crossover Assignment|Masking: Single (Participant)|Primary Purpose: Treatment	B0815-R	2017-09-01	2019-09-01	2019-09-01	2013-08-02	2020-11-04	2021-06-11	Miami VA Healthcare System, Miami, FL, Miami, Florida, United States|Edward Hines Jr. VA Hospital, Hines, IL, Hines, Illinois, United States|VA Pittsburgh Healthcare System University Drive Division, Pittsburgh, PA, Pittsburgh, Pennsylvania, United States	Study Protocol and Statistical Analysis Plan, https://ClinicalTrials.gov/ProvidedDocs/95/NCT01915095/Prot_SAP_000.pdf	https://ClinicalTrials.gov/show/NCT01915095
NCT03152110	Feasibility of HIIT in Spinal Cord Injury	HIIT-SCI	Completed	Has Results	Spinal Cord Injuries|Spinal Cord Diseases	Other: HIIT	HIIT Times|Power|Cardiopulmonary Measures|Enjoyment of HIIT|Acceptability of HIIT|Percentage of Participants Completing All Supervised Training Sessions|Perceived Exertion|Perceived Exertion (Adapted)|Feelings During HIIT	University of Pittsburgh|University of Alabama at Birmingham|Eunice Kennedy Shriver National Institute of Child Health and Human Development (NICHD)	All	18 Years to 65 Years ¬† (Adult, Older Adult)	Not Applicable	10	Other|NIH	Interventional	Allocation: N/A|Intervention Model: Single Group Assignment|Masking: None (Open Label)|Primary Purpose: Other	PRO17020277|1P2CHD086851	2018-01-02	2019-08-31	2019-08-31	2017-05-12	2020-11-04	2020-11-04	University of Pittsburgh, Pittsburgh, Pennsylvania, United States	Study Protocol, https://ClinicalTrials.gov/ProvidedDocs/10/NCT03152110/Prot_000.pdf|"Statistical Analysis Plan", https://ClinicalTrials.gov/ProvidedDocs/10/NCT03152110/SAP_001.pdf	https://ClinicalTrials.gov/show/NCT03152110
NCT03458871	Home Neuromodulation of the Neurogenic Bladder in Chronic Spinal Cord Injury With Transcutaneous Tibial Nerve Stimulation	HomeTTNS	Completed	Has Results	Chronic Spinal Cord Injury|Neurogenic Bowel	Device: 4-week TTNS home-based protocol	Safety of Using TTNS at Home Daily as Indicated by Number of Adverse Events Recorded in Bladder Diary|Compliance as Assessed by Number of Days Per Week TTNS Was Used, as Recorded at Home Daily in Bladder Diary|Overall Satisfaction of Daily Use of TTNS at Home|Overall Satisfaction of Daily Use of TTNS at Home as Assessed by a TTNS Satisfaction Survey - Item "TTNS Was Easy to Use"|Overall Satisfact…	The University of Texas Health Science Center, Houston	All	18 Years to 65 Years ¬† (Adult, Older Adult)	Not Applicable	16	Other	Interventional	Allocation: N/A|Intervention Model: Single Group Assignment|Masking: None (Open Label)|Primary Purpose: Treatment	HSC-MS-17-0423	2018-03-13	2019-02-06	2019-02-06	2018-03-08	2020-03-04	2021-10-29	The University of Texas Health Science Center at Houston, Houston, Texas, United States	Study Protocol and Statistical Analysis Plan, https://ClinicalTrials.gov/ProvidedDocs/71/NCT03458871/Prot_SAP_000.pdf	https://ClinicalTrials.gov/show/NCT03458871
NCT02481440	Repeated Subarachnoid Administrations of hUC-MSCs in Treating SCI		Completed	Has Results	Spinal Cord Injuries	Biological: human umbilical cord mesenchymal stem cells (hUC-MSCs)	American Spinal Injury Association (ASIA) Total Score at the Fourth Follow-up|SCI Functional Rating Scale of the International Association of Neurorestoratology (IANR-SCIFRS) Total Score at the Fourth Follow-up|American Spinal Injury Association (ASIA) Total Score|SCI Functional Rating Scale of the International Association of Neurorestoratology (IANR-SCIFRS) Total Score|International Standards t…	Limin Rong|Third Affiliated Hospital, Sun Yat-Sen University	All	18 Years to 65 Years ¬† (Adult, Older Adult)	Phase 1|Phase 2	102	Other	Interventional	Allocation: N/A|Intervention Model: Single Group Assignment|Masking: None (Open Label)|Primary Purpose: Treatment	hUC-MSC-SCI	2018-03-30	2020-03-31	2020-03-31	2015-06-25	2020-06-30	2020-06-30	The Third Affiliated Hospital of Sun Yat-sen University, Guangzhou, Guangdong, China	Study Protocol and Statistical Analysis Plan, https://ClinicalTrials.gov/ProvidedDocs/40/NCT02481440/Prot_SAP_000.pdf	https://ClinicalTrials.gov/show/NCT02481440
NCT03702010	Spinal Cord Stimulation in Patients With Post-Laminectomy Syndrome in Testing Phase		Completed	Has Results	Laminectomy|Post-laminectomy Syndrome|Spinal Cord Syndrome|Failed Back Surgery Syndrome	Device: spinal cord stimulation conventional|Device: spinal cord stimulation experimental	Comparing Visual Analogue Scale (VAS)|Change (%) in VAS Scale at the End of Treatment.|Evaluation Disability|Number of Participants With Adverse Events in Each Arm	Fundaci√≥n Instituto de Estudios de Ciencias de la Salud de Castilla y Le√≥n|Instituto de Investigaci√≥n Biom√©dica de Salamanca	All	18 Years and older ¬† (Adult, Older Adult)	Not Applicable	27	Other	Interventional	Allocation: Randomized|Intervention Model: Crossover Assignment|Masking: Single (Participant)|Primary Purpose: Health Services Research	EST-MED-2018-01|E.C.P.S. 18/1398	2018-11-20	2020-07-01	2020-07-01	2018-10-10	2021-09-01	2021-09-01	Hospital San Pedro de Logro√±o, Logro√±o, La Rioja, Spain|Complejo Asistencial Universitario de Salamanca, Salamanca, Spain	Study Protocol and Statistical Analysis Plan, https://ClinicalTrials.gov/ProvidedDocs/10/NCT03702010/Prot_SAP_000.pdf|"Informed Consent Form", https://ClinicalTrials.gov/ProvidedDocs/10/NCT03702010/ICF_001.pdf	https://ClinicalTrials.gov/show/NCT03702010
NCT04256603	Evaluation of Initiation Time on the Efficacy of Gabapentin in Treating Neuropathic Pain in SCI		Completed	Has Results	Spinal Cord Injuries|Neuropathic Pain	Drug: Gabapentin|Other: No gabapentin	Neuropathic Pain	MetroHealth Medical Center	All	12 Years and older ¬† (Child, Adult, Older Adult)	Phase 4	27	Other	Interventional	Allocation: Non-Randomized|Intervention Model: Parallel Assignment|Masking: None (Open Label)|Primary Purpose: Prevention	IRB19-00117	2019-08-01	2020-03-30	2020-04-01	2020-02-05	2021-11-15	2021-11-15	MetroHealth, Cleveland, Ohio, United States	Study Protocol, Statistical Analysis Plan, and Informed Consent Form, https://ClinicalTrials.gov/ProvidedDocs/03/NCT04256603/Prot_SAP_ICF_002.pdf	https://ClinicalTrials.gov/show/NCT04256603
NCT00001216	Non-Invasive Electrical Stimulation of the Human Brain		Completed	No Results Available	Cerebrovascular Disorders|Healthy|Nervous System Diseases|Spinal Cord Injuries			National Institute of Neurological Disorders and Stroke (NINDS)|National Institutes of Health Clinical Center (CC)	All	Child, Adult, Older Adult		175	NIH	Observational		860020|86-N-0020	1986-02-01		2001-02-01	2002-12-10		2008-03-04	National Institute of Neurological Disorders and Stroke (NINDS), Bethesda, Maryland, United States		https://ClinicalTrials.gov/show/NCT00001216
NCT00004759	Methylprednisolone Given by 24-Hour or 48-Hour Infusion Versus Tirilazad for Acute Spinal Cord Injury		Completed	No Results Available	Spinal Cord Injury	Drug: methylprednisolone|Drug: tirilazad		National Institute of Neurological Disorders and Stroke (NINDS)|Yale University|Office of Rare Diseases (ORD)	All	14 Years and older ¬† (Child, Adult, Older Adult)	Phase 3	497	NIH|Other	Interventional	Allocation: Randomized|Intervention Model: Parallel Assignment|Masking: Double|Primary Purpose: Treatment	199/11692|YALESM-5908	1991-12-01	2007-08-01		2000-02-25		2008-09-10			https://ClinicalTrials.gov/show/NCT00004759
NCT00589199	Functional Electrical Stimulation for Production of Artificial Cough		Completed	No Results Available	Spinal Cord Injuries|Paralysis	Procedure: Placement and use of the device	Measurements of airway pressure and expiratory flow rate to evaluate efficacy of cough|Incidence of respiratory complications	MetroHealth Medical Center	All	18 Years to 65 Years ¬† (Adult, Older Adult)	Not Applicable	5	Other	Interventional	Allocation: N/A|Intervention Model: Single Group Assignment|Masking: None (Open Label)|Primary Purpose: Treatment	IRB93-00133	1993-12-01	2010-01-01	2010-01-01	2008-01-09		2019-08-02	MetroHealth Medical Center, Cleveland, Ohio, United States		https://ClinicalTrials.gov/show/NCT00589199
NCT00004812	Phase II Randomized Pilot Study of Body Weight Support and Treadmill Training for Chronic Thoracic Spinal Cord Injury		Completed	No Results Available	Spinal Cord Injury	Behavioral: Exercise		National Institute of Neurological Disorders and Stroke (NINDS)|University of California, Los Angeles|Office of Rare Diseases (ORD)	All	16 Years to 60 Years ¬† (Child, Adult)	Phase 2	26	NIH|Other	Interventional	Primary Purpose: Treatment	199/12017|UCLA-9202060	1995-07-01			2000-02-25		2005-06-24			https://ClinicalTrials.gov/show/NCT00004812
NCT00006428	Chronic Pain in Spinal Cord Injury		Completed	No Results Available	Spinal Cord Injuries|Pain	Drug: Amitriptyline		Eunice Kennedy Shriver National Institute of Child Health and Human Development (NICHD)	All	18 Years to 65 Years ¬† (Adult, Older Adult)	Phase 4	100	NIH	Interventional	Allocation: Randomized|Intervention Model: Single Group Assignment|Masking: Double|Primary Purpose: Treatment	NICHD-0120|P01HD033988	1996-08-01	2007-05-01	2007-05-01	2000-11-02		2012-12-18	University of Washington, Department of Rehabilitation Medicine, Seattle, Washington, United States		https://ClinicalTrials.gov/show/NCT00006428
NCT00006448	Treatment of Chronic Pain After Spinal Cord Injury (SCI) or Amputation		Completed	No Results Available	Spinal Cord Injuries|Amputation, Traumatic|Pain	Behavioral: cognitive therapy|Procedure: Physical Therapy|Drug: Methadone		Eunice Kennedy Shriver National Institute of Child Health and Human Development (NICHD)	All	18 Years to 75 Years ¬† (Adult, Older Adult)	Not Applicable	400	NIH	Interventional	Allocation: Randomized|Intervention Model: Single Group Assignment|Masking: Double|Primary Purpose: Treatment	NICHD-0108|5P01HD033989-05	1996-08-01	2001-07-01		2000-11-06		2016-09-26	University of Pittsburg Medical Center, Pittsburgh, Pennsylvania, United States		https://ClinicalTrials.gov/show/NCT00006448
NCT00011544	Physical Performance Measures for Manual Wheelchair Users		Completed	No Results Available	Spinal Cord Injury	Procedure: Performance Measure		US Department of Veterans Affairs|VA Office of Research and Development	All	20 Years to 79 Years ¬† (Adult, Older Adult)	Phase 2	120	U.S. Fed	Interventional	Allocation: Randomized|Intervention Model: Single Group Assignment|Masking: None (Open Label)	B1751R	1998-01-01		2000-12-01	2001-02-26		2009-01-21	VAMC, Baltimore, Baltimore, Maryland, United States		https://ClinicalTrials.gov/show/NCT00011544
NCT00011557	Functional Magnetic Micturition in Patients w/SCI		Completed	No Results Available	Spinal Cord Injury	Device: Assistance in Voiding		US Department of Veterans Affairs|VA Office of Research and Development	All	18 Years and older ¬† (Adult, Older Adult)	Phase 2	36	U.S. Fed	Interventional	Allocation: Randomized|Intervention Model: Single Group Assignment|Masking: None (Open Label)|Primary Purpose: Treatment	B1747R	1998-01-01		2000-12-01	2001-02-26		2009-01-21	VAMC, Long Beach, Long Beach, California, United States		https://ClinicalTrials.gov/show/NCT00011557
NCT00011570	Electrical Control of Bladder in Spinal Cord Injury Patients		Completed	No Results Available	Spinal Cord Injury	Device: Bladder & Bowel Control		US Department of Veterans Affairs|VA Office of Research and Development	All	18 Years and older ¬† (Adult, Older Adult)	Phase 2	18	U.S. Fed	Interventional	Allocation: Randomized|Intervention Model: Single Group Assignment|Masking: None (Open Label)|Primary Purpose: Treatment	B1770R	1998-04-01	2005-10-01	2007-11-01	2001-02-26		2008-04-28	VA Medical Center, Cleveland, Cleveland, Ohio, United States		https://ClinicalTrials.gov/show/NCT00011570
NCT00060983	Improving Gait in Patients With Spinal Cord Injuries		Completed	No Results Available	Spinal Cord Injuries	Procedure: Body weight supported locomotor training|Procedure: Functional electrical stimulation		Eunice Kennedy Shriver National Institute of Child Health and Human Development (NICHD)	All	18 Years to 60 Years ¬† (Adult)	Phase 2	36	NIH	Interventional	Allocation: Randomized|Intervention Model: Parallel Assignment|Masking: Single|Primary Purpose: Treatment	5K01HD001193-02	1998-05-01		2002-04-01	2003-05-19		2005-06-24	Miami Project, Bantle Center, Miami, Florida, United States		https://ClinicalTrials.gov/show/NCT00060983
NCT00006429	Treadmill Training for Spinal Cord Injury		Completed	No Results Available	Spinal Cord Injury	Procedure: body weight-supported treadmill training		Eunice Kennedy Shriver National Institute of Child Health and Human Development (NICHD)	All	16 Years to 65 Years ¬† (Child, Adult, Older Adult)	Phase 2	200	NIH	Interventional	Allocation: Randomized|Intervention Model: Single Group Assignment|Masking: Single	NICHD-0103|U01HD037439	1999-03-01	2004-02-01	2004-02-01	2000-11-02		2016-09-26	Rancho Los Amigos Medical Center, Downey, California, United States|Shepherd Center, Atlanta, Georgia, United States|Ohio State University, Columbus, Ohio, United States|Six Franklin Plaza, Philadelphia, Pennsylvania, United States|Thomas Jefferson University Hospital, Philadelphia, Pennsylvania, United States|University of Ottawa, Ottawa, Ontario, Canada|McGill University, Montreal, Quebec, Cana…		https://ClinicalTrials.gov/show/NCT00006429
NCT00150683	Effectiveness of Vibration and Standing Versus Standing Alone for the Treatment of Osteoporosis for People With Spinal Cord Injury.		Completed	No Results Available	Spinal Cord Injury.|Osteoporosis.	Device: vibration and passive standing versus passive standing alone	Change in bone mineral density from baseline of the hip, distal femur and proximal tibia at 6-months and 12-months.|Spasticity (modified Ashworth).|Quality of life.|Frequency and severity of adverse events.	Toronto Rehabilitation Institute|Ontario Neurotrauma Foundation	All	16 Years to 80 Years ¬† (Child, Adult, Older Adult)	Not Applicable	60	Other	Interventional	Allocation: Randomized|Intervention Model: Parallel Assignment|Masking: None (Open Label)|Primary Purpose: Treatment	ONBO-99135|Ontario Neurotrauma Foundation	1999-03-01		2001-07-01	2005-09-08		2005-09-08	Toronto Rehab, Lyndhurst Centre, Toronto, Ontario, Canada		https://ClinicalTrials.gov/show/NCT00150683
NCT00013338	Supported Treadmill Ambulation Training After Spinal Cord Injury		Completed	No Results Available	Spinal Cord Injury	Procedure: Ambulation Training		US Department of Veterans Affairs|VA Office of Research and Development	All	18 Years and older ¬† (Adult, Older Adult)	Phase 2	40	U.S. Fed	Interventional	Allocation: Randomized|Intervention Model: Single Group Assignment|Masking: None (Open Label)	B2142R	2000-01-01		2002-12-01	2001-03-16		2009-01-21	VAMC, Houston, Houston, Texas, United States		https://ClinicalTrials.gov/show/NCT00013338
NCT00150696	Risedronate for the Prevention of Osteoporosis in People With Spinal Cord Injury.		Completed	No Results Available	Acute Spinal Cord Injury.	Drug: Risedronate	Change in bone mineral density of the distal femur and proximal tibia between baseline, 12-months and 24-months.|Change in bone mineral density of the total body, spine and femoral neck between baseline, 12-months and 24-months.|Change in biochemical markers of bone turnover between baseline, 12-months and 24-months.|Frequency and severity of adverse events.|Quality of life.	Toronto Rehabilitation Institute|Ontario Neurotrauma Foundation|St. Joseph's Healthcare Foundation|Queen Elizabeth Hospital NHS Foundation Trust	All	16 Years to 60 Years ¬† (Child, Adult)	Phase 3	38	Other	Interventional	Allocation: Randomized|Intervention Model: Parallel Assignment|Masking: Double|Primary Purpose: Prevention	TRI REB #02-040|ONRO-79	2000-02-01		2005-11-01	2005-09-08		2007-11-21	Hamilton Health Sciences, Chedoke Site, Hamilton, Ontario, Canada|Toronto Rehab, Lyndhurst Centre, Toronto, Ontario, Canada		https://ClinicalTrials.gov/show/NCT00150696
NCT04034108	Early Surgical Intervention Combined With Weight-supported Walking Training		Completed	No Results Available	Spinal Cord Injuries	Procedure: Surgical intervention combined with weight-supported ambulation training	Change of Kunming Locomotor Scale (KLS)|Change of American Spinal Injury Association Impairment Scale (AIS)|Magnetic Resonance Imaging	Kunming Tongren Hospital	All	4 Years to 76 Years ¬† (Child, Adult, Older Adult)	Not Applicable	339	Industry	Interventional	Allocation: N/A|Intervention Model: Single Group Assignment|Masking: None (Open Label)|Primary Purpose: Treatment	KunmingTH_HZ_002	2000-05-01	2013-05-01	2013-05-01	2019-07-26		2019-07-26	Kunming General Hospital of Chengdu Military Command, Kunming, Yunnan, China|Kunming Tongren Hospital, Kunming, Yunnan, China		https://ClinicalTrials.gov/show/NCT04034108
NCT00011609	Clinical Evaluation of a Wheelchair Mounted Robotic Arm		Completed	No Results Available	Spinal Cord Injury	Device: Robotic Arm		US Department of Veterans Affairs|VA Office of Research and Development	All	18 Years and older ¬† (Adult, Older Adult)	Phase 2	30	U.S. Fed	Interventional	Allocation: Randomized|Intervention Model: Single Group Assignment|Masking: None (Open Label)|Primary Purpose: Treatment	B2311T	2000-08-01		2001-11-01	2001-02-26		2009-01-21	VAMC, Houston, Houston, Texas, United States		https://ClinicalTrials.gov/show/NCT00011609
NCT00223860	Provocative Testing Using LHRH and hCG of the Pituitary-Gonadal Axis in Persons With Spinal Cord Injury.		Completed	No Results Available	Hypogonadism|Spinal Cord Injury	Drug: Human chorionic gonadotropin (hCG)|Drug: Luteinizing hormone releasing hormone (LHRH)		US Department of Veterans Affairs|VA Office of Research and Development	Male	18 Years to 65 Years ¬† (Adult, Older Adult)	Not Applicable	100	U.S. Fed	Interventional	Allocation: Non-Randomized|Intervention Model: Single Group Assignment|Masking: None (Open Label)|Primary Purpose: Diagnostic	B2648	2001-07-01	2007-12-01	2007-12-01	2005-09-22		2008-03-11	VA Medical Center, Bronx, Bronx, New York, United States		https://ClinicalTrials.gov/show/NCT00223860
NCT00193869	SuperDEX Trial (Comparison of Two Doses of Dexamethasone for Malignant Spinal Cord Compression Treated by Radiotherapy).		Completed	No Results Available	Spinal Cord Compression From Neoplasm Metastasis	Drug: Dexamethasone	Satisfactory recruitment|Acceptable steroid toxicity rate at 28 days with reference to baseline.|Ambulation rates at 1 month|Barthel Index|Functional Independence (FIM)|Functional Improvement Score (FIS)within 2 weeks with reference to baseline|Pain	Trans Tasman Radiation Oncology Group|Cancer Council New South Wales	All	17 Years and older ¬† (Child, Adult, Older Adult)	Phase 2	20	Other	Interventional	Allocation: Randomized|Intervention Model: Parallel Assignment|Masking: None (Open Label)|Primary Purpose: Treatment	TROG 01.05	2001-09-01		2003-12-01	2005-09-19		2007-05-10	St George Hospital, Kogarah, New South Wales, Australia		https://ClinicalTrials.gov/show/NCT00193869
NCT00047580	Comparison of Safety and Efficacy of Tizanidine Hydrochloride Capsules Versus Zanaflex¬Æ (Tizanidine Hydrochloride Tablets) Taken While in the Fed State (Just After a Meal) and in the Fasted State (Before a Meal) in Patients With Moderate to Severe Spasticity.		Completed	No Results Available	Multiple Sclerosis|Muscle Spasticity|Spinal Cord Injury|Stroke	Drug: tizanidine hydrochloride capsule		Elan Pharmaceuticals	All	18 Years and older ¬† (Adult, Older Adult)	Phase 3	120	Industry	Interventional	Allocation: Randomized|Masking: None (Open Label)|Primary Purpose: Treatment	ELN021-502	2002-06-01		2002-09-01	2002-10-10		2015-12-14	Radiant Research, Tucson, Arizona, United States|The Neurology Center, Encinitas, California, United States|Northridge Neurological Center, Northridge, California, United States|The Neurology Center, Oceanside, California, United States|Neurology Medical Group of Diablo Valley, Walnut Creek, California, United States|Colorado Neurology Movement Disorders Center, Englewood, Colorado, United States…		https://ClinicalTrials.gov/show/NCT00047580
NCT00141375	To Evaluate Long-Term Safety and Efficacy of Pregabalin in the Treatment of Neuropathic Pain After Spinal Cord Injury.		Completed	No Results Available	Neuropathic Pain	Drug: Pregabalin	Safety and Efficacy	Pfizer	All	18 Years and older ¬† (Adult, Older Adult)	Phase 3	132	Industry	Interventional	Allocation: Non-Randomized|Intervention Model: Single Group Assignment|Masking: None (Open Label)|Primary Purpose: Treatment	1008-000-202	2002-08-01		2006-01-01	2005-09-01		2008-01-15	Pfizer Investigational Site, Little Bay, New South Wales, Australia|Pfizer Investigational Site, St. Leonards, New South Wales, Australia|Pfizer Investigational Site, Warrawong, New South Wales, Australia|Pfizer Investigational Site, Woolloongabba, Queensland, Australia|Pfizer Investigational Site, Heidelberg, Victoria, Australia|Pfizer Investigational Site, Shenton Park, Western Australia, Austr…		https://ClinicalTrials.gov/show/NCT00141375
NCT00148239	Health Interventions for Survivors and Primary Support Persons of Spinal Cord Injury	SCI	Completed	No Results Available	Spinal Cord Injuries	Behavioral: Caregiver Only Intervention|Behavioral: Dual Treatment|Behavioral: Control	Depressive symptoms caregivers and SCI|Caregiver Burden|Social support caregiver and SCI|Health symptoms caregiver and SCI	University of Pittsburgh|University of Miami	All	30 Years and older ¬† (Adult, Older Adult)	Phase 2|Phase 3	380	Other	Interventional	Allocation: Randomized|Intervention Model: Parallel Assignment|Masking: Double (Investigator, Outcomes Assessor)|Primary Purpose: Treatment	5R01NR008272	2002-09-01	2007-07-01	2008-07-01	2005-09-07		2015-12-02	University of Miami, Miami, Florida, United States|University of Pittsburgh (UCSUR), Pittsburgh, Pennsylvania, United States		https://ClinicalTrials.gov/show/NCT00148239
NCT00154505	Effects of Lateral Trunk Support on Spinal Alignment in Spinal Cord Injured Persons		Completed	No Results Available	Scoliosis|Spinal Cord Injury	Device: Lateral trunk support of wheelchair seating	Spinal aligamnet(Cobb angle)	National Taiwan University Hospital|National Science Council, Taiwan	All	18 Years to 60 Years ¬† (Adult)	Phase 1	20	Other	Interventional	Allocation: Non-Randomized|Intervention Model: Single Group Assignment|Masking: None (Open Label)|Primary Purpose: Treatment	9261701245|NSC 91-2314-B-002-393|NSC 92-2314-B-002-084	2002-09-01		2004-11-01	2005-09-12		2005-09-12	School of Occupational Therapy, National Taiwan University, Taipei, Taiwan		https://ClinicalTrials.gov/show/NCT00154505
NCT00654082	A Study Evaluating the Efficacy and Safety of Sildenafil in Men With Traumatic Spinal Cord Injury and Erectile Dysfunction		Completed	No Results Available	Spinal Cord Injury|Erectile Dysfunction|Spinal Cord Trauma|Injuries, Spinal Cord|Impotence	Drug: sildenafil|Drug: placebo	The proportion of subjects who indicated a preference for either treatment and who said that the treatment improved their erections|Responses to the International Index of Erectile Function (IIEF)|Responses to the Global Efficacy Assessment (GEA) Question|Responses to questions on the Quality of Life (QoL) Questionnaire|Responses to Erectile Dysfunction Inventory of Treatment Satisfaction (EDITS)…	Pfizer's Upjohn has merged with Mylan to form Viatris Inc.|Pfizer	Male	19 Years and older ¬† (Adult, Older Adult)	Phase 4	88	Industry	Interventional	Allocation: Randomized|Intervention Model: Crossover Assignment|Masking: Double (Participant, Investigator)|Primary Purpose: Treatment	A1481103	2002-09-01		2003-08-01	2008-04-07		2021-02-01	Pfizer Investigational Site, Bahcelievler, Istanbul, Turkey|Pfizer Investigational Site, Balcova, Izmir, Turkey|Pfizer Investigational Site, Ankara, Turkey|Pfizer Investigational Site, Bursa, Turkey|Pfizer Investigational Site, Konya, Turkey		https://ClinicalTrials.gov/show/NCT00654082
NCT00654680	Evaluating the Efficacy and Safety of Vardenafil in Patients Erectile Dysfunction Solely Secondary to Spinal Cord Injury		Completed	No Results Available	Erectile Dysfunction	Drug: Vardenafil (Levitra, BAY38-9456)|Drug: Placebo	International Index of Erectile Function-Erectile Function domain|Sexual Encounter Profile Question 2|Sexual Encounter Profile Question 3|Other diary based variables|Safety and tolerability	Bayer|GlaxoSmithKline	Male	18 Years and older ¬† (Adult, Older Adult)	Phase 3	418	Industry	Interventional	Allocation: Randomized|Intervention Model: Parallel Assignment|Masking: Double (Participant, Investigator)|Primary Purpose: Treatment	10473	2002-10-01	2004-01-01	2004-01-01	2008-04-09		2013-09-30			https://ClinicalTrials.gov/show/NCT00654680
NCT00223873	The Use of Penile Vibratory Stimulation to Decrease Spasticity Following Spinal Cord Injury		Completed	No Results Available	Spinal Cord Injury|Muscle Spasticity	Procedure: Penile Vibratory Stimulation	Spasticity in the lower extremities will be scored per the|Ashworth scale at each weekly visit. Additionally,|subjects will record their daily spasm frequency on a 5|point scale in the form of a daily questionnaire. Intra|and inter-visit indicies of spas.|Several questionnaires such as the CHART, SWLS, FIM, and IIEF are used to assess changes in quality of life and function.	US Department of Veterans Affairs|VA Office of Research and Development	Male	18 Years to 70 Years ¬† (Adult, Older Adult)	Not Applicable	30	U.S. Fed	Interventional	Allocation: Randomized|Intervention Model: Single Group Assignment|Masking: None (Open Label)|Primary Purpose: Treatment	7927-09	2002-11-01		2006-07-01	2005-09-22		2009-01-21	Miami Veterans Affairs Medical Center, Miami, Florida, United States		https://ClinicalTrials.gov/show/NCT00223873
NCT00055588	Nervous System Function in Normal Volunteers During Cycling Training		Completed	No Results Available	Healthy	Procedure: Locomotor training		National Institute of Neurological Disorders and Stroke (NINDS)|National Institutes of Health Clinical Center (CC)	All	18 Years and older ¬† (Adult, Older Adult)	Phase 1	60	NIH	Interventional	Primary Purpose: Treatment	030120|03-N-0120	2003-03-04		2008-05-20	2003-03-06		2017-07-02	National Institutes of Health Clinical Center, 9000 Rockville Pike, Bethesda, Maryland, United States		https://ClinicalTrials.gov/show/NCT00055588
NCT00871455	Effect of Low-Dose Baclofen Administration on the GH-IGF1 Axis Study		Completed	No Results Available	Spinal Cord Injury	Drug: Baclofen	Determine the threshold dose 20 or 40 mg/d of baclofen and the dose-response curve of the medication for its effect to raise plasma IGF-1 levels|Assessment of the adverse side effects, if any, of low dose baclofen therapy	US Department of Veterans Affairs|Kessler Foundation|VA Office of Research and Development	All	20 Years to 70 Years ¬† (Adult, Older Adult)	Not Applicable	20	U.S. Fed|Other	Interventional	Allocation: Non-Randomized|Intervention Model: Single Group Assignment|Masking: None (Open Label)|Primary Purpose: Treatment	B4162C-7	2003-04-01	2007-12-01	2011-12-01	2009-03-30		2012-04-02	VA Medical Center, Bronx, Bronx, New York, United States		https://ClinicalTrials.gov/show/NCT00871455
NCT00223912	Effect of Exercise on Blood Coagulation in Persons With Chronic Spinal Cord Injury	FES	Completed	No Results Available	Cardiovascular Disease|Spinal Cord Injury	Device: ERGYS BikeFunctional Electrical Stimulation Ergometry	FES cycle ergometry was performed for 8 sessions. Before and after exercise blood samples were collected and platelet aggregation and blood coagulation analysis were performed.	US Department of Veterans Affairs|VA Office of Research and Development	All	18 Years to 65 Years ¬† (Adult, Older Adult)	Not Applicable	12	U.S. Fed	Interventional	Allocation: Non-Randomized|Intervention Model: Single Group Assignment|Masking: None (Open Label)|Primary Purpose: Prevention	B3168P|1124-03-0010|MIRB#_00514	2003-11-01	2006-12-01	2006-12-01	2005-09-22		2010-09-16	VA Medical Center, Bronx, Bronx, New York, United States		https://ClinicalTrials.gov/show/NCT00223912
NCT00458471	E. Coli for Prevention of Catheter UTI in SCI Patients		Completed	No Results Available	Urinary Tract Infection(UTI)	Device: Insertion of a urinary catheter coated with benign E. coli	bladder colonization and rate of urinary tract infection	Eunice Kennedy Shriver National Institute of Child Health and Human Development (NICHD)	All	18 Years to 64 Years ¬† (Adult)	Phase 1	12	NIH	Interventional	Allocation: Non-Randomized|Primary Purpose: Prevention	H-11717	2003-11-01		2005-07-01	2007-04-10		2007-04-10	Michael E. DeBakey Veterans Affairs Medical Center, Houston, Texas, United States		https://ClinicalTrials.gov/show/NCT00458471
NCT01095380	Comparison of Post-pinal Cord Injury (SCI) Locomotor Training Techniques		Completed	No Results Available	Spinal Cord Injury	Other: Locomotor training	Walking speed|Functional walking capacity	University of Miami|Eunice Kennedy Shriver National Institute of Child Health and Human Development (NICHD)	All	16 Years to 65 Years ¬† (Child, Adult, Older Adult)	Phase 2|Phase 3	74	Other|NIH	Interventional	Allocation: Randomized|Intervention Model: Parallel Assignment|Masking: Single (Outcomes Assessor)|Primary Purpose: Treatment	R01HD041487	2003-11-01	2008-11-01	2008-11-01	2010-03-30		2010-03-30			https://ClinicalTrials.gov/show/NCT01095380
NCT00286520	Treatment of Fecal Incontinence and Constipation in Patients With Spinal Cord Injury		Completed	No Results Available	Constipation|Fecal Incontinence|Spinal Cord Injury	Procedure: Transanal irrigation with Peristeen Anal Irrigation	Cleveland Clinic Constipaton Scoring System|St. Mark's Fecal Incontinence Grading System|Neurogenic Bowel Dysfunction Score|American Society of Colorectal Surgeon Fecal Incontinence Score	University of Aarhus|Coloplast A/S|Montecatone Rehabilitation Institute S.p.A.|National Spinal Injuries Centre, Stoke Mandeville Hospital, United Kingdom,|Orthop√§dische Universit√§tsklinik Heidelberg, Germany,|Karolinska University Hospital|Central Jutland Regional Hospital	All	18 Years and older ¬† (Adult, Older Adult)	Phase 4	80	Other|Industry	Interventional	Allocation: Randomized|Intervention Model: Parallel Assignment|Masking: None (Open Label)|Primary Purpose: Treatment	DK021CC	2003-12-01		2005-08-01	2006-02-03		2006-02-03	Surgical Research Unit, Department of Surgery P, Aarhus University Hospital, Aarhus, Denmark		https://ClinicalTrials.gov/show/NCT00286520
NCT00223769	The Use of Anabolic Steroids to Improve Function After Spinal Cord Injury		Completed	No Results Available	Spinal Cord Injury	Drug: Oxandrolone	Part-A: lean body mass, upper extremity muscle strength. Measures are made at baseline, 12-weeks (end of intervention), and at 24-weeks.|Part-B: respiratory function, efficency of ambulaton (speed and quality of gait). Measures are made at baseline,|12-weeks (end of intervention), and at 24-weeks.|Part-A: maximum VO2/respiratory function, functional status, safety, quality of life, community|re-i…	US Department of Veterans Affairs|VA Office of Research and Development	All	20 Years to 70 Years ¬† (Adult, Older Adult)	Not Applicable	40	U.S. Fed	Interventional	Allocation: Randomized|Intervention Model: Single Group Assignment|Masking: Double|Primary Purpose: Treatment	B2656C	2004-01-01		2006-05-01	2005-09-22		2008-02-13	Miami Veterans Affairs Medical Center, Miami, Florida, United States		https://ClinicalTrials.gov/show/NCT00223769
NCT00309114	Prevention of Urinary Tract Infection (UTI) in Persons With Spinal Cord Injury (SCI)		Completed	No Results Available	Urinary Tract Infections	Procedure: bacterial interference	Putting E. coli 83972 into the bladder of SCI patients reduces the rate of symptomatic UTI.|Study the affect of bladder colonization with E. coli 83972 on the rate of symptom causing UTI in a large group of SCI and Spina Bifida patients.	Baylor College of Medicine	All	15 Years to 64 Years ¬† (Child, Adult)	Not Applicable	65	Other	Interventional	Allocation: Randomized|Intervention Model: Parallel Assignment|Masking: Triple (Participant, Care Provider, Investigator)|Primary Purpose: Prevention	5R01HD043943-03|H-8393	2004-02-01	2009-11-01	2009-11-01	2006-03-31		2017-02-23	Shepherd Center, Atlanta, Georgia, United States|Rehab Institute Chicago, Chicago, Illinois, United States|UT Southwestern, Dallas, Texas, United States|Michael E Debakey VA Medical Center, Houston, Texas, United States|The Institute for Rehabilitation and Research (TIRR), Houston, Texas, United States		https://ClinicalTrials.gov/show/NCT00309114
NCT02259751	Study to Determine Pharmacodynamic Effects and Pharmacokinetics of KUC 7483 CL in Patients With Spinal Cord Injury and Neurogenic Detrusor Overactivity		Completed	No Results Available	Spinal Cord Injuries	Drug: KUC 7483 CL|Drug: Placebo	Change from baseline in "volume at first contraction"|Change from baseline in Detrusor pressure at first contraction|Change from baseline in Maximum amplitude of involuntary detrusor contraction|Change from baseline in Volume at first incontinence episode|Change from baseline in compliance|Change from baseline in Maximum cystometric capacity|Change from baseline in Detrusor pressure at maximum fl…	Boehringer Ingelheim	Male	18 Years to 70 Years ¬† (Adult, Older Adult)	Phase 1	26	Industry	Interventional	Allocation: Randomized|Intervention Model: Parallel Assignment|Masking: Double|Primary Purpose: Treatment	1207.4	2004-02-01	2005-02-01		2014-10-09		2014-10-09			https://ClinicalTrials.gov/show/NCT02259751
NCT00108043	Orthostatic Tolerance During FES (Functional Electrical Stimulation)-Walking in Paraplegia		Completed	No Results Available	Spinal Cord Injury	Procedure: FES-evoked functional upright gait	Change of systolic blood pressure during three FES-evoked stepping conditions|Cardiovascular and Metabolic Responses|Autonomic Responses|Muscle Metabolic Responses|Humoral Responses|Syncope Symptom Score	University of Sydney	Male	18 Years to 55 Years ¬† (Adult)	Phase 1	10	Other	Interventional	Allocation: Non-Randomized|Intervention Model: Single Group Assignment|Masking: None (Open Label)|Primary Purpose: Treatment	NHMRC 302013	2004-03-01		2006-12-01	2005-04-13		2015-12-03	Rehabilitation Research Centre, University of Sydney, Sydney, New South Wales, Australia		https://ClinicalTrials.gov/show/NCT00108043
NCT00245726	Functional Electrical Stimulation (FES) Cycling for Children With Spinal Cord Injuries (SCI)		Completed	No Results Available	Spinal Cord Injury	Device: FES Cycle|Device: ES therapy|Device: Passive (Motor Assist) Cycle	Muscle Cross Sectional Area|ES Muscle Strength|Bone Mineral Density of Hip and Knee|Cholesterol|White Blood Cell Count|Peak Resistive Force|Ashworth Scale|Spasm Scale|Quality of Life (PedsQL)|ASIA assessment	Shriners Hospitals for Children	All	5 Years to 15 Years ¬† (Child)	Not Applicable	30	Other	Interventional	Allocation: Randomized|Intervention Model: Parallel Assignment|Masking: None (Open Label)|Primary Purpose: Treatment	SHC-8540	2004-03-01	2008-06-01	2008-06-01	2005-10-28		2009-02-02	Kennedy Krieger Institute, Baltimore, Maryland, United States|Shriners Hospitals for Children, Philadelphia, Pennsylvania, United States		https://ClinicalTrials.gov/show/NCT00245726
NCT00461474	Study of Strengthening Exercises and Improving Movement for Painful Shoulders in Adults With Spinal Cord Injury		Completed	No Results Available	Shoulder Pain	Behavioral: Shoulder strengthening exercises|Behavioral: Movement Optimization	shoulder pain as measured by Wheelchair Users Shoulder Pain Index (WUSPI)|General shoulder pain measured by a visual analog scale (VAS)from the McGill Short Form Pain Questionnaire|Shoulder torque with a hand held dynamometer|Subject's activity level with the Physical Activity Scale for Individuals with Physical Disabilities (PASIPD)|Community involvement with the Community Activities Checklist (…	University of Southern California|Physical Therapy Clinical Research Network	All	19 Years to 75 Years ¬† (Adult, Older Adult)	Phase 1	80	Other	Interventional	Allocation: Randomized|Intervention Model: Parallel Assignment|Masking: Single|Primary Purpose: Treatment	HS-025022	2004-03-01		2006-03-01	2007-04-18		2007-04-19	Rancho Los Amigos National Rehabilitation Hospital, Downey, California, United States		https://ClinicalTrials.gov/show/NCT00461474
NCT00652262	BAY38-9456 - Supportive Trial for Spinal Injury		Completed	No Results Available	Erectile Dysfunction|Sexual Dysfunction|Spinal Cord Injury	Drug: Levitra (Vardenafil, BAY38-9456)	The Erectile Function (EF) domain score of IIEF calculated as the sum of scores from Questions 1 to 5 and 15|The Global Assessment Question|The IIEF EF domain score|IIEF domain scores other than the EF domain score[intercourse satisfaction (Q6 to Q8), overall satisfaction (Q13, Q14), orgasmic function (Q9, Q10), sexual desire (Q11, Q12)]|Scores of Questions 1 to 15 on the IIEF Questionnaire|Patie…	Bayer	Male	20 Years to 64 Years ¬† (Adult)	Phase 3	32	Industry	Interventional	Allocation: Non-Randomized|Intervention Model: Single Group Assignment|Masking: None (Open Label)|Primary Purpose: Treatment	100608	2004-03-01		2004-11-01	2008-04-03		2014-12-23	Nagoya, Aichi, Japan|Iizuka, Fukuoka, Japan|Beppu, Oita, Japan		https://ClinicalTrials.gov/show/NCT00652262
NCT00559494	Minocycline and Perfusion Pressure Augmentation in Acute Spinal Cord Injury		Completed	No Results Available	Spinal Cord Injuries	Drug: Minocycline|Drug: placebo|Procedure: SCPP augmentation|Procedure: SCPP control	Protocol compliance, feasibility and adverse events|American Spinal Injury Association - motor score (primary clinical outcome) and sensory scores|Short Form 36 - Quality of Life Assessment|Functional Independence Measure|London Handicap Scale|Spinal Cord Injury Measure|CSF collection (6/day) and biochemical assays|Sequential Anatomical MRI	University of Calgary|Paralyzed Veterans of America|American Association of Neurological Surgeons|Hotchkiss Brain Institute, University of Calgary	All	16 Years and older ¬† (Child, Adult, Older Adult)	Phase 1|Phase 2	52	Other	Interventional	Allocation: Randomized|Intervention Model: Parallel Assignment|Masking: Quadruple (Participant, Care Provider, Investigator, Outcomes Assessor)|Primary Purpose: Treatment	17007|PVA2414	2004-06-01	2010-08-01	2010-08-01	2007-11-16		2013-03-18	Foothills Medical Centre, Calgary, Alberta, Canada		https://ClinicalTrials.gov/show/NCT00559494
NCT00421083	Efficacy and Safety of Tadalafil in Subjects With Erectile Dysfunction Caused by Spinal Cord Injury		Completed	No Results Available	Erectile Dysfunction|Spinal Cord Injuries	Drug: tadalafil	Safe and effective as shown by improvement on erectile function IIEF scores and SEP scores.|Additional efficacy variables including GAQ, SEP, and IIEF subdomains. Quality of life.	Eli Lilly and Company|ICOS Corporation	Male	18 Years and older ¬† (Adult, Older Adult)	Phase 3	180	Industry	Interventional	Allocation: Randomized|Intervention Model: Parallel Assignment|Masking: Double|Primary Purpose: Treatment	9108|H6D-MC-LVFY	2004-09-01		2005-06-01	2007-01-11		2007-10-25	For additional information regarding investigative sites for this trial, contact 1-877-CTLILLY (1-877-285-4559, 1-317-615-4559) Mon - Fri from 9 AM to 5 PM Eastern Time (UTC/GMT - 5 hours, EST), or speak with your personal physician., Indianapolis, Indiana, United States		https://ClinicalTrials.gov/show/NCT00421083
NCT00093275	HP184 in Chronic Spinal Cord Injury Subjects		Completed	No Results Available	Spinal Cord Injury	Drug: HP184	Change from baseline in total motor score of American Spinal Injury Association (ASIA) manual motor test at Week 24.|Safety evaluation.	Sanofi	All	18 Years to 65 Years ¬† (Adult, Older Adult)	Phase 2	262	Industry	Interventional	Allocation: Randomized|Intervention Model: Parallel Assignment|Masking: Double|Primary Purpose: Treatment	DRI6213|HP184B/2002	2004-10-01	2005-12-01	2005-12-01	2004-10-07		2008-08-21	Sanofi-Aventis Administrative Office, Bridgewater, New Jersey, United States|sanofi-aventis administrative Australia & New-Zealand administrative office, Macquarie Park, New South Wales, Australia|Sanofi-Aventis Administrative Office, Berlin, Germany|Sanofi-Aventis Administrative Office, Mumbai, India|Sanofi-Aventis Administrative Office, Guildford Surrey, United Kingdom		https://ClinicalTrials.gov/show/NCT00093275
NCT00138866	Risedronate for the Treatment of Osteoporosis for People With Spinal Cord Injury		Completed	No Results Available	Osteoporosis	Drug: Risedronate	Change in bone mineral density of the distal femur between baseline and 18-months|Change in bone mineral density of the hips and proximal tibia between baseline and 18-months|The change in biochemical bone markers of bone turnover between baseline and 18-months|The frequency and severity of adverse events	Toronto Rehabilitation Institute|The Physicians' Services Incorporated Foundation|St. Joseph's Health Care London	All	18 Years to 70 Years ¬† (Adult, Older Adult)	Phase 3	46	Other	Interventional	Allocation: Randomized|Intervention Model: Parallel Assignment|Masking: Double (Participant, Investigator)|Primary Purpose: Treatment	TRI REB #04-016|PSI #03-52	2004-11-01	2009-01-01	2009-03-01	2005-08-30		2010-10-13	Toronto Rehab, Lyndhurst Centre, Toronto, Ontario, Canada		https://ClinicalTrials.gov/show/NCT00138866
NCT00175682	Prazosin Vibrostimulation Autonomic Dysreflexia and Spinal Cord Injury Study		Completed	No Results Available	Autonomic Dysreflexia	Drug: Prazosin HCL	The hypothesis will be tested by measuring three parameters during prazosin and non-prazosin trials in which ejaculation occurs.|Objective parameters: absolute beat-to-beat BP, differences between systolic and diastolic BP readings, heart rate variability, heart rate and ECG readings (looking for irregular rhythms) and visible signs of AD experienced by the subject|Subjective parameters: subject …	University of British Columbia	Male	18 Years to 55 Years ¬† (Adult)	Not Applicable	7	Other	Interventional	Allocation: Randomized|Intervention Model: Crossover Assignment|Masking: Double (Participant, Investigator)|Primary Purpose: Prevention	C04-0343	2004-12-01	2011-07-28	2011-07-28	2005-09-15		2017-03-03	Vancouver General Hospital, BC Centre for Sexual Medicine, Vancouver, British Columbia, Canada		https://ClinicalTrials.gov/show/NCT00175682
NCT00500812	A Safety Study for Cethrin (BA-210) in the Treatment of Acute Thoracic and Cervical Spinal Cord Injuries		Completed	No Results Available	Spinal Cord Injury	Drug: Cethrin	The primary goal of this study is to determine the safety and tolerability of Cethrin when administered in conjunction with fibrin sealant to the dura mater of the spinal cord.|Efficacy by AIS	Vertex Pharmaceuticals Incorporated	All	16 Years to 70 Years ¬† (Child, Adult, Older Adult)	Phase 1|Phase 2	48	Industry	Interventional	Allocation: Non-Randomized|Intervention Model: Single Group Assignment|Masking: None (Open Label)|Primary Purpose: Treatment	BA-210-101	2005-02-01	2008-12-01	2009-02-01	2007-07-13		2016-04-14	St. Joseph's Hospital & Medical Center, Phoenix, Arizona, United States|University of Cincinnati Mayfield Clinic and Spine Institute, Cincinnati, Ohio, United States|Thomas Jefferson University Hospital, Philadelphia, Pennsylvania, United States|Univ.of Virginia Health System, Charlottesville, Virginia, United States|University of Washington Harborview Medical Center, Seattle, Washington, United …		https://ClinicalTrials.gov/show/NCT00500812
NCT00816803	Cell Transplant in Spinal Cord Injury Patients		Completed	No Results Available	Chronic Spinal Cord Injury	Procedure: Autologous bone marrow transplant|Procedure: Physical therapy	Safety of autologous BM transplant measured by absence of neuronal changes, infections or increased intracranial tension, and monitoring for any abnormal growth or tumor formation by MRI.|Efficacy of BM cell transplant in improving neurological functions in patients with chronic SCI. Improvement in motor, sensory and sphincteric functions, and quality of life using ASIA scores and MRI.	Cairo University|Al-Azhar University|Medical Military Academy, Egypt|Alexandria University	All	10 Years to 36 Years ¬† (Child, Adult)	Phase 1|Phase 2	80	Other	Interventional	Intervention Model: Parallel Assignment|Masking: Single (Outcomes Assessor)|Primary Purpose: Treatment	EGY-SCI-1	2005-05-01	2008-12-01	2008-12-01	2009-01-05		2009-01-05	Cairo University School of Medicine, Cairo, Egypt		https://ClinicalTrials.gov/show/NCT00816803
NCT00167856	Effects of Venlafaxine on Chronic Neuropathic Pain Following Spinal Cord Injury		Completed	No Results Available	Neuropathic Pain|Pain|Spinal Cord Injuries	Drug: Venalafaxine hydrochloride	Pain Intensity as measured by subject pain diaries	US Department of Veterans Affairs|VA Office of Research and Development	All	18 Years to 70 Years ¬† (Adult, Older Adult)	Not Applicable	16	U.S. Fed	Interventional	Allocation: Randomized|Intervention Model: Crossover Assignment|Masking: Triple (Participant, Care Provider, Investigator)|Primary Purpose: Treatment	B3070-R	2005-06-01	2007-08-01	2008-08-01	2005-09-14		2014-03-27	VA Medical Center, Miami, Miami, Florida, United States		https://ClinicalTrials.gov/show/NCT00167856
NCT00221767	Medico-economical Impact of the Brindley Neurosurgical Technique in France	BRINDLEY	Completed	No Results Available	Spinal Cord Injuries|Neurogenic Bladder Disorder|Paraplegia|Quadriplegia	Device: Brindley technique (bladder system)	Proportion of patients showing a complete voluntary (including electrostimulation) micturition|Bladder capacity (cystometry)|costs|incidence of urinary infections|incontinence|autonomic hyperreflexia (AHR)|defecation|quality of life|lower limbs spasticity	University Hospital, Bordeaux|Ministry of Health, France	All	18 Years and older ¬† (Adult, Older Adult)	Not Applicable	53	Other	Interventional	Allocation: Non-Randomized|Intervention Model: Parallel Assignment|Masking: None (Open Label)|Primary Purpose: Prevention	9415-04|2004-001	2005-06-01	2010-03-01	2010-03-01	2005-09-22		2012-06-14	Neurochirurgie A - H√¥pital Pellegrin , Place Am√©lie Raba-L√©on, Bordeaux Cedex, France		https://ClinicalTrials.gov/show/NCT00221767
NCT00667966	Assess Efficacy in Subjects With Traumatic Spinal Cord Injury	LEMDE	Completed	No Results Available	Erectile Dysfunction|Spinal Cord Injury	Drug: Vardenafil (Levitra, BAY 38-9456), 10 mg|Drug: Placebo|Drug: Vardenafil (Levitra, BAY 38-9456), 20 mg	Characteristics of responders and non responder with respect to the electrophysiological (skin sympathetic response, bulbocavernosus reflex and somatosensory and pudendal evoked potential), urodynamical and clinical (ASIA group) tests|Duration of an erection ‚â• 60% in the base induced by an erectogenic stimulus (vibrator and/or manual) in each subject after administering a 10 mg dose of vardenaf…	Bayer	Male	18 Years to 64 Years ¬† (Adult)	Phase 4	45	Industry	Interventional	Allocation: Randomized|Intervention Model: Crossover Assignment|Masking: Double (Participant, Investigator)|Primary Purpose: Treatment	11861|2004-005282-37	2005-07-01		2007-02-01	2008-04-28		2015-05-06	Badalona, Barcelona, Spain|Toledo, Spain		https://ClinicalTrials.gov/show/NCT00667966
NCT00252954	Levetiracetam in Chronic Neuropathic Pain Following Spinal Cord Injury		Completed	No Results Available	Injuries, Spinal Cord|Pain	Drug: Levetiracetam	Change in median pain intensity (measured daily on a 10 point NRS) of spontaneous pain from baseline week to last week of treatment.|Spasms and spasticity; pain relief for total, at- and below-level pain; evoked pain; escape medication; NPSI; predictive value of the presence of evoked pain; Global impression of change; sleep disturbance.	Danish Pain Research Center|UCB Nordic A/S	All	18 Years and older ¬† (Adult, Older Adult)	Phase 4	36	Other|Industry	Interventional	Allocation: Randomized|Intervention Model: Crossover Assignment|Masking: Double (Participant, Investigator)|Primary Purpose: Treatment	LEV-2005	2005-11-01	2008-03-01	2008-12-01	2005-11-15		2009-08-20	Danish Pain Research Center, Aarhus University Hospital, Aarhus, Denmark|Clinic for Spinal Cord Injuries, Rigshospitalet, Hornbaek, Denmark|The Spinal Cord Unit, Dept of Rheumatology, Viborg, Denmark		https://ClinicalTrials.gov/show/NCT00252954
NCT00458354	Use of Spinal Sealant System During Spinal Surgery		Completed	No Results Available	Spine Surgery|Excessive Repair|Spinal Cord Injuries|Complication of Surgical Procedure	Device: Spinal Sealant|Procedure: Standard Methods of Closing of the Dura	Percent (%) success obtaining watertight closure following assigned treatment (Spinal Sealant or control)	M.D. Anderson Cancer Center|Confluent Surgical	All	18 Years to 75 Years ¬† (Adult, Older Adult)	Phase 3	3	Other|Industry	Interventional	Allocation: Randomized|Intervention Model: Parallel Assignment|Masking: Single (Participant)|Primary Purpose: Treatment	2005-0641	2006-01-01	2007-11-01	2008-12-01	2007-04-10		2011-10-12	UT MD Anderson Cancer Center, Houston, Texas, United States		https://ClinicalTrials.gov/show/NCT00458354
NCT00968643	Spinal Cord Compression. ICORG 05-03, V6		Completed	No Results Available	Spinal Cord Compression|Unspecified Adult Solid Tumor, Protocol Specific	Radiation: radiation therapy	Mobility status: measured by the change in mobility status between baseline and 5 weeks, as measured by the in-house mobility scale|Quality of life as assessed by the EORTC QLQ-C30 version 3 quality-of-life questionnaire|Toxicity: assessed at first follow-up, evaluated as per standard RTOG acute and long-term toxicity scale|Pain control: assessed using a Visual Analogue Scale|Overall survival: th…	Cancer Trials Ireland	All	18 Years and older ¬† (Adult, Older Adult)	Phase 3	126	Other	Interventional	Allocation: Randomized|Intervention Model: Parallel Assignment|Masking: None (Open Label)|Primary Purpose: Treatment	05-03 ICORG|ICORG-05-03|EU-20952	2006-01-01	2014-05-01		2009-08-31		2014-12-31	Cork University Hospital, Cork, Ireland|Saint Luke's Radiation Oncology Network (SLRON), Dublin, Ireland|Galway University Hospital, Galway, Ireland|Whitfield Cancer Centre at Whitfield Clinic, Waterford, Ireland		https://ClinicalTrials.gov/show/NCT00968643
NCT00406016	Acute Safety, Tolerability, Feasibility and Pharmacokinetics of Intrath. Administered ATI355 in Patients With Acute SCI		Completed	No Results Available	Acute Spinal Cord Injury	Drug: ATI355	Feasibility, Safety and Tolerability of a continuous intrathecal (i.t.) infusion or i.t. repeated bolus injections of ATI355 in patients with acute spinal cord injury at every visit and Assessment of serum and CSF pharmacokinetics at predefined visits.|Immunogenicity of ATI355 in acute spinal cord injury patients up to one year.|Early potential signal of efficacy by the American Spinal Cord Injur…	Novartis	All	18 Years to 65 Years ¬† (Adult, Older Adult)	Phase 1	52	Industry	Interventional	Allocation: Non-Randomized|Intervention Model: Single Group Assignment|Masking: None (Open Label)|Primary Purpose: Treatment	CATI355A2102	2006-05-01	2011-09-01	2011-09-01	2006-12-04		2020-02-11	Novartis Investigative site, Calgary, Canada|Novartis Investigative site, Montreal, Canada|Novartis Investigative site, Toronto, Canada|Novartis Investigative site, Vancouver, Canada|Novartis Investigative site, Bad Wildungen, Germany|Novartis Investigative site, Bayreuth, Germany|Novartis Investigative site, Bochum, Germany|Novartis Investigative site, Hamburg, Germany|Novartis Investigative sit…		https://ClinicalTrials.gov/show/NCT00406016
NCT00856440	Safety and Efficacy of Routine Colonoscopy Preparations		Completed	No Results Available	Spinal Cord Injury	Drug: Fleets Oral Sodium Phosphate Solution (OSPS)|Drug: Colyte|Drug: Dual (OSPS & Colyte)	Renal Function (GFR, creatinine clearance)|Quality of bowel preparation (Ottawa Score)	US Department of Veterans Affairs|VA Office of Research and Development	All	18 Years and older ¬† (Adult, Older Adult)		330	U.S. Fed	Observational	Time Perspective: Prospective	B4162C-1|2380-06-031	2006-06-01	2008-12-01	2008-12-01	2009-03-05		2010-07-16	VA Medical Center, Bronx, Bronx, New York, United States		https://ClinicalTrials.gov/show/NCT00856440
NCT01988142	The Effect of Continuous Passive Motion Training on Neuromuscular Adaptation		Completed	No Results Available	Spinal Cord Injury(SCI)	Procedure: Ankle continuous passive motion machine.	Muscle tone tests|Fatigue index of muscle	Chang Gung University	All	20 Years and older ¬† (Adult, Older Adult)	Not Applicable	7	Other	Interventional	Allocation: N/A|Intervention Model: Single Group Assignment|Masking: None (Open Label)|Primary Purpose: Treatment	95-0973B	2006-08-01	2008-07-01	2008-07-01	2013-11-20		2013-11-20	Chang Gung University, Taoyuan, Taiwan		https://ClinicalTrials.gov/show/NCT01988142
NCT00378664	Lumbar to Sacral Ventral Nerve Re-Routing		Completed	No Results Available	Urinary Incontinence|Spinal Cord Injury|Spina Bifida	Procedure: lumbar to sacral ventral nerve re-routing procedure	Assess the level of improvement in voiding function after lumbar to sacral ventral nerve re-routing procedure in SCI and spina bifida patients.|Assess the effect of lumbar to sacral ventral the nerve re-routing on bowel function in SCI and spina bifida patients|Assess the effect of the lumbar to sacral ventral nerve re-routing on health related quality of life in SCI and spina bifida patients|Ass…	Kenneth Peters, MD|William Beaumont Hospitals	All	6 Years and older ¬† (Child, Adult, Older Adult)	Phase 2	13	Other	Interventional	Allocation: N/A|Intervention Model: Single Group Assignment|Masking: None (Open Label)|Primary Purpose: Treatment	2006-124	2006-09-01	2015-01-01	2015-01-01	2006-09-21		2015-10-14			https://ClinicalTrials.gov/show/NCT00378664
NCT00883142	Functional and Physiological Responses to Lokomat Therapy (Pilot Study)		Completed	No Results Available	Spinal Cord Injuries|Multiple Sclerosis|Stroke		This pilot study for power calculations on future studies that will characterize the potential benefits of Lokomat rehabilitation training on cardiovascular function, body composition and endocrine/metabolic function	US Department of Veterans Affairs|VA Office of Research and Development	All	18 Years and older ¬† (Adult, Older Adult)		27	U.S. Fed	Observational	Observational Model: Cohort|Time Perspective: Prospective	B4162C-11	2006-10-01	2012-08-01	2013-03-01	2009-04-17		2013-06-11	VA Medical Center, Bronx, Bronx, New York, United States		https://ClinicalTrials.gov/show/NCT00883142
NCT01091727	Intravesical Injection of Botulinum Toxin A Versus Saline for Neurogenic Detrusor Overactivity		Completed	No Results Available	Neurogenic Detrusor Overactivity	Drug: Botulinum toxin A	Efficacy	Sunnybrook Health Sciences Centre|ethica Clinical Research Inc.	All	18 Years to 75 Years ¬† (Adult, Older Adult)	Phase 3	57	Other|Industry	Interventional	Allocation: Randomized|Intervention Model: Parallel Assignment|Masking: Double (Participant, Investigator)|Primary Purpose: Treatment	922006	2006-10-01	2009-04-01	2009-04-01	2010-03-24		2010-03-24	Sunnybrook Health Sciences Centre, Toronto, Ontario, Canada		https://ClinicalTrials.gov/show/NCT01091727
NCT00432289	Acupuncture for Treatment of Acute Spinal Cord Injury: an Exploratory/Developmental Study		Completed	No Results Available	Spinal Cord Injury	Procedure: Acupuncture	ASIA Standards for Neurological Classification of SCI	Craig Hospital	All	16 Years and older ¬† (Child, Adult, Older Adult)	Phase 1|Phase 2	30	Other	Interventional	Allocation: Randomized|Intervention Model: Parallel Assignment|Masking: Double (Participant, Investigator)|Primary Purpose: Treatment	R21AT002763	2006-11-01	2009-06-01	2009-06-01	2007-02-07		2010-06-11	Craig Hospital, Englewood, Colorado, United States		https://ClinicalTrials.gov/show/NCT00432289
NCT00412308	A Comparison of High vs. Low Tidal Volumes in Ventilator Weaning for Individuals With Cervical Spinal Cord Injuries		Completed	No Results Available	Spinal Cord Injury|Respiratory Insufficiency	Procedure: Tidal volume used in mechanical ventilation	Time to full weaning from ventilator|Episodes of atelectasis|Episodes of ventilator-acquired pneumonia|Episodes of barotrauma|Episodes of acute respiratory distress syndrome	Craig Hospital	All	18 Years to 55 Years ¬† (Adult)	Not Applicable	34	Other	Interventional	Allocation: Randomized|Intervention Model: Parallel Assignment|Masking: None (Open Label)|Primary Purpose: Treatment	H133N060005	2006-12-01	2010-06-01	2010-08-01	2006-12-18		2011-06-28	Craig Hospital, Englewood, Colorado, United States		https://ClinicalTrials.gov/show/NCT00412308
NCT00987155	Spinal Cord Injury: Endurance, Strength and Cardiac Function Induced by Efficient Training Protocols		Completed	No Results Available	Cardiovascular Disease	Device: Ergometry	Maximal oxygen uptake|Blood lactate|Blood Pressure|Perceived Exertion|Generated power (W)	Norwegian University of Science and Technology|St. Olavs Hospital	All	18 Years to 70 Years ¬† (Adult, Older Adult)	Not Applicable	12	Other	Interventional	Allocation: N/A|Intervention Model: Single Group Assignment|Masking: None (Open Label)|Primary Purpose: Basic Science	4.2007.2271	2007-01-01	2012-02-01	2012-05-01	2009-09-30		2017-01-18	St Olav University Hospital, Trondheim, Norway		https://ClinicalTrials.gov/show/NCT00987155
NCT00488280	Restoring Walking in Non-ambulatory Children With Severe Chronic Spinal Cord Injury (SCI) (Kids STEP Study)		Completed	No Results Available	Spinal Cord Injury (SCI)	Behavioral: Locomotor Training	Recovery of walking, assessed in treadmill/ BWS environment and overground|Amount of daily step activity|Walking independence, WISCI II|Stepping assessment and kinematic analysis|Analysis of locomotor tasks such as crawling, swimming, cycling|Self-selected and fast gait speed|Spinal MRI to assess injury|Spinal reflex assessment (H reflex)|Correlation of locomotion recovery and isolated voluntary …	University of Florida|The Craig H. Neilsen Foundation|Brooks Rehabilitation|Baylor College of Medicine	All	3 Years to 13 Years ¬† (Child)	Phase 1	7	Other	Interventional	Allocation: N/A|Intervention Model: Single Group Assignment|Masking: None (Open Label)|Primary Purpose: Treatment	313-2006	2007-02-01	2012-09-01	2012-09-01	2007-06-20		2013-01-08	University of Florida, Gainesville, Florida, United States		https://ClinicalTrials.gov/show/NCT00488280
NCT02074670	fMRI In Spinal Cord Injury Patient After Rehabilitation		Completed	No Results Available	Spinal Cord Injury	Other: Treadmill gait training	Cortical Motor Area|Functional Index	University of Nove de Julho|Universidade do Vale do Para√≠ba|University of Barcelona	All	15 Years to 65 Years ¬† (Child, Adult, Older Adult)	Not Applicable	7	Other	Interventional	Allocation: N/A|Intervention Model: Single Group Assignment|Masking: None (Open Label)|Primary Purpose: Treatment	PL003	2007-02-01	2008-02-01		2014-02-28		2014-02-28	Paulo Roberto Garcia Lucareli, S√£o Paulo, Brazil		https://clinicaltrials.gov/ct2/show/NCT02074670
NCT03914456	Assessment of Neurorehabilitation in Spinal Cord Injury Using Neuroimage Tools.		Completed	No Results Available	Injuries, Spinal Cord	Other: rehabilitation treatment	Changes in blood oxygen level (BOLD) signal after motor rehabilitation, evaluated by functional magnetic resonance imaging study (fMRI)	Universidade do Vale do Para√≠ba	All	15 Years to 80 Years ¬† (Child, Adult, Older Adult)	Not Applicable	7	Other	Interventional	Allocation: N/A|Intervention Model: Single Group Assignment|Masking: None (Open Label)|Primary Purpose: Treatment	2007/3639	2007-02-02	2007-09-02	2007-11-15	2019-04-16		2019-04-16			https://ClinicalTrials.gov/show/NCT03914456
NCT00656149	In-home Telerehabilitation for Quadriplegic Hand Function	SCI-IHT	Completed	No Results Available	Spinal Cord Injury|Quadriplegia|Tetraplegia	Procedure: Telerehabilitation of hand function|Procedure: Conventional exercise therapy	Action Research Arm Test|Transcranial magnetic stimulation	University of Alberta|International Spinal Research Trust|Alberta Heritage Foundation for Medical Research	All	18 Years and older ¬† (Adult, Older Adult)	Phase 2|Phase 3	13	Other	Interventional	Allocation: Randomized|Intervention Model: Crossover Assignment|Masking: Double (Participant, Outcomes Assessor)|Primary Purpose: Treatment	SCI-IHT|ISRT-G700000249 PY107	2007-05-01	2010-12-01	2010-12-01	2008-04-10		2017-01-12	Centre for Neuroscience, University of Alberta, Edmonton, Alberta, Canada		https://ClinicalTrials.gov/show/NCT00656149
NCT00448045	Preventing Pneumonia and Other Respiratory Problems in Persons With Spinal Cord Injury		Completed	No Results Available	Spinal Cord Injury	Behavioral: Manual and mechanical assisted cough|Behavioral: Incentive spirometry	Reductions in episodes of community acquired pneumonia (CAP) and related severe respiratory complications|Reductions in hospitalizations due to a primary diagnosis of a respiratory complications|Duration of illness and hospitalization|Impact of respiratory complications on quality of life and participation	Kessler Foundation|U.S. Department of Education	All	18 Years to 70 Years ¬† (Adult, Older Adult)	Phase 2	120	Other|U.S. Fed	Interventional	Allocation: Randomized|Intervention Model: Parallel Assignment|Masking: Double (Participant, Outcomes Assessor)|Primary Purpose: Prevention	H133N060022	2007-06-01	2012-12-01	2012-12-01	2007-03-15		2013-01-15	Kessler Institute for Rehabilitation, West Orange, New Jersey, United States		https://ClinicalTrials.gov/show/NCT00448045
NCT00488969	Effectiveness of Controlled-Release Morphine for Chronic Neuropathic Pain After Spinal Cord Injury		Completed	No Results Available	Neuropathic Pain|Spinal Cord Injury	Drug: Modified-release morphine|Drug: Placebo	Pain severity|Short McGill Pain Questionnaire (modified) (SF-McGill)|Opioids cognitive effects scale|Patient Generated Index for activity (PGI)|Daily number of attacks of paroxysmal pain|Quantitative sensory testing|Subject global impression of change|Short-Form 36 (SF-36)|Positive And Negative Affect Schedule (PANAS)|Brief Patient Health Questionnaire (PHQ-9)|Multidimensional Pain Inventory Life…	Icahn School of Medicine at Mount Sinai|U.S. Department of Education	All	18 Years to 65 Years ¬† (Adult, Older Adult)	Phase 2	17	Other|U.S. Fed	Interventional	Allocation: Randomized|Intervention Model: Crossover Assignment|Masking: Triple (Participant, Investigator, Outcomes Assessor)|Primary Purpose: Treatment	H133N060027|GCO # 90-135	2007-07-01	2013-07-01	2013-07-01	2007-06-20		2016-03-22	Mount Sinai School of Medicine, New York, New York, United States		https://ClinicalTrials.gov/show/NCT00488969
NCT00623376	Randomized Double Blind Cross Over Study for Nabilone in Spasticity in Spinal Cord Injury Persons		Completed	No Results Available	Spasticity in Spinal Cord Injured Persons	Drug: nabilone then placebo|Drug: placebo then nabilone	Ashworth scale in most involved group muscles|The secondary outcomes included Spasm Frequency Scale, Visual Analog Scale, Wartenberg Pendulum Test, sum of the Ashworth Scale in eight muscle groups of each side of the body, and the Clinician's and Subject's Global Impression of Change .	University of Manitoba|Valeant Canada Limited	All	18 Years and older ¬† (Adult, Older Adult)	Phase 2		Other|Industry	Interventional		4940	2007-07-01	2007-11-01	2007-12-01	2008-02-26		2008-02-26	Rehabilitation hospital ,800 sherbrook St., Winnipeg, Manitoba, Canada		https://ClinicalTrials.gov/show/NCT00623376
NCT00693563	Scheduled Telephone Intervention for Individuals With Spinal Cord Injury and Their Families	SCILink	Completed	No Results Available	Spinal Cord Injury	Behavioral: Scheduled Telephone Intervention	Counts of rehospitalizations (frequency and duration), emergency department visits, and clinic visits to address medical complications|Composite of 4 measures to assess adjustment to SCI: Center for Epidemiologic Studies-Depression Scale (CES-D)79; Perceived Quality of Life (PQOL)80; Craig Handicap and Reporting Technique (CHART)81; Health-Promoting Lifestyle Profile II82	Jeanne Hoffman|U.S. Department of Education|University of Washington	All	16 Years and older ¬† (Child, Adult, Older Adult)	Not Applicable	168	Other|U.S. Fed	Interventional	Allocation: Randomized|Intervention Model: Parallel Assignment|Masking: Single (Outcomes Assessor)|Primary Purpose: Supportive Care	32148-G	2007-08-01	2011-10-01	2011-10-01	2008-06-09		2013-01-11	Harborview Medical Center, Seattle, Washington, United States|University of Washington Medical Center, Seattle, Washington, United States		https://ClinicalTrials.gov/show/NCT00693563
NCT01143597	Improving Hand and Arm Function After Spinal Cord Injury (SCI)		Completed	No Results Available	Spinal Cord Injury	Other: Arm and hand training	The Jebsen-Taylor Hand Function Test|Cortical motor excitability via transcranial magnetic stimulation (TMS)	University of Miami|National Institutes of Health (NIH)	All	16 Years to 70 Years ¬† (Child, Adult, Older Adult)	Not Applicable	48	Other|NIH	Interventional	Allocation: Randomized|Intervention Model: Parallel Assignment|Masking: Single (Outcomes Assessor)|Primary Purpose: Treatment	R01HD053854	2007-08-01	2013-08-01	2013-08-01	2010-06-14		2013-10-10	The Miami Project to Cure Paralysis, Miami, Florida, United States		https://ClinicalTrials.gov/show/NCT01143597
NCT00431171	Safety and Pharmacokinetics Study of Oral Lithium in Patients With Chronic Spinal Cord Injury		Completed	No Results Available	Spinal Cord Injuries	Drug: Lithium carbonate	Incidence of clinical adverse events including known and unknown adverse events, and changes from baseline in vital signs, ECGs and laboratory parameters|Plasma lithium level	The University of Hong Kong|China Spinal Cord Injury Network	All	18 Years to 60 Years ¬† (Adult)	Phase 1	20	Other	Interventional	Allocation: Non-Randomized|Intervention Model: Single Group Assignment|Masking: None (Open Label)|Primary Purpose: Treatment	CN101	2007-09-01	2010-01-01	2010-01-01	2007-02-05		2012-01-16	MacLehose Medical Rehabilitation Centre, Pokfulam, Hong Kong SAR, China		https://ClinicalTrials.gov/show/NCT00431171
NCT00523016	Acupuncture Treatment to Reduce Burning Pain in Spinal Cord Injury	APSCI	Completed	No Results Available	Neuropathic Pain	Procedure: Lyndhurst Central Neuropathic Pain Acupuncture Protocol (LCCNPAP)|Procedure: Sham acupuncture	Improvement in burning pain|Improvement in Quality of Life measurements	Toronto Rehabilitation Institute|Canadian Institutes of Health Research (CIHR)|University of British Columbia	All	18 Years and older ¬† (Adult, Older Adult)	Not Applicable	33	Other	Interventional	Allocation: Randomized|Intervention Model: Parallel Assignment|Masking: Double (Participant, Outcomes Assessor)|Primary Purpose: Treatment	TRI REB # 07-045	2007-09-01	2013-04-01	2013-05-01	2007-08-30		2013-05-22	G. F. Strong Rehabilitation Centre, Vancouver, British Columbia, Canada|Parkwood Hospital, London, Ontario, Canada|Toronto Rehabilitation Institute Lyndhurst Centre, Toronto, Ontario, Canada		https://ClinicalTrials.gov/show/NCT00523016
NCT00778323	Clinical Trial of Remote Preconditioning in Patients Undergoing Cervical Decompression Surgery		Completed	No Results Available	Cervical Compression Myelopathy|Ischemia|Reperfusion Injury|Spinal Cord Injury	Procedure: limb remote ischemic preconditioning (LRIPC)	serum concentrations of s-100B,NSE|a Japanese Orthopaedic Association (JOA) scale	Xijing Hospital	All	30 Years to 75 Years ¬† (Adult, Older Adult)	Phase 1|Phase 2	51	Other	Interventional	Allocation: Randomized|Intervention Model: Parallel Assignment|Masking: Double (Participant, Outcomes Assessor)|Primary Purpose: Prevention	XJ20070901	2007-09-01	2008-10-01	2009-04-01	2008-10-23		2011-02-25	Xijing Hospital, Xi'an, Shaanxi, China		https://ClinicalTrials.gov/show/NCT00778323
NCT00974168	Spinal Cord Compression Re-Treat Study		Completed	No Results Available	Pain|Radiation Toxicity|Spinal Cord Compression|Unspecified Adult Solid Tumor, Protocol Specific	Radiation: Cumulative BED ‚â§ 100|Radiation: Cumulative BED ‚â§ 130 Gy2	Response to treatment as assessed by mobility via the Tomita mobility scale|Overall response rate (stabilization and response) (stage I)|Incidence of radiation-induced myelopathy via the RTOG SOMA morbidity grading system|Toxicity other than spine (acute toxicity assessed at weeks 1 and 5 and late toxicity assessed at 3 months and at subsequent follow-ups) evaluated according to RTOG criteria|Pai…	Cancer Trials Ireland	All	18 Years to 120 Years ¬† (Adult, Older Adult)	Phase 2	22	Other	Interventional	Allocation: Non-Randomized|Intervention Model: Parallel Assignment|Masking: None (Open Label)|Primary Purpose: Treatment	CTRIAL-IE (ICORG) 07-11|ICORG 07-11|EU-20953	2007-10-01	2016-12-01	2018-09-27	2009-09-10		2019-07-29	Saint Luke's Radiation Oncology Network, Dublin, Ireland|Galway University Hospital, Galway, Ireland		https://ClinicalTrials.gov/show/NCT00974168
NCT00727584	Radiation Therapy in Treating Patients With Metastatic Spinal Cord Compression		Completed	No Results Available	Spinal Cord Compression|Unspecified Adult Solid Tumor, Protocol Specific	Radiation: radiation therapy	Patient accrual per center over a 12-month period|Ambulatory status at 1, 4, 8, and 12 weeks from day 1 of treatment compared to baseline|Bladder and bowel function at 1, 4, 8, and 12 weeks from day 1 of treatment compared to baseline|Acute side effects using RTOG scales at 1, 4, 8, and 12 weeks from day 1 of treatment|Quality of life as measured by the EORTC QLQ-C30 questionnaire at 1, 4, 8, and…	Cancer Research UK|National Cancer Institute (NCI)	All	18 Years and older ¬† (Adult, Older Adult)	Not Applicable	100	Other	Interventional	Allocation: Randomized|Primary Purpose: Treatment	CDR0000599886|CRUK-UCL-BRD-07-010|CRUK-SCORAD|ISRCTN97555949|EU-20863	2007-11-01	2009-02-01	2009-08-01	2008-08-04		2013-08-26	Bristol Haematology and Oncology Centre, Bristol, England, United Kingdom|Cancer Research UK and University College London Cancer Trials Centre, Northwood, England, United Kingdom|Glan Clwyd Hospital, Rhyl, Denbighshire, Wales, United Kingdom|Christie Hospital, Manchester, United Kingdom		https://ClinicalTrials.gov/show/NCT00727584
NCT01500174	Ultraviolet-C Effectiveness in the Management of Pressure Ulcers in People With Spinal Cord Injury		Completed	No Results Available	Pressure Ulcer	Device: ultraviolet therapy UV254|Device: Placebo ultraviolet therapy UV254	Change in ulcer area relative to baseline|Mean change in ulcer area between consecutive weeks|Change in Photographic Wound Assessment Tool (PWAT)|Change in Cardiff Wound Impact Schedule (CWIS)|Follow-up wound status	Toronto Rehabilitation Institute|Ontario Neurotrauma Foundation	All	18 Years and older ¬† (Adult, Older Adult)	Not Applicable	43	Other	Interventional	Allocation: Randomized|Intervention Model: Parallel Assignment|Masking: Quadruple (Participant, Care Provider, Investigator, Outcomes Assessor)|Primary Purpose: Treatment	SCI-2007-BDRST-465	2007-11-01	2010-05-01	2011-05-01	2011-12-28		2012-09-05	Toronto Rehabilitation Institute, Toronto, Ontario, Canada		https://ClinicalTrials.gov/show/NCT01500174
NCT01572376	Autologous Bone Marrow Stem Cells in Pressure Ulcer Treatment		Completed	No Results Available	Type IV Pressure Ulcers|Chronic Wounds|Spinal Cord Injury	Procedure: Infusion of autologous bone marrow stem cells after wound debridement.	Absence of adverse effects during timeframe as infections or complications related with the intervention.|Improvement and closure of the pressure ulcer	Hospital Universitario Central de Asturias	All	18 Years to 75 Years ¬† (Adult, Older Adult)	Phase 1|Phase 2	30	Other	Interventional	Allocation: Non-Randomized|Intervention Model: Single Group Assignment|Masking: Single (Outcomes Assessor)|Primary Purpose: Treatment	HUCentralAsturias	2007-11-01	2008-12-01	2010-12-01	2012-04-06		2015-08-25	Hospital Universitario Central de Asturias, Oviedo, Asturias, Spain		https://ClinicalTrials.gov/show/NCT01572376
NCT00557973	A Safety and Efficacy Study of XP19986 in Subjects With Spasticity Due to Spinal Cord Injury		Completed	No Results Available	Muscle Spasticity	Drug: XP19986 SR1, 10 mg BID|Drug: XP19986 SR1, 20 mg BID|Drug: XP19986 SR1, 30 mg BID|Drug: Placebo	Maximum Ashworth score|Average Ashworth score|Two Highest Ashworth scores|Average Non-zero Ashworth Scores	XenoPort, Inc.	All	18 Years to 65 Years ¬† (Adult, Older Adult)	Phase 2	37	Industry	Interventional	Allocation: Randomized|Intervention Model: Crossover Assignment|Masking: Quadruple (Participant, Care Provider, Investigator, Outcomes Assessor)|Primary Purpose: Treatment	XP-B-065	2007-12-01	2009-04-01	2009-04-01	2007-11-14		2021-02-21	Downey, California, United States|Gilroy, California, United States|Pasadena, California, United States|San Jose, California, United States|Englewood, Colorado, United States|Miami, Florida, United States|Atlanta, Georgia, United States|Chicago, Illinois, United States|Kansas City, Kansas, United States|Ann Arbor, Michigan, United States|Detroit, Michigan, United States		https://ClinicalTrials.gov/show/NCT00557973
NCT00857831	Vitamin D and Calcium Study		Completed	No Results Available	Spinal Cord Injury	Dietary Supplement: Vitamin D and Calcium	Effects of Vitamin D and Calcium supplements on calcium metabolism and vitamin D deficiency	US Department of Veterans Affairs|Kessler Foundation|VA Office of Research and Development	All	18 Years to 75 Years ¬† (Adult, Older Adult)	Not Applicable	10	U.S. Fed|Other	Interventional	Allocation: Non-Randomized|Intervention Model: Single Group Assignment|Masking: None (Open Label)|Primary Purpose: Treatment	B4162C-8	2008-01-01	2012-01-01	2012-08-01	2009-03-09		2012-10-03	VA Medical Center, Bronx, Bronx, New York, United States		https://ClinicalTrials.gov/show/NCT00857831
NCT01186679	Safety and Efficacy of Autologous Bone Marrow Stem Cells in Treating Spinal Cord Injury	ABMST-SCI	Completed	No Results Available	Spinal Cord Injuries	Procedure: laminectomy|Procedure: Intrathecal	Number of Participants with adverse events as a measure of safety and tolerability. Significant clinical improvement in ASIA impairment scale and general condition|Changes in the MRI, Neurological improvement (cranial/spinal reflexes) and evoked potentials study	International Stemcell Services Limited	All	20 Years to 55 Years ¬† (Adult)	Phase 1|Phase 2	12	Industry	Interventional	Allocation: Non-Randomized|Intervention Model: Parallel Assignment|Masking: None (Open Label)|Primary Purpose: Treatment	ISSL-AuBM-SCI	2008-01-01	2010-02-01	2010-08-01	2010-08-23		2010-08-23	Sita Bhateja Speciality Hospital, Bangalore, Karnataka, India		https://ClinicalTrials.gov/show/NCT01186679
NCT01573936	Quality of Life in Adult Neurological Patients		Completed	No Results Available	Spinal Cord Injury|Acquired Brain Injury|Poliomyelitis	Other: Physical therapy, occupational therapy, psycotherapy, medical consultations	WHOQOL-BREF	Associa√ß√£o de Assist√™ncia a Crian√ßa Deficiente	All	19 Years to 74 Years ¬† (Adult, Older Adult)	Not Applicable	70	Other	Interventional	Allocation: N/A|Intervention Model: Single Group Assignment|Masking: None (Open Label)|Primary Purpose: Treatment	Yoshihara_AACD2011	2008-01-01	2010-09-01	2011-12-01	2012-04-10		2012-04-10			https://ClinicalTrials.gov/show/NCT01573936
NCT02560506	Development of Low Cost Devices to Increase Access to Treadmill Training		Completed	No Results Available	Spinal Cord Injury	Device: Elastic assisted treadmill walking	Change in locomotor performance during treadmill walking|Change in oxygen consumption	Shirley Ryan AbilityLab	All	18 Years to 75 Years ¬† (Adult, Older Adult)	Not Applicable	19	Other	Interventional	Allocation: N/A|Intervention Model: Single Group Assignment|Masking: None (Open Label)|Primary Purpose: Treatment	Model Systems	2008-01-01	2016-09-01	2016-09-01	2015-09-25		2016-12-28	Rehabilitation Institute of Chicago, Chicago, Illinois, United States		https://ClinicalTrials.gov/show/NCT02560506
NCT00135278	Cerebrospinal Fluid (CSF) Drainage and Cytokine Profiling in the Treatment of Acute Spinal Cord Injury (SCI)		Completed	No Results Available	Spinal Cord Injuries	Procedure: CSF Drainage|Procedure: No CSF Drainage	To evaluate the safety and feasibility of CSF drainage as a potential treatment for patients with acute SCI|To determine if CSF drainage will improve neurologic function after acute SCI|To evaluate the temporal pattern of expression of inflammatory cytokines within the CSF	University of British Columbia	All	17 Years to 65 Years ¬† (Child, Adult, Older Adult)	Not Applicable	31	Other	Interventional	Allocation: Non-Randomized|Intervention Model: Parallel Assignment|Masking: Single (Participant)|Primary Purpose: Treatment	C04-0584|V05-0160	2008-03-01	2009-01-27	2010-01-14	2005-08-25		2017-10-26	Vancouver General Hospital, Vancouver, British Columbia, Canada		https://ClinicalTrials.gov/show/NCT00135278
NCT00610974	Enhancing Walking in People With Incomplete Spinal Cord Injury: a Pilot Study		Completed	No Results Available	Motor-incomplete Spinal Cord Injury	Behavioral: Body-weight supported treadmill training	The primary outcome is functional ambulation measured before, after, 1-month after, and 6-months after training.|Average activity level per day measured before, after, 1-month after, and 6-months after training	University of British Columbia	All	19 Years to 65 Years ¬† (Adult, Older Adult)	Not Applicable	15	Other	Interventional	Allocation: Randomized|Intervention Model: Parallel Assignment|Masking: Single (Care Provider)|Primary Purpose: Treatment	H07-01394	2008-03-01	2011-07-01	2011-07-01	2008-02-08		2014-09-25	Human Locomotion Lab, University of British Columbia, Vancouver, British Columbia, Canada		https://ClinicalTrials.gov/show/NCT00610974
NCT00634426	Surgical Versus Nonoperative Treatment of Metastatic Epidural Spinal Cord Compression	MESCC	Completed	No Results Available	Metastatic Epidural Spinal Cord Compression	Procedure: Surgical excision of the metastatic process|Radiation: Radiotherapy of the metastatic spine process	Change in spine-associated pain intensity (BPI) measured by Brief Pain Inventory|Neurological outcomes measured by American Spinal Injury Association (ASIA) Motor Scale structured clinical examination|Survival|SF-36 v2|EQ-5D|Oswestry Disability Index (ODI)|Caregiver Activity Survey|Adverse events	AOSpine North America Research Network|AOSpine North America	All	18 Years and older ¬† (Adult, Older Adult)		163	Other|Industry	Observational	Observational Model: Cohort|Time Perspective: Prospective	1011	2008-03-01	2013-03-01	2013-03-01	2008-03-13		2015-05-21	University of Kansas Medical Center, Kansas City, Kansas, United States|Johns Hopkins University, Baltimore, Maryland, United States|Mayo Clinic, Rochester, Minnesota, United States|Hospital of the University of Pennsylvania, Philadelphia, Pennsylvania, United States|Thomas Jefferson University and The Rothman Institute, Philadelphia, Pennsylvania, United States|University of Texas Hospital / MD …		https://ClinicalTrials.gov/show/NCT00634426
NCT00800462	Comparative Study of the Efficacy and Safety of Muscarinic M3 Receptors Antagonists in the Treatment of Neurogenic Detrusor Overactivity		Completed	No Results Available	Spinal Cord Injury|Neurogenic Detrusor Overactivity	Drug: Oxybutynin Cl|Drug: Trospium Cl|Drug: Darifenacin Hydrogen Bromide (HBr)	Frequency of Incontinence Episodes|Adverse Event Reporting|Urodynamic Study|Questionnaires	Toronto Rehabilitation Institute|Ontario Neurotrauma Foundation	All	18 Years to 75 Years ¬† (Adult, Older Adult)	Phase 4	23	Other	Interventional	Allocation: Randomized|Intervention Model: Parallel Assignment|Masking: Quadruple (Participant, Care Provider, Investigator, Outcomes Assessor)|Primary Purpose: Treatment	2007-SCI-M3-488	2008-03-01	2012-06-01	2012-12-01	2008-12-02		2013-04-08	University of Manitoba, Health Sciences Centre, Winnipeg, Manitoba, Canada|Toronto Rehabilitation Institute, Lyndhurst Centre, Toronto, Ontario, Canada		https://ClinicalTrials.gov/show/NCT00800462
NCT01202019	Effects of Exercise in People With Tetraplegia		Completed	No Results Available	Spinal Cord Injury|Tetraplegia	Other: Circuit Resistance Training (CRT)	Area Under the Curve (AUC) for lipemia	University of Miami	All	18 Years to 55 Years ¬† (Adult)	Not Applicable	18	Other	Interventional	Allocation: Randomized|Intervention Model: Parallel Assignment|Masking: None (Open Label)|Primary Purpose: Prevention	TMP-MN-005	2008-03-01	2011-09-01	2011-09-01	2010-09-15		2014-07-22	The Miami Project to Cure Paralysis, Miami, Florida, United States		https://ClinicalTrials.gov/show/NCT01202019
NCT01781065	The Effects of Transcranial Direct Current Stimulation on Central Pain in Patients With Spinal Cord Injury		Completed	No Results Available	Neuropathic Pain|Spinal Cord Injury	Device: transcranial direct current stimulation	Numeric rating scale for average pain over the preceding 24h|Patient global impression of change for pain	Seoul National University Bundang Hospital	All	30 Years to 60 Years ¬† (Adult)	Phase 2	16	Other	Interventional	Allocation: Non-Randomized|Intervention Model: Parallel Assignment|Masking: Double (Participant, Investigator)|Primary Purpose: Treatment	11-2008-010 SNUBH	2008-03-01	2009-02-01	2013-06-01	2013-01-31		2013-07-15	Seoul National University Bundang Hospital, Seongnam-si, Gyeonggi-do, Korea, Republic of		https://ClinicalTrials.gov/show/NCT01781065
NCT00629642	Clinical Study of Solifenacin Succinate in Patients With Bladder Symptoms Due to Spinal Cord Injury or Multiple Sclerosis	SONIC	Completed	No Results Available	Multiple Sclerosis|Neurogenic Bladder|Spinal Cord Diseases	Drug: Solifenacin Succinate|Drug: Oxybutynin Hydrochloride|Drug: Placebo	Change from baseline in maximum cystometric capacity|Change from baseline in bladder volume at first involuntary contraction|Change from baseline in pressure at first leak|Change from baseline in volume at first leak|Change from baseline in maximum detrusor pressure|Change from baseline in micturition or catheterization frequency|Change from baseline in incontinence episodes|Incidence and severit…	Astellas Pharma Inc	All	18 Years to 65 Years ¬† (Adult, Older Adult)	Phase 4	249	Industry	Interventional	Allocation: Randomized|Intervention Model: Parallel Assignment|Masking: Quadruple (Participant, Care Provider, Investigator, Outcomes Assessor)|Primary Purpose: Treatment	905-EC-005|2006-005523-42	2008-03-14	2011-01-28	2011-01-28	2008-03-06		2017-09-01	Brisbane, Australia|Melbourne, Australia|Perth, Australia|Randwick, Australia|Antwerpen, Belgium|Esneux, Belgium|Fraiture-en-Condroz, Belgium|Gent, Belgium|Leuven, Belgium|Melsbroek, Belgium|Brno, Czechia|Ceske Budejovice, Czechia|Prague, Czechia|Caen, France|Garches, France|Paris, France|Ploemeur, France|Berlin, Germany|Hagenow, Germany|Heidelberg, Germany|Kiel, Germany|Nyiregyhaza, Hungary|Sopr…		https://ClinicalTrials.gov/show/NCT00629642
NCT00866112	A Randomized Exercise Trial for Wheelchair Users		Completed	No Results Available	Spinal Cord Injury|Multiple Sclerosis|Muscular Dystrophy|Cerebral Palsy|Spina Bifida|Amputation|Arthritis|Stroke	Other: Educational session to promote physical activity|Other: Minimal contact	Weekly minutes spent in aerobic and strengthening activity	University of Kansas|University of Kansas Medical Center	All	18 Years to 65 Years ¬† (Adult, Older Adult)	Not Applicable	135	Other	Interventional	Allocation: Randomized|Intervention Model: Parallel Assignment|Masking: None (Open Label)	10053	2008-05-01	2011-02-01	2012-06-01	2009-03-20		2012-06-15	University of Kansas, Lawrence, Kansas, United States		https://ClinicalTrials.gov/show/NCT00866112
NCT00854555	The ATLET Study: Can Subjects With Incomplete Spinal Cord Injury Learn to Walk?	ATLET	Completed	No Results Available	Spinal Cord Injury	Other: Locomotor training with robot|Other: Locomotor training with manual assistance	To assess whether locomotor training with body-weight support in patients with motor incomplete SCI results in full or partial recovery of the ability to walk and/or stand.|Patients with motor incomplete SCI are able to improve ADL function after locomotor training.|Locomotor training is cost-effective rehabilitation.|Locomotor training in persons with motor incomplete SCI will lead to change in …	North Norway Rehabilitation Center|Sunnaas Rehabilitation Hospital|Norwegian School of Sport Sciences|University of Tromso|University of Oslo|Norwegian Foundation for Health and Rehabilitation|Norwegian Department of Health and Social Affairs|Loma Linda University	All	18 Years to 70 Years ¬† (Adult, Older Adult)	Not Applicable	44	Other	Interventional	Allocation: Randomized|Intervention Model: Parallel Assignment|Masking: Single (Outcomes Assessor)|Primary Purpose: Treatment	980924076|P REK 69/2008|P REK 2009-634	2008-08-01	2018-12-31	2019-01-31	2009-03-03		2020-09-11	Sunnaas Hospital, Oslo, Norway|North Norway Rehabilitation Center, Troms√∏, Norway	https://ClinicalTrials.gov/show/NCT00854555	https://ClinicalTrials.gov/show/NCT00854555
NCT01302522	Mental Practice Impact on Gait and Cortical Organization in Spinal Cord Injury (SCI)		Completed	No Results Available	Incomplete Spinal Cord Injury	Behavioral: Mental practice	Gait velocity: The investigators are measuring the speed that people walk.	University of Cincinnati	All	18 Years and older ¬† (Adult, Older Adult)	Phase 2		Other	Interventional	Allocation: Randomized|Masking: Single (Outcomes Assessor)|Primary Purpose: Treatment	1R21AT003842-01	2008-09-01	2010-07-01	2010-12-01	2011-02-24		2011-02-24			https://ClinicalTrials.gov/show/NCT01302522
NCT01999816	Pressure Ulcer Prevention Study in SCI	PUPS	Completed	No Results Available	Spinal Cord Injuries	Behavioral: Lifestyle Redesign	Incidence of serious pressure ulcers|Incidence of ulcer related surgeries|Quality of life|Healthcare service utilization|Life Satisfaction	University of Southern California|Eunice Kennedy Shriver National Institute of Child Health and Human Development (NICHD)	All	18 Years and older ¬† (Adult, Older Adult)	Phase 3	170	Other|NIH	Interventional	Allocation: Randomized|Intervention Model: Parallel Assignment|Masking: Single (Outcomes Assessor)|Primary Purpose: Prevention	HS-06-00064|R01HD056267	2008-09-01	2015-09-01	2015-09-01	2013-12-03		2016-10-27	Rancho Los Amigos National Rehabilitation Center (RLANRC), Downey, California, United States|University of Southern California, Los Angeles, California, United States		https://ClinicalTrials.gov/show/NCT01999816
NCT01203150	Effects of Exercise in People With Paraplegia		Completed	No Results Available	Spinal Cord Injury	Other: Exercise	Global cardiovascular disease risk score|Body composition|Cardiovascular Endurance|Muscular strength	University of Miami	All	18 Years to 65 Years ¬† (Adult, Older Adult)	Not Applicable	32	Other	Interventional	Allocation: Randomized|Intervention Model: Parallel Assignment|Masking: None (Open Label)|Primary Purpose: Prevention	TMP-MN-006	2008-10-01	2012-09-01	2012-09-01	2010-09-16		2015-03-24	The Miami Project to Cure Paralysis, Miami, Florida, United States		https://ClinicalTrials.gov/show/NCT01203150
NCT01197599	Acute Tendon and Nerve Responses to Exercise		Completed	No Results Available	Spinal Cord Injury		Nerve cross-sectional area	University of Miami	All	18 Years to 65 Years ¬† (Adult, Older Adult)		50	Other	Observational	Observational Model: Case-Control|Time Perspective: Cross-Sectional	TMP-MN-003	2008-12-01	2012-02-01	2012-02-01	2010-09-09		2014-07-22	The Miami Project to Cure Paralysis, Miami, Florida, United States		https://ClinicalTrials.gov/show/NCT01197599
NCT01477736	A Comparison Study of Oxybutynin and Botulinum Toxin for Neurogenic Detrusor Overactivity		Completed	No Results Available	Spinal Cord Injury	Drug: Oxybutynin|Drug: Botulinum toxin A	The primary study outcome measure was the variation mean in the number of episodes of urinary incontinence per 24 hours, maximum cystometric capacity, maximum detrusor pressure and bladder compliance|The secondary outcome measure was quality of life as measured by the Qualiveen questionnaire	Centro de Reabilita√ß√£o e Readapta√ß√£o Dr. Henrique Santillo	All	18 Years and older ¬† (Adult, Older Adult)	Not Applicable	68	Other	Interventional	Allocation: Randomized|Intervention Model: Parallel Assignment|Masking: None (Open Label)|Primary Purpose: Treatment	OXITBALM	2009-01-01	2010-11-01	2010-11-01	2011-11-22		2011-11-22	UNICAMP, Division of Urology, Campinas, Sao Paulo, Brazil		https://ClinicalTrials.gov/show/NCT01477736
NCT01135108	Safety and Efficacy Study of KAI-1678 to Treat Pain in Subjects With Spinal Cord Injury		Completed	No Results Available	Spinal Cord Injury	Drug: Placebo|Drug: KAI-1678	The effect of KAI-1678 on mean change from baseline in pain intensity at 6 hours (PID 6).|The effect of KAI-1678 on the proportion of subjects achieving at least a 1 point improvement in pain intensity at 6 hours|The effect of KAI-1678 on patient global impression of change|The effect of KAI-1678 on symptoms of neuropathic pain assessed by the Neuropathic Pain Scale (NPS)|The number of participan…	KAI Pharmaceuticals|Trident Clinical Research Pty Ltd	All	18 Years and older ¬† (Adult, Older Adult)	Phase 2	5	Industry	Interventional	Allocation: Randomized|Intervention Model: Crossover Assignment|Masking: Double (Participant, Investigator)|Primary Purpose: Treatment	KAI-1678-004	2009-03-01	2010-03-01	2010-05-01	2010-06-02		2011-09-01	Sydney, New South Wales, Australia		https://ClinicalTrials.gov/show/NCT01135108
NCT01251549	Safety and Performance Evaluation of ReWalk Reciprocating Gait Orthosis (RGO)		Completed	No Results Available	Paraplegia|Spinal Cord Injuries (SCI)	Device: ReWalk - a motorized exoskeleton suit	Safety of use|Efficacy	ReWalk Robotics, Inc.	All	18 Years to 55 Years ¬† (Adult)	Not Applicable	32	Industry	Interventional	Allocation: N/A|Intervention Model: Single Group Assignment|Masking: None (Open Label)|Primary Purpose: Supportive Care	RW003 ver. 4	2009-03-01	2013-03-01	2013-03-01	2010-12-02		2016-10-05	Albert Einstein Medical Center, Moss Rehabilitation Center, Elkins Park, Pennsylvania, United States|Ospedale Valduce di Como, Centro Villa Beretta Italy, Como, Italy		https://ClinicalTrials.gov/show/NCT01251549
NCT01831414	Effect of Immersion Level on Respiratory Function of Spinal Cord Injury Patients During Balneotherapy	BALNEORESPI	Completed	No Results Available	Spinal Cord Injury	Other: Water immersion at cervical level|Other: Water immersion at xyphoid level	Lung volumes|Respiratory comfort	Centre d'Investigation Clinique et Technologique 805|Fondation Garches	All	18 Years and older ¬† (Adult, Older Adult)	Not Applicable	15	Other	Interventional	Allocation: Randomized|Intervention Model: Crossover Assignment|Masking: None (Open Label)	2009-A00246-51	2009-06-01	2013-04-01	2013-04-01	2013-04-15		2013-05-06	Hopital Raymond Poincare, Garches, France		https://ClinicalTrials.gov/show/NCT01831414
NCT01274975	Autologous Adipose Derived MSCs Transplantation in Patient With Spinal Cord Injury.	MSC	Completed	No Results Available	Spinal Cord Injury	Other: Autologous Adipose Derived Mesenchymal Stem Cells	safety evaluation	R-Bio	Male	19 Years to 60 Years ¬† (Adult)	Phase 1	8	Industry	Interventional	Allocation: Randomized|Intervention Model: Single Group Assignment|Masking: None (Open Label)|Primary Purpose: Treatment	Astrostem	2009-07-01	2009-11-01	2010-02-01	2011-01-12		2014-03-26			https://ClinicalTrials.gov/show/NCT01274975
NCT00663663	Telephone Intervention for Pain Study (TIPS)	TIPS	Completed	No Results Available	Chronic Pain|Multiple Sclerosis|Amputation|Spinal Cord Injury	Behavioral: Telephone-Delivered Intervention 1|Behavioral: Telephone-Delivered Intervention 2	Average pain intensity|Physical Functioning-Brief Pain Inventory (Cleeland & Ryan, 1994)|Patient Health Questionnaire-8 (PHQ-8) (Kroenke & Spitzer, 2002)|Pain Catastrophizing Scale (Sullivan et al., 1995)	University of Washington|Eunice Kennedy Shriver National Institute of Child Health and Human Development (NICHD)	All	18 Years and older ¬† (Adult, Older Adult)	Not Applicable	207	Other|NIH	Interventional	Allocation: Randomized|Intervention Model: Parallel Assignment|Masking: Single (Outcomes Assessor)|Primary Purpose: Treatment	33597-G|R01HD057916-04	2009-09-01	2013-06-01	2013-06-01	2008-04-22		2013-08-30	University of Washington, Seattle, Washington, United States		https://ClinicalTrials.gov/show/NCT00663663
NCT01086930	Early Intensive Hand Rehabilitation After Spinal Cord Injury	SCIPAHandsOn	Completed	No Results Available	Spinal Cord Injury	Device: ReJoyce Workstation|Other: Standard Care	Modified Action Research Arm Test|Summed Upper Limb Strength of the Graded and Redefined Assessment of Strength Sensibility and Prehension|Sensory Score on ISNCSCI|AsTex Sensory Test|AuSpinal Test|Capabilities of Upper Extremity|Assessment of Quality of Life (AQoL)|Health Utilities Index Mark 3|Self-care subscale of the Spinal Cord Independence Measure|Goal Attainment Scale|Participant Perception…	University of Melbourne|Austin Hospital, Melbourne Australia|Hampstead Rehabilitation Centre Adelaide|Shenton Park Rehabilitation Centre Perth|Princess Alexandra Hospital, Brisbane, Australia|Royal Rehabilitation Centre Sydney|Prince of Wales Hospital, Sydney|Burwood Hospital, Christchurch, New Zealand	All	16 Years and older ¬† (Child, Adult, Older Adult)	Phase 3	70	Other	Interventional	Allocation: Randomized|Intervention Model: Parallel Assignment|Masking: Single (Outcomes Assessor)|Primary Purpose: Treatment	SCIPA Hands-On	2009-09-01	2012-12-01	2015-09-01	2010-03-15		2021-05-03	Spinal Unit, Prince of Wales Hospital, Randwick, New South Wales, Australia|Royal Rehabilitation Centre Sydney, Sydney, New South Wales, Australia|Queensland Spinal Cord Injury Service, Princess Alexandra Hospital, Woolloongabba, Queensland, Australia|South Australian Spinal Cord Injury Service, Hampstead Rehabilitation Centre, Northfield, South Australia, Australia|Victorian Spinal Cord Injury S…		https://ClinicalTrials.gov/show/NCT01086930
NCT01208688	FES Therapy:Restoring Voluntary Grasping Function in Chronic SCI		Completed	No Results Available	Spinal Cord Injuries	Device: FES Therapy|Other: Conventional Occupational Therapy	REL Hand Function Test|GRASSPGraded Redefined Assessment of Strength Sensibility and Prehension|Functional Independence Measures (FIM)|Spinal Cord Independence Measure (SCIM)|Client perception of treatment	Toronto Rehabilitation Institute|Rick Hansen Foundation	All	18 Years and older ¬† (Adult, Older Adult)	Phase 2	15	Other	Interventional	Allocation: Randomized|Intervention Model: Parallel Assignment|Masking: None (Open Label)|Primary Purpose: Treatment	2009-36|SCISN-2009-36	2009-09-01	2011-09-01	2011-09-01	2010-09-24		2012-09-25	Toronto Rehabilitation Institute, Toronto, Ontario, Canada		https://ClinicalTrials.gov/show/NCT01208688
NCT00947232	Motivational Interviewing to Increase Physical Activity to Treat Depression in People Aging With MS or SCI	inMotion	Completed	No Results Available	Multiple Sclerosis|Spinal Cord Injury	Behavioral: Motivational interviewing|Behavioral: Education	HAM-D|International Physical Activity Questionnaire	University of Washington	All	45 Years and older ¬† (Adult, Older Adult)	Not Applicable	123	Other	Interventional	Allocation: Randomized|Intervention Model: Parallel Assignment|Masking: Single (Outcomes Assessor)|Primary Purpose: Treatment	36020-J|H133B080024	2009-10-01	2012-12-01	2013-03-01	2009-07-28		2017-05-05	University of Washington, Seattle, Washington, United States		https://ClinicalTrials.gov/show/NCT00947232
NCT01067391	Effect of Tadalafil (Cialis) on the Cardiovascular System of Spinal Cord Injury (SCI) Males		Completed	No Results Available	Hypotension|Spinal Cord Injury	Drug: tadalafil|Drug: placebo	Supine and sitting blood pressure and heart rate (HR), as well as perceived dizziness upon sitting up.	University of Manitoba|Manitoba Medical Service Foundation|Rick Hansen Foundation	Male	18 Years to 70 Years ¬† (Adult, Older Adult)	Phase 4	20	Other	Interventional	Allocation: Randomized|Intervention Model: Crossover Assignment|Masking: Quadruple (Participant, Care Provider, Investigator, Outcomes Assessor)|Primary Purpose: Treatment	Cialis 2009	2009-10-01	2015-07-01	2015-07-01	2010-02-11		2015-07-17	Health Sciences Centre Rehabilitation Hospital, Winnipeg, Manitoba, Canada		https://ClinicalTrials.gov/show/NCT01067391
NCT02149186	Interactive Motor Imagery in Virtual Reality		Completed	No Results Available	Spinal Cord Injury|Stroke	Device: iCTuS-L	Sensorimotor Assessment	University of Zurich	All	16 Years to 80 Years ¬† (Child, Adult, Older Adult)	Not Applicable	79	Other	Interventional	Allocation: N/A|Intervention Model: Single Group Assignment|Masking: None (Open Label)|Primary Purpose: Basic Science	EK-24 2009/PB_2016-00545	2009-10-01	2019-12-01	2019-12-01	2014-05-29		2020-01-07	Curt, Armin, MD, Zurich, Switzerland		https://ClinicalTrials.gov/show/NCT02149186
NCT01241630	Somato-sensory Reflex Arch in Spinal Cord Injury - Effect on Clinical Outcome		Completed	No Results Available	Spinal Cord Injury	Procedure: Somatosensory reflex arch (Xiao Procedure)	Urodynamic function and bladder symptoms before and after somato-autonomic reflex arch in spinal cord injury patients|Colorectal symptoms before and after somato-autonomic reflex arch in spinal cord injury patients|Colorectal transit times and rectal wall properties after somato-autonomic reflex arch in spinal cord injury patient|Effect of quality of Life after somato-autonomic reflex arch in spi…	University of Aarhus|Lundbeck Foundation	All	18 Years and older ¬† (Adult, Older Adult)	Not Applicable	10	Other	Interventional	Allocation: N/A|Intervention Model: Single Group Assignment|Masking: None (Open Label)|Primary Purpose: Treatment	M-20090113 - 2	2009-11-01	2013-09-01	2013-09-01	2010-11-16		2014-05-12	Aarhus University Hospital, Aarhus, Denmark		https://ClinicalTrials.gov/show/NCT01241630
NCT01012635	Chronic Pain and Brain Activity in Spinal Cord Injury		Completed	No Results Available	Spinal Cord Injury	Other: Hypnosis|Other: Meditation|Other: Neurofeedback training|Other: Two different levels of tDCS	Current pain intensity after each study procedure will be the primary outcome measure. This pain intensity will be assessed using a 0 - 10 Numerical Rating Scale during the EEG (electroencephalogram) assessment after each intervention.|Study procedures will result in changes in the EEG (electroencephalogram) assessment.|The observed changes in EEG (electroencephalogram) bandwidth activity associa…	University of Washington|Eunice Kennedy Shriver National Institute of Child Health and Human Development (NICHD)	All	18 Years to 85 Years ¬† (Adult, Older Adult)		36	Other|NIH	Observational	Observational Model: Cohort|Time Perspective: Prospective	36127-B|1R21HD058049-01A2	2009-12-01	2011-12-01	2011-12-01	2009-11-13		2013-01-16	University of Washington, Seattle, Washington, United States		https://ClinicalTrials.gov/show/NCT01012635
NCT01059370	Autonomic Dysreflexia in Spinal Cord Injury		Completed	No Results Available	Autonomic Dysfunction|Spinal Cord Injured	Procedure: bowel emptying	Intervention induces 25 % raise in BP compared to baseline measurements.	University of Aarhus	All	18 Years and older ¬† (Adult, Older Adult)	Not Applicable	12	Other	Interventional	Allocation: Randomized|Intervention Model: Single Group Assignment|Masking: Single (Participant)|Primary Purpose: Prevention	2009-0112	2009-12-01	2011-11-01	2012-03-01	2010-01-29		2012-10-16	Aarhus University Hospital, Aarhus, Denmark		https://ClinicalTrials.gov/show/NCT01059370
NCT01046786	Safety and Feasibility of Umbilical Cord Blood Cell Transplant Into Injured Spinal Cord		Completed	No Results Available	Spinal Cord Injuries	Biological: Umbilical Cord Blood Mononuclear Cell|Drug: Methylprednisolone|Drug: Lithium	ASIA motor scores and sensory scores|ASIA Impairment Scale grade|MRI and Diffusion Tensor Imaging of spinal cord|Spinal Cord Independence Measure (SCIM) score|Walking Index of Spinal Cord Injury (WISCI) level|Modified Ashworth Scale (MAS) of Spasticity|Visual Analog Scale (VAS) of pain	China Spinal Cord Injury Network|Chinese University of Hong Kong|The University of Hong Kong	All	18 Years to 60 Years ¬† (Adult)	Phase 1|Phase 2	8	Other	Interventional	Allocation: Non-Randomized|Intervention Model: Parallel Assignment|Masking: None (Open Label)|Primary Purpose: Treatment	CN102B	2010-01-01	2013-10-01	2013-12-01	2010-01-12		2014-01-28	Queen Mary Hospital, Hong Kong, Hong Kong|Prince of Wales Hospital, Shatin, Hong Kong		https://ClinicalTrials.gov/show/NCT01046786
NCT01943201	Low Friction Bed Sheet		Completed	No Results Available	Spinal Cord Injury|Pressure Ulcer	Device: new bedsheet|Device: conventional bedsheet	well-being|Skin redness|Skin perfusion|Skin hydration|Skin elasticity	Swiss Paraplegic Centre Nottwil|Swiss Federal Laboratories for Material Sciences and Technology	All	18 Years to 65 Years ¬† (Adult, Older Adult)	Not Applicable	20	Other	Interventional	Allocation: Randomized|Intervention Model: Crossover Assignment|Masking: Single (Participant)|Primary Purpose: Diagnostic	2010-04	2010-01-01	2012-12-01	2012-12-01	2013-09-16		2016-11-22	Swiss Paraplegic-Centre, Nottwil, Lucerne, Switzerland		https://ClinicalTrials.gov/show/NCT01943201
NCT02122276	Effects of Continuous Passive Motion on the Spinal Circuitries and Its Adaptation in Patients With Spasticity Resulting From Upper Motor Neuron Lesions		Completed	No Results Available	Spinal Cord Injury(SCI)	Procedure: Ankle continuous passive motion machine.	The contractile properties of the muscles|Fatigue index|Clinical muscle tone tests|Patient Reported Impact of Spasticity Measure (PRISM)|The potential adverse effects of ankle swelling	Chang Gung University	All	20 Years and older ¬† (Adult, Older Adult)	Not Applicable	7	Other	Interventional	Allocation: N/A|Intervention Model: Single Group Assignment|Masking: None (Open Label)|Primary Purpose: Treatment	96-1434B	2010-01-01	2012-01-01	2012-01-01	2014-04-24		2014-04-24	Chang Gung University, Taoyuan, Taiwan		https://ClinicalTrials.gov/show/NCT02122276
NCT01147185	Effectiveness of Automated Locomotor Training in Patients With Acute Incomplete Spinal Cord Injury: A Multicenter Trial		Completed	No Results Available	Spinal Cord Injuries	Device: Locomotor training using a robotic device	Ten meter walking test|Walking Index for Spinal Cord Injury (WISCI)|Spasticity|Perceived exertion|Spinal Cord Independence Measure|Spinal cord injury classification|Patients' Global Impression of Change Scale	University of Zurich	All	18 Years to 65 Years ¬† (Adult, Older Adult)	Not Applicable	21	Other	Interventional	Allocation: Randomized|Intervention Model: Parallel Assignment|Masking: Single (Investigator)|Primary Purpose: Treatment	EMSCI-DR	2010-02-01	2016-06-01	2016-06-01	2010-06-22		2016-06-29	Berufsgenossenschaftliche Unfallklinik Murnau, Murnau, Germany|Institut Guttmann, Barcelona, Spain|Hospital Nacional de Parapl√©jicos, Toledo, Spain|Balgrist University Hospital, Zurich, Switzerland		https://ClinicalTrials.gov/show/NCT01147185
NCT04418050	Prosthetic Arthroplasties in Weight-bearing Shoulders		Completed	No Results Available	Prosthetic Arthroplasties	Procedure: Shoulder arthroplasty	Evolution of joint mobility|number of searches for early implant loosening	University Hospital, Montpellier	All	18 Years and older ¬† (Adult, Older Adult)		11	Other	Observational	Observational Model: Cohort|Time Perspective: Retrospective	RECHMPL20_0200	2010-02-01	2010-02-01	2016-09-01	2020-06-05		2020-06-05	Uhmontpellier, Montpellier, France		https://ClinicalTrials.gov/show/NCT04418050
NCT00876889	Safety of Riluzole in Patients With Acute Spinal Cord Injury		Completed	No Results Available	Spinal Cord Injury	Drug: Riluzole	American Spinal Injury Association Impairment Scale	The Methodist Hospital Research Institute|Christopher Reeve Paralysis Foundation|United States Department of Defense|AO Clinical Investigation and Publishing Documentation|Ontario Neurotrauma Foundation	All	18 Years to 70 Years ¬† (Adult, Older Adult)		36	Other|U.S. Fed	Observational	Observational Model: Other|Time Perspective: Prospective	Pro00002029|W81XWH-07-0042	2010-04-01	2011-06-01	2012-04-01	2009-04-07		2017-09-12	University of Miami, Miami, Florida, United States|University of Louisville Health Sciences Center, Louisville, Kentucky, United States|University of Maryland Medical Center, Baltimore, Maryland, United States|Thomas Jefferson University, Philadelphia, Pennsylvania, United States|The Methodist Hospital, Houston, Texas, United States|The University of Texas, Houston, Texas, United States|Universit…		https://ClinicalTrials.gov/show/NCT00876889
NCT02268266	ERIGO¬Æ Life- Control of Cardiovascular Parameters Via Verticalization and Simultaneous Mobilization	ERIGO¬ÆLIFE	Completed	No Results Available	Stroke|Spinal Cord Injury	Device: Erigo	Number of participants with adverse event as a measure of safety and tolerability	Swiss Federal Institute of Technology|Zuercher Hoehenklinik Wald|Hocoma AG, Switzerland	All	18 Years and older ¬† (Adult, Older Adult)	Not Applicable	30	Other	Interventional	Allocation: N/A|Intervention Model: Single Group Assignment|Masking: None (Open Label)|Primary Purpose: Treatment	ERIGO LIFE StV 22_2009	2010-04-01	2015-03-01	2015-03-01	2014-10-20		2015-11-18	Z√ºrcher H√∂henklinik Wald, Wald, Zurich, Switzerland|ETH Zurich, Zurich, Switzerland		https://ClinicalTrials.gov/show/NCT02268266
NCT01244594	The Effects of Two Functional Electrical Stimulation Cycling Paradigms		Completed	No Results Available	Spinal Cord Injury	Other: Cycling with functional electrical stimulation	Bone density and bone microarchitecture|Muscle volume|Muscle strength|Bone markers|Fat free soft tissue	Thomas Jefferson University|The Craig H. Neilsen Foundation|Magee Rehabilitation Hospital|Temple University|University of Delaware	All	18 Years to 65 Years ¬† (Adult, Older Adult)	Phase 2|Phase 3	17	Other	Interventional	Allocation: Randomized|Intervention Model: Parallel Assignment|Masking: None (Open Label)|Primary Purpose: Treatment	164600	2010-07-01	2013-10-01	2013-10-01	2010-11-19		2014-01-08	Magee Rehabilitation Hospital, Philadelphia, Pennsylvania, United States|Thomas Jefferson University Hospital, Philadelphia, Pennsylvania, United States|Thomas Jefferson University, Philadelphia, Pennsylvania, United States		https://ClinicalTrials.gov/show/NCT01244594
NCT01325103	Autologous Bone Marrow Stem Cell Transplantation in Patients With Spinal Cord Injury		Completed	No Results Available	Spinal Cord Injury	Procedure: Stem Cell Transplantation	Feasibility and safety of bone marrow stem cell transplantation in patients with spinal cord injury|Functional improvement in muscle strength|Improvement of sphincters control.	Hospital Sao Rafael|Oswaldo Cruz Foundation|Irep Sociedade de Ensino Superior M√©dio e Fundamental Limitada|Hospital Espanhol	All	18 Years to 50 Years ¬† (Adult)	Not Applicable	14	Other	Interventional	Allocation: N/A|Intervention Model: Single Group Assignment|Masking: None (Open Label)|Primary Purpose: Treatment	SCI-001	2010-07-01	2012-12-01	2012-12-01	2011-03-29		2017-11-28	Hospital S√£o Rafael, Salvador, Bahia, Brazil		https://ClinicalTrials.gov/show/NCT01325103
NCT00977041	Neurofeedback Treatment of Pain in Persons With Spinal Cord Injury (SCI)		Completed	No Results Available	Spinal Cord Injuries|Pain	Behavioral: Neurofeedback	Average daily (past 24 hours) pain will be the primary outcome measure for the clinical phase of this study. This will be assessed using a 0-10 NRS via four phone interviews performed on different days by a research assistant.|Brain wave activity will be assessed in all of second phase participants with the use of an electroencephalogram(EEG).|Sleep quality will be assessed using the six-item Med…	University of Washington|The Craig H. Neilsen Foundation	All	18 Years to 85 Years ¬† (Adult, Older Adult)	Phase 2	13	Other	Interventional	Allocation: N/A|Intervention Model: Single Group Assignment|Masking: None (Open Label)|Primary Purpose: Treatment	36292-D Phase 2|124155	2010-08-01	2011-10-01	2011-10-01	2009-09-15		2013-06-06	University of Washington, Seattle, Washington, United States		https://ClinicalTrials.gov/show/NCT00977041
NCT01184365	Spinal Cord Injury Energy Management Program		Completed	No Results Available	Spinal Cord Injury	Behavioral: Energy Management Program	To test a behavioural (not pharmaceutical or surgical) intervention for fatigue in SCI|Evaluates self-efficacy and is the Self-Efficacy for Performing Energy Conservation Strategies Assessment (SEPECSA)	University of British Columbia|Canadian Institutes of Health Research (CIHR)	All	19 Years to 65 Years ¬† (Adult, Older Adult)	Phase 2|Phase 3	28	Other	Interventional	Allocation: Randomized|Intervention Model: Parallel Assignment|Masking: Single (Participant)|Primary Purpose: Treatment	H10-01037|NSP-104021	2010-08-01	2012-06-01	2012-06-01	2010-08-18		2014-03-17	Blusson Spinal Cord Centre, Vancouver, British Columbia, Canada		https://ClinicalTrials.gov/show/NCT01184365
NCT01652352	Experimental Evaluation of Wheelchair-Mounted Robotic Arms	HRI	Completed	No Results Available	Spinal Cord Injury|Cerebral Palsy|Multiple Sclerosis		Efficacy - Ease of Use|Time of Completion	University of South Florida|U.S. National Science Foundation	All	18 Years to 60 Years ¬† (Adult)		20	Other|U.S. Fed	Observational	Observational Model: Case-Control	105880|0713560	2010-08-01	2011-07-01	2011-07-01	2012-07-30		2012-07-30	Rehabilitation Robotics and Prosthetics Testbed, Tampa, Florida, United States		https://ClinicalTrials.gov/show/NCT01652352
NCT02850133	Aerobic Exercise and Blood Biochemical Factors in Spinal Cord Injury		Completed	No Results Available	Spinal Cord Injury	Other: aerobic exercise training	serum myokines	National Taiwan University Hospital|National Science Council, Taiwan	Male	20 Years and older ¬† (Adult, Older Adult)	Not Applicable	32	Other	Interventional	Allocation: N/A|Intervention Model: Single Group Assignment|Masking: None (Open Label)|Primary Purpose: Basic Science	201007031R	2010-08-01	2013-07-01	2013-07-01	2016-07-29		2016-07-29			https://ClinicalTrials.gov/show/NCT02850133
NCT01274312	Somato-sensory Reflex Arch in Spinal Cord Injury - Effect on Colorectal Transport		Completed	No Results Available	Spinal Cord Injuries	Procedure: Xiao procedure	Colorectal emptying|Colorectal transport during somato-autonomic reflex stimulation|Colorectal transport at defecation	University of Aarhus|Lundbeck Foundation	All	18 Years and older ¬† (Adult, Older Adult)	Not Applicable	10	Other	Interventional	Allocation: N/A|Intervention Model: Single Group Assignment|Masking: None (Open Label)|Primary Purpose: Treatment	M-20090113 - 1	2010-09-01	2013-09-01	2013-09-01	2011-01-11		2014-05-12	Aarhus University Hospital, Aarhus, Denmark		https://ClinicalTrials.gov/show/NCT01274312
NCT01467817	Obesity/Overweight in Persons With Early and Chronic Spinal Cord Injury (SCI)		Completed	No Results Available	Overweight|Obese|Spinal Cord Injury	Behavioral: Lifestyle Intervention|Behavioral: Exercise Control	Body mass	University of Miami	All	18 Years to 65 Years ¬† (Adult, Older Adult)	Not Applicable	29	Other	Interventional	Allocation: Randomized|Intervention Model: Single Group Assignment|Masking: None (Open Label)|Primary Purpose: Health Services Research	TMP-MN-009	2010-09-01	2016-09-01	2016-09-01	2011-11-09		2016-11-30	University Of Miami, Miami, Florida, United States		https://ClinicalTrials.gov/show/NCT01467817
NCT01217008	Safety Study of GRNOPC1 in Spinal Cord Injury		Completed	No Results Available	Spinal Cord Injury	Biological: GRNOPC1	Safety|Neurological function	Lineage Cell Therapeutics, Inc.	All	18 Years to 65 Years ¬† (Adult, Older Adult)	Phase 1	5	Industry	Interventional	Allocation: Non-Randomized|Intervention Model: Single Group Assignment|Masking: None (Open Label)|Primary Purpose: Treatment	CP35A007	2010-10-01	2013-07-01	2013-07-01	2010-10-08		2020-06-18	University of Alabama at Birmingham, Birmingham, Alabama, United States|Stanford University/Santa Clara Valley Medical Center, Palo Alto/San Jose, California, United States|Shepherd Center, Atlanta, Georgia, United States|Northwestern University, Chicago, Illinois, United States|University of Maryland Medical Center/Kernan Orthopaedics and Rehabilitation Hospital, Baltimore, Maryland, United Stat…		https://ClinicalTrials.gov/show/NCT01217008
NCT01232907	The Effects of L-carnitine on Fatigue in Spinal Cord Injury		Completed	No Results Available	Spinal Cord Injury (SCI)	Drug: L-Carnitine	Fatigue Severity Scores (FSS) will be completed by subjects biweekly|Fatigue VAS-F will be completed by subjects biweekly|Pain VAS-P will be completed by subjects biweekly|Depression CES-D will be completed by subjects biweekly	University of British Columbia|Canadian Institutes of Health Research (CIHR)	All	19 Years to 65 Years ¬† (Adult, Older Adult)	Phase 2	2	Other	Interventional	Allocation: Randomized|Intervention Model: Single Group Assignment|Masking: None (Open Label)|Primary Purpose: Treatment	H10-01570	2010-10-01	2013-04-01	2013-04-01	2010-11-02		2014-10-08	Rehab Research Lab, GF Strong Rehab Centre, 4255 Laurel Street, Vancouver, British Columbia, Canada		https://ClinicalTrials.gov/show/NCT01232907
NCT02110290	Effects of an Adapted Ski/Snowboarding Program on Quality of Life in Children With Physical Disabilities		Completed	No Results Available	Cerebral Palsy|Traumatic Brain Injuries|Spinal Cord Injuries|Physical Disability		Physical Wellbeing|Psychological Wellbeing|Moods and Emotions|Self Perception|Autonomy|Parents|Financial|Peers|School|Bullying	University of Colorado, Denver	All	8 Years to 18 Years ¬† (Child, Adult)		86	Other	Observational	Observational Model: Case-Only|Time Perspective: Prospective	10-1111	2010-10-01	2016-08-01	2016-08-01	2014-04-10		2019-10-31	Children's Hospital Colorado, Aurora, Colorado, United States		https://ClinicalTrials.gov/show/NCT02110290
NCT01243125	Study to Evaluate NVC-422 for Urinary Catheter Blockage and Encrustation		Completed	No Results Available	Urinary Catheter Blockage and Encrustation	Drug: NVC-422, 0.2%|Drug: Sterile normal saline, 0.9%	Catheter patency following treatment|Incidence of catheter blockage requiring early removal|Assessment of biofilm of catheter|Assessment of encrustation of catheter	NovaBay Pharmaceuticals, Inc.	All	18 Years and older ¬† (Adult, Older Adult)	Phase 2	67	Industry	Interventional	Allocation: Randomized|Intervention Model: Crossover Assignment|Masking: Quadruple (Participant, Care Provider, Investigator, Outcomes Assessor)|Primary Purpose: Prevention	CL1001	2010-11-01	2013-07-01	2013-08-01	2010-11-18		2014-08-07	Los Amigos Research and Education Institute (LAREI), Downey, California, United States|Specialists in Urology, Naples, Florida, United States|Kessler Institute for Rehabilitation, West Orange, New Jersey, United States|Carolinas Medical Center, Charlotte, North Carolina, United States|Thomas Jefferson University, Philadelphia, Pennsylvania, United States|Carolina Urologic Research Center, Myrtle …		https://ClinicalTrials.gov/show/NCT01243125
NCT01311375	Omega 3 in Intervention Spinal Cord Injured People		Completed	No Results Available	Lipid Metabolism Disorders|Peroxidase; Defect	Dietary Supplement: w3 supplement in SCI|Other: placebo	Neurological recovery,metabolic profile and Antioxidant profile evaluation|Neurological recovery,metabolic profile and Antioxidant profile evaluation in SCI patients|Neurological recovery,metabolic profile and Antioxidant profile evaluation in patients with SCI	Tehran University of Medical Sciences	All	18 Years and older ¬† (Adult, Older Adult)	Phase 2|Phase 3	100	Other	Interventional	Allocation: Randomized|Intervention Model: Parallel Assignment|Masking: Triple (Participant, Care Provider, Investigator)|Primary Purpose: Supportive Care	87-03-85-7538	2010-11-01	2012-04-01	2012-04-01	2011-03-09		2012-11-14	Brain and Spinal Injury Repair Research Center, Tehran, Iran, Islamic Republic of		https://ClinicalTrials.gov/show/NCT01311375
NCT01236976	SCIPA Full-On :Intensive Exercise Program After Spinal Cord Injury	SCIPAFull-On	Completed	No Results Available	Spinal Cord Injury	Device: Therastride Treadmill System|Device: FES-assisted cycling|Other: Trunk and upper and lower limb exercises|Other: Upper body strength and fitness program	To determine the relative effectiveness of a comprehensive exercise program compared to a generic upper body strength and fitness training program on neurological improvement.	University of Melbourne|Austin Health|Hampstead Rehabilitation Centre Adelaide|Shenton Park Rehabilitation Centre Perth|Royal Rehabilitation Centre Sydney|Prince of Wales Hospital, Sydney|Burwood Hospital, Christchurch, New Zealand	All	18 Years and older ¬† (Adult, Older Adult)	Phase 3	116	Other	Interventional	Allocation: Randomized|Intervention Model: Parallel Assignment|Masking: Single (Outcomes Assessor)|Primary Purpose: Treatment	SCIPA Full-On	2010-12-01	2012-12-01	2016-06-01	2010-11-09		2021-05-03	Spinal Unit, Prince of Wales Hospital, Randwick, New South Wales, Australia|Royal Rehabilitation Centre Sydney, Sydney, New South Wales, Australia|South Australian Spinal Cord Injury Service, Hampstead Rehabilitation Centre, Northfield, South Australia, Australia|Victorian Spinal Cord Injury Service, Royal Talbot Rehabilitation Centre, Kew, Victoria, Australia|Sir George Bebrook Spinal Injuries C…		https://ClinicalTrials.gov/show/NCT01236976
NCT01272336	Study Effects of Intermittent Hypoxia on Restoring Hand Function Following SCI		Completed	No Results Available	Spinal Cord Injury	Drug: Acute Intermittent Hypoxia (AIH)|Other: SHAM-Intermittent Room Air	Hand grasp|Grip strength	Emory University|University of Saskatchewan|University of Wisconsin, Madison	All	18 Years to 65 Years ¬† (Adult, Older Adult)	Phase 1	53	Other	Interventional	Allocation: Randomized|Intervention Model: Crossover Assignment|Masking: Triple (Participant, Investigator, Outcomes Assessor)|Primary Purpose: Treatment	IRB00035986|163907	2010-12-01	2013-08-01	2015-10-01	2011-01-07		2016-01-26	Emory Center for Rehabilitation Medicine, Atlanta, Georgia, United States		https://ClinicalTrials.gov/show/NCT01272336
NCT01272349	Intermittent Hypoxia Elicits Prolonged Restoration of Motor Function in Human SCI		Completed	No Results Available	Spinal Cord Injury	Other: Acute intermittent hypoxia|Other: Room air	Walking performance	Emory University|Shirley Ryan AbilityLab|Shepherd Center, Atlanta GA|Northwestern University|University of Wisconsin, Madison|University of Saskatchewan	All	18 Years to 65 Years ¬† (Adult, Older Adult)	Phase 1	19	Other	Interventional	Allocation: Randomized|Intervention Model: Crossover Assignment|Masking: Quadruple (Participant, Care Provider, Investigator, Outcomes Assessor)|Primary Purpose: Treatment	IRB00035986a|W81XWH-10-1-0832	2010-12-01	2013-11-01	2013-11-01	2011-01-07		2013-11-21	Shepherd Center, Atlanta, Georgia, United States|Rehabilitation Institute of Chicago, Chicago, Illinois, United States		https://ClinicalTrials.gov/show/NCT01272349
NCT02711319	Non-invasive Brain Stimulation for Gait Improvement in Patients With Spinal Cord Injury	SCI	Completed	No Results Available	Functional Improvement	Device: rTMS|Device: sham rTMS	ten-meters walking test (10MWT=Time in seconds to walk 10 meters.)|Modified Ashworth Scale (MAS)|--Total motor score from upper (UEMS) and lower extremities (LEMS)|Walking Index for SCI (WISCI) II	Institut Guttmann|Instituto de Salud Carlos III	All	18 Years to 70 Years ¬† (Adult, Older Adult)	Phase 3	31	Other	Interventional	Allocation: Randomized|Intervention Model: Parallel Assignment|Masking: Double (Participant, Outcomes Assessor)|Primary Purpose: Treatment	PI10/00442	2010-12-01	2015-06-01	2015-08-01	2016-03-17		2016-03-17			https://ClinicalTrials.gov/show/NCT02711319
NCT01256554	Single Session Spine Stereotactic Radiosurgery in Metastatic Epidural Spinal Cord Compression		Completed	No Results Available	Metastatic Epidural Spinal Cord Compression	Procedure: Stereotactic Radiosurgery (SSRS)|Behavioral: Questionnaires	Number of Occurrences of Paralysis Caused by Radiation Myelitis (RM)	M.D. Anderson Cancer Center	All	18 Years and older ¬† (Adult, Older Adult)	Phase 1	11	Other	Interventional	Allocation: N/A|Intervention Model: Single Group Assignment|Masking: None (Open Label)|Primary Purpose: Treatment	2010-0653|NCI-2011-00273	2010-12-03	2021-10-15	2021-10-15	2010-12-08		2021-10-25	University of Texas MD Anderson Cancer Center, Houston, Texas, United States		https://ClinicalTrials.gov/show/NCT01256554
NCT04483570	Urological Deterioration in Secondary Tethered Cord Syndrome and Clue to Detect It		Completed	No Results Available	Neurogenic Bladder|Tethered Spinal Cord Syndrome	Procedure: Redo-tethering operation	Pre-operative evaluation: Dysfunctional voiding|Pre-operative evaluation: Presence of Urinary Tract Infection (UTI)|VUD (Video Urodynamic Studies)	Seoul National University Hospital	All	3 Months to 23 Years ¬† (Child, Adult)		54	Other	Observational	Observational Model: Cohort|Time Perspective: Retrospective	H-1809-029-969	2011-01-01	2018-11-01	2018-12-01	2020-07-23		2020-07-23			https://ClinicalTrials.gov/show/NCT04483570
NCT02200393	Abdominal Functional Electrical Stimulation (AFES) to Assist Ventilator Weaning in Tetraplegia		Completed	No Results Available	Spinal Cord Injury|Tetraplegia	Device: Abdominal FES	Time to wean from mechanical ventilation|Unassisted breathing vital capacity|AFES assisted breathing tidal volume|AFES assisted breathing vital capacity|Unassisted breathing tidal volume	University of Glasgow|NHS Greater Glasgow and Clyde	All	16 Years and older ¬† (Child, Adult, Older Adult)	Not Applicable	10	Other	Interventional	Allocation: N/A|Intervention Model: Single Group Assignment|Masking: None (Open Label)|Primary Purpose: Treatment	GN11NE458	2011-02-01	2013-12-01	2013-12-01	2014-07-25		2014-07-25	Queen Elizabeth National Spinal Injuries Unit, Glasgow, United Kingdom		https://ClinicalTrials.gov/show/NCT02200393
NCT02260713	Autologous Bone Marrow Cell Transplantation in Persons With Acute Spinal Cord Injury- An Indian Pilot Study.		Completed	No Results Available	Acute Spinal Cord Injury	Biological: autologous bone marrow cell	Examine for improvement in the ASIA classification.|Any voluntary movement by additional muscle groups not included in International Standards for Neurological Classification of Spinal Cord Injury|Improvement by at least 1 point on the WISCI scale|Decrease in spasticity by one grade or more as assessed by Modified Ashworth Spasticity Scale|Improvement in ASIA sensory examination|Improvements in S…	Indian Spinal Injuries Centre|Indian Council of Medical Research	All	18 Years to 50 Years ¬† (Adult)	Phase 1|Phase 2	21	Other	Interventional	Allocation: Randomized|Intervention Model: Parallel Assignment|Masking: Single (Outcomes Assessor)|Primary Purpose: Treatment	ISIC-BMC	2011-02-01	2017-11-01	2017-11-01	2014-10-09		2018-03-12	Indian Spinal Injury Center, New Delhi, Delhi, India		https://ClinicalTrials.gov/show/NCT02260713
NCT01321333	Study of Human Central Nervous System Stem Cells (HuCNS-SC) in Patients With Thoracic Spinal Cord Injury		Completed	No Results Available	Thoracic Spinal Cord Injury|Spinal Cord Injury|Spinal Cord Injury Thoracic|Spinal Cord Trauma	Biological: HuCNS-SC cells	Types and frequencies of adverse events and serious adverse events	StemCells, Inc.	All	18 Years to 60 Years ¬† (Adult)	Phase 1|Phase 2	12	Industry	Interventional	Allocation: N/A|Intervention Model: Single Group Assignment|Masking: None (Open Label)|Primary Purpose: Treatment	CL-N02-SC	2011-03-01	2015-04-01	2015-04-01	2011-03-23		2015-06-18	Foothills Medical Center, Calgary, Alberta, Canada|Toronto Western Hospital, Toronto, Ontario, Canada|University Hospital Balgrist- Uniklinik Balgrist, Forschstrasse 340, Zurich, Switzerland		https://ClinicalTrials.gov/show/NCT01321333
NCT01932905	Deep rTMS in Central Neuropathic Pain Syndromes	DRTMS	Completed	No Results Available	Pain|Spinal Cord Injury|Post Stroke Pain	Device: deep rTMS	Change in baseline of Pain	University of Sao Paulo	All	18 Years and older ¬† (Adult, Older Adult)	Not Applicable	120	Other	Interventional	Allocation: Randomized|Intervention Model: Parallel Assignment|Masking: Double (Participant, Outcomes Assessor)|Primary Purpose: Treatment	RGDCA-02	2011-03-01	2013-12-01	2015-08-01	2013-08-30		2017-05-10	Hospital das Cl√≠nicas da Faculdade de Medicina da Universidade de S√£o Paulo (HC/FMUSP), S√£o Paulo, SP, Brazil		https://ClinicalTrials.gov/show/NCT01932905
NCT01349478	The Effects of Passive Gait Training in Complete Motor Spinal Cord Injury (SCI)		Completed	No Results Available	Motor Complete Spinal Cord Injury	Device: LOKOMAT	Electrical stimulation induced lower limb exercise capacity in individuals with SCI|Reduction of risk factors for CVD	Dr. Gabriel Zeilig|Sheba Medical Center	All	18 Years to 55 Years ¬† (Adult)	Phase 1|Phase 2	11	Other	Interventional	Allocation: N/A|Intervention Model: Single Group Assignment|Masking: None (Open Label)|Primary Purpose: Supportive Care	SHEBA-11-8422-GZ-CTIL	2011-05-01	2016-05-01	2016-05-01	2011-05-06		2016-12-28	Sheba medical center, Tel Hashomer, Israel		https://ClinicalTrials.gov/show/NCT01349478
NCT01354158	A Dose Titration of Droxidopa in Patients With Spinal Cord Injury		Completed	No Results Available	Spinal Cord Injury|Hypotension	Drug: Droxidopa	The lowest dose of droxidopa that increases seated SBP to 115¬±5 mmHg in men and 105¬±5 mmHg in women|The MFV response to droxidopa administration in hypotensive individuals with SCI|To assess the vasoactive hormone and catecholamine response to droxidopa administration in hypotensive individuals with SCI	Bronx VA Medical Center|Chelsea Therapeutics	All	18 Years to 65 Years ¬† (Adult, Older Adult)	Phase 1	11	U.S. Fed|Industry	Interventional	Allocation: Non-Randomized|Intervention Model: Single Group Assignment|Masking: None (Open Label)|Primary Purpose: Treatment	1272	2011-05-01	2013-05-01	2013-05-01	2011-05-16		2013-07-30	James J. Peters VA Medical Center, Bronx, New York, United States		https://ClinicalTrials.gov/show/NCT01354158
NCT01355549	Platelet-Rich Plasma Therapy for Shoulder Pain in Persons With Spinal Cord Injury		Completed	No Results Available	Shoulder Pain|Rotator Cuff Tendinitis|Rotator Cuff Syndrome|Spinal Cord Injury	Biological: Platelet-rich plasma (PRP) therapy	Numerical Rating Scale (NRS)|Wheelchair User's Shoulder Pain Index (WUSPI)|Patient Global Impression of Change|Brief Pain Inventory interference items (BPI-I)|Rotator Cuff Disease Score	Kessler Foundation	All	18 Years to 60 Years ¬† (Adult)	Phase 1	6	Other	Interventional	Allocation: N/A|Intervention Model: Single Group Assignment|Masking: None (Open Label)|Primary Purpose: Treatment	R-677-10	2011-05-01	2012-11-01	2012-11-01	2011-05-18		2013-01-15	Kessler Institute for Rehabilitation, West Orange, New Jersey, United States		https://ClinicalTrials.gov/show/NCT01355549
NCT01385384	Diaphragmatic Pacemaker in Tetraplegic Patients With Spinal Cord Injuries		Completed	No Results Available	Respiratory Paralysis|Diaphragmatic Paralysis|Spinal Cord Injury	Device: NeuRx RA/4 diaphragmatic pacemaker	Volume comparison of the basal with the tidal volume obtained with the NeuRx RA/4 pacemaker in patients with diaphragmatic paralysis|Functional rehabilitation by measure of total usage time, both day and night	University of Sao Paulo|Synapse Biomedical	All	18 Years and older ¬† (Adult, Older Adult)	Not Applicable	5	Other|Industry	Interventional	Allocation: Non-Randomized|Intervention Model: Single Group Assignment|Masking: None (Open Label)|Primary Purpose: Treatment	NeuRx-055110	2011-06-01	2012-11-01	2012-12-01	2011-06-30		2013-03-19	Heart Institute (InCor) Hospital das Clinicas da Faculdade de Medicina da Universidade de Sao Paulo, Sao Paulo, SP, Brazil|Hospital das Clinicas da Faculdade de Medicina da Universidade de Sao Paulo, Sao Paulo, Brazil		https://ClinicalTrials.gov/show/NCT01385384
NCT01368172	Physical Activity Guidelines for People With Spinal Cord Injury (SCI)		Completed	No Results Available	Spinal Cord Injury	Behavioral: Physical Activity Guidelines	Physical Fitness|Self-efficacy for achieving the physical activity guidelines|Adherence to physical activity guidelines	McMaster University|Rick Hansen Foundation	All	18 Years to 60 Years ¬† (Adult)	Phase 1	30	Other	Interventional	Allocation: Randomized|Intervention Model: Parallel Assignment|Masking: None (Open Label)	HicksPAGs	2011-07-01	2013-06-01	2013-06-01	2011-06-07		2014-04-08	Centre for Health Promotion and Rehabilitation, McMaster University, Hamilton, Ontario, Canada		https://ClinicalTrials.gov/show/NCT01368172
NCT04237363	Recovery of Walking in Persons With Complete Spinal Cord Injury		Completed	No Results Available	Spinal Cord Injuries	Behavioral: Exercise	Overground walking capacity	Middle Tennessee State University	All	21 Years and older ¬† (Adult, Older Adult)	Not Applicable	5	Other	Interventional	Allocation: N/A|Intervention Model: Single Group Assignment|Masking: None (Open Label)|Primary Purpose: Treatment	11-310	2011-07-05	2013-08-06	2013-08-06	2020-01-23		2020-01-23			https://ClinicalTrials.gov/show/NCT04237363
NCT01354483	Umbilical Cord Blood Mononuclear Cell Transplant to Treat Chronic Spinal Cord Injury		Completed	No Results Available	Spinal Cord Injuries	Biological: Umbilical Cord Blood Mononuclear Cell|Biological: Methylprednisolone|Drug: Lithium Carbonate Tablet	Changes from Baseline in ASIA motor and sensory scores|Spinal Cord Independence Measure (SCIM) score|Walking Index of Spinal Cord Injury (WISCI) Level|Kunming Walking Score|Modified Ashworth Scale (MAS)of spasticity|Visual Analog Scale of pain	China Spinal Cord Injury Network|Chengdu PLA General Hospital	All	18 Years to 60 Years ¬† (Adult)	Phase 1|Phase 2	20	Other	Interventional	Allocation: Randomized|Intervention Model: Factorial Assignment|Masking: None (Open Label)|Primary Purpose: Treatment	CN102B_KM	2011-09-01	2013-09-01	2013-12-01	2011-05-17		2014-08-21	Treating Center of Spinal Cord Injury, Chengdu Army Kunming General Hospital, Kunming, Yunnan, China		https://ClinicalTrials.gov/show/NCT01354483
NCT01471613	Lithium, Cord Blood Cells and the Combination in the Treatment of Acute & Sub-acute Spinal Cord Injury		Completed	No Results Available	Spinal Cord Injury	Procedure: Conventional Treatment|Drug: Lithium Carbonate Tablet|Biological: Cord Blood Cell|Other: Placebo	Change from Baseline in AIS Motor and sensory scores and ASIA Impairment Scales in 48 weeks|Walking|Functional assessment|Locomotion|Spasticity grade|Pain	China Spinal Cord Injury Network|Chengdu PLA General Hospital|StemCyte, Inc.	All	18 Years to 65 Years ¬† (Adult, Older Adult)	Phase 1|Phase 2	16	Other|Industry	Interventional	Allocation: Randomized|Intervention Model: Parallel Assignment|Masking: Quadruple (Participant, Care Provider, Investigator, Outcomes Assessor)|Primary Purpose: Treatment	CN102c	2011-09-01	2013-12-01	2014-01-01	2011-11-15		2014-01-28	Treating Center of Spinal Cord Injury, Chinese PLA Chengdu Army Kunming General Hospital, Kunming, Yunnan, China		https://ClinicalTrials.gov/show/NCT01471613
NCT02244931	Comparison of Three Different Assisting Devices to Power Manual Wheelchairs in Patients With Spinal Cord Injury	PAPAW	Completed	No Results Available	Spinal Cord Injuries	Device: Servomatic‚Ñ¢ assisting device|Device: E.Motion¬© assisting device|Device: Standard manual Wheelchair	Phase 1: physiological parameters : Oxygen consumption.|Phase 2: Ease of crossing obstacles assessed by patients with a Visual Analog Scale|Phase 3: Time necessary to transfer from wheelchair to car and from car to wheelchair.	Assistance Publique - H√¥pitaux de Paris	All	18 Years to 70 Years ¬† (Adult, Older Adult)	Not Applicable	106	Other	Interventional	Allocation: Randomized|Intervention Model: Crossover Assignment|Masking: None (Open Label)	2011-A00151-40	2011-09-01	2014-08-01	2014-08-01	2014-09-19		2014-09-19	Physical Medicine and Rehabilitation, Raymond Poincar√© Hospital, Garches, France		https://ClinicalTrials.gov/show/NCT02244931
NCT01477502	Clinical Value of Homeopathic Prophylaxis of Recurrent Urinary Tract Infections in Persons With Spinal Cord Injury		Completed	No Results Available	Symptomatic Urinary Tract Infection|Spinal Cord Injury	Other: individual homeopathic treatment|Other: standard treatment without homeopathy	number of symptomatic urinary tract infections|number of symptomatic urinary tract infections compared to the previous year	Swiss Paraplegic Centre Nottwil	All	18 Years to 90 Years ¬† (Adult, Older Adult)	Not Applicable	46	Other	Interventional	Allocation: Randomized|Intervention Model: Parallel Assignment|Masking: None (Open Label)|Primary Purpose: Prevention	2011-24|11050	2011-11-01	2016-08-01	2016-10-01	2011-11-22		2016-10-13	Swiss Paraplegic center, Nottwil, Lucerne, Switzerland		https://ClinicalTrials.gov/show/NCT01477502
NCT01539109	Improving Spinal Cord Injury Rehabilitation Interventions by Retraining the Brain With Stimulation		Completed	No Results Available	Spinal Cord Injury	Behavioral: Rehabilitation|Procedure: Noninvasive brain stimulation: tDCS|Procedure: Sham tDCS: placebo noninvasive brain stimulation	Change in Upper Limb Function from Baseline|Magnetic Resonance Imaging (MRI) of the brain|Physiology of Brain studied with Noninvasive Brain Stimulation using Transcranial Magnetic Stimulation (TMS)	The Cleveland Clinic|Telemedicine & Advanced Technology Research Center	All	18 Years to 75 Years ¬† (Adult, Older Adult)	Not Applicable	20	Other	Interventional	Allocation: Randomized|Intervention Model: Parallel Assignment|Masking: Double (Participant, Outcomes Assessor)|Primary Purpose: Treatment	16-334|RPC 2016-195	2011-11-01	2019-10-01	2019-10-01	2012-02-27		2020-07-16	The Cleveland Clinic, Cleveland, Ohio, United States		https://ClinicalTrials.gov/show/NCT01539109
NCT03146728	Finding the Optimal Voluntary Exercise Parameters for Those Living With Quadriplegia		Completed	No Results Available	Metabolism|Obesity|Spinal Cord Injury	Other: exercise	changes in energy expenditure	University of Manitoba	All	18 Years to 65 Years ¬† (Adult, Older Adult)		46	Other	Observational	Observational Model: Case-Control|Time Perspective: Cross-Sectional	H2011:323|313540	2011-11-01	2013-09-01	2014-03-01	2017-05-10		2017-05-10	University of Manitoba, Winnipeg, Manitoba, Canada		https://ClinicalTrials.gov/show/NCT03146728
NCT01485458	Optimal Treatment for Spinal Cord Injury Associated With Cervical Canal Stenosis (OSCIS) Study	OSCIS	Completed	No Results Available	Spinal Cord Injury	Procedure: Early surgery|Procedure: Delayed surgery	ASIA motor score|the ability to walk without assistance|Spinal Cord Independence Measure (SCIM)|Health-related quality of life|Neuropathic pain|Walking status	Tokyo University	All	20 Years to 79 Years ¬† (Adult, Older Adult)	Not Applicable	72	Other	Interventional	Allocation: Randomized|Intervention Model: Parallel Assignment|Masking: None (Open Label)|Primary Purpose: Treatment	OSCIS|UMIN000006780	2011-12-01	2019-12-01	2020-12-01	2011-12-05		2021-04-01	The University of Tokyo, Tokyo, Japan		https://ClinicalTrials.gov/show/NCT01485458
NCT01538693	Molecular Markers of Neuroplasticity During Exercise in People With Incomplete Spinal Cord Injury		Completed	No Results Available	Spinal Cord Injury	Drug: escitalopram oxalate|Drug: Cyproheptadine|Drug: sugar pill|Other: Graded intensity exercise	Change in blood serum concentration of neuroplastic proteins|fastest possible walking velocity overground|Six Minute Walk Distance|Volitional strength: Lower Extremity Motor Score|Modified Ashworth Scale|Spinal Cord Assessment tool for Spasticity|Measure of Community mobility|Sagittal plane kinematics of excursions of hip/knee/ankle|Peak ambulation velocity|Oxygen consumption|Heart Rate|Rating of…	T. George Hornby|University of Medicine and Dentistry of New Jersey|Shirley Ryan AbilityLab	All	18 Years to 75 Years ¬† (Adult, Older Adult)	Not Applicable	30	Other	Interventional	Allocation: Randomized|Intervention Model: Crossover Assignment|Masking: Double (Participant, Investigator)|Primary Purpose: Basic Science	STU00056144	2011-12-01	2015-05-01	2015-05-01	2012-02-24		2015-05-19	Rehabiliation Institute of Chicago, Chicago, Illinois, United States		https://ClinicalTrials.gov/show/NCT01538693
NCT01599767	Spaulding-Harvard Model System: Effects of Transcranial Direct Current Stimulation (tDCS) on Chronic Pain in Spinal Cord Injury		Completed	No Results Available	Spinal Cord Injury|Chronic Pain|Neuropathic Pain	Device: Transcranial direct current stimulation (tDCS)	Change in Pain Scale|Changes in Quality of Life Scale|Changes in Mood Scale	Spaulding Rehabilitation Hospital|U.S. Department of Education	All	18 Years and older ¬† (Adult, Older Adult)	Not Applicable	46	Other|U.S. Fed	Interventional	Allocation: Randomized|Intervention Model: Parallel Assignment|Masking: Double (Participant, Outcomes Assessor)|Primary Purpose: Treatment	2011-p-002353	2011-12-01	2016-12-01	2016-12-01	2012-05-16		2020-04-24	Spaulding Rehabilitation Hospital, Boston, Massachusetts, United States		https://ClinicalTrials.gov/show/NCT01599767
NCT01600404	Effects of Antimuscarinics on Cognition in Spinal Cord Injury		Completed	No Results Available	Mild Cognitive Impairment|Spinal Cord Injuries	Drug: antimuscarinic treatment	d2 Test|International Spinal Cord Injury Pain Basic Data Set|Beck Depression Inventory Score|patient characteristics|type of neurologic lower urinary tract dysfunction|Stroop Test|California Verbal Learning Test|Verbal Fluency Test according to Thurstone|visuospatial performance|divided attention	Swiss Paraplegic Centre Nottwil	All	18 Years to 65 Years ¬† (Adult, Older Adult)		32	Other	Observational	Observational Model: Cohort|Time Perspective: Prospective	2011-25	2011-12-01	2015-11-01	2015-11-01	2012-05-17		2015-11-17	Swiss Paraplegic Centre, Nottwil, LU, Switzerland		https://ClinicalTrials.gov/show/NCT01600404
NCT01279811	The Canadian Multicentre CSF Monitoring and Biomarker Study	CAMPER	Completed	No Results Available	Spinal Cord Injury	Other: Crossover of vasopressors	Spinal cord perfusion pressure|Levels of specific biochemical markers in the CSF|International Standards for Neurological Classification of Spinal Cord Injury (aka ASIA Examination)|DN4 and other pain questionnaires	University of British Columbia|Rick Hansen Institute	All	17 Years and older ¬† (Child, Adult, Older Adult)	Not Applicable	86	Other	Interventional	Allocation: N/A|Intervention Model: Single Group Assignment|Masking: None (Open Label)|Primary Purpose: Other	H10-01091	2012-01-01	2020-09-30	2020-09-30	2011-01-19		2020-11-04	Zuckerberg San Francisco General Hospital (UCSF), San Francisco, California, United States|Vancouver General Hospital, Vancouver, British Columbia, Canada|QEII Health Sciences Centre, Halifax, Nova Scotia, Canada|London Health Science Centre- Victoria Campus, London, Ontario, Canada|St. Michael's Hospital, Toronto, Ontario, Canada|H√¥pital du Sacr√©-Coeur, Montreal, Quebec, Canada		https://ClinicalTrials.gov/show/NCT01279811
NCT02099955	Vitamin D Deficiency and Replacement on Pulmonary and Endocrine Function in SCI		Completed	No Results Available	Spinal Cord Injury|Vitamin D Deficiency	Drug: Vitamin D3	Number of SCI participants with vitamin D deficiency|Pulmonary function improvement as measured by PFTs in SCI with increased vitamin D levels	James J. Peters Veterans Affairs Medical Center	All	18 Years to 75 Years ¬† (Adult, Older Adult)	Phase 1|Phase 2	88	U.S. Fed	Interventional	Allocation: Non-Randomized|Intervention Model: Single Group Assignment|Masking: None (Open Label)|Primary Purpose: Treatment	BAU-11-092	2012-01-01	2015-12-01	2016-12-01	2014-03-31		2017-03-07	James J Peters VA Medical Center, Bronx, New York, United States		https://ClinicalTrials.gov/show/NCT02099955
NCT03112941	Hyperbaric Oxygen and Orthopedic Comprehensive Treatment for Traumatic Incomplete Spinal Cord Injury in the Plateau		Completed	No Results Available	Spinal Cord Injuries	Procedure: control group|Other: hyperbaric oxygen group	Modified Barthel index|American Spinal Injury Association impairment scale grading	Qinghai University	All	18 Years and older ¬† (Adult, Older Adult)	Not Applicable	164	Other	Interventional	Allocation: Randomized|Intervention Model: Parallel Assignment|Masking: None (Open Label)|Primary Purpose: Treatment	QinghaiUH_JM	2012-01-01	2016-06-01	2017-12-01	2017-04-13		2018-02-09			https://ClinicalTrials.gov/show/NCT03112941
NCT01537978	Use of Interactive Gaming for Enhanced Function After Spinal Cord Injury		Completed	No Results Available	Paraplegia and Tetraplegia	Other: Video gaming for enhanced function after spinal cord injury.	Increased Electromyographic actvity of upper the upper arm with video gaming.|Increased heart rate with Video gaming	VA Palo Alto Health Care System	All	18 Years and older ¬† (Adult, Older Adult)	Phase 1	21	U.S. Fed	Interventional	Allocation: N/A|Intervention Model: Single Group Assignment|Masking: None (Open Label)|Primary Purpose: Treatment	18834	2012-02-01	2012-10-01	2012-10-01	2012-02-23		2014-12-10	Va Palo Alto Health Care System, Palo Alto, California, United States		https://ClinicalTrials.gov/show/NCT01537978
NCT01889940	Effectiveness of Psycho-emotional Support in Acute Spinal Cord Injury. ESPELMA Project	ESPELMA	Completed	No Results Available	Spinal Cord Injury, Acute|Professional-Patient Relations|Sensitivity Training Groups|Patient Non-Compliance|Satisfaction	Behavioral: Training for professionals (Spinal Cord Injury Unit staff).	Picker Patient Experience Questionnaire (PPE-33)|Resilience Scale (RS-25)|WHOQoL-BREF (26 items)|Biomedical and demographics|SCIM-III Questionnaire|ASIA Classification|HADS	Hospital Universitari Vall d'Hebron Research Institute|Fundaci√≥ La Marat√≥ de TV3	All	15 Years and older ¬† (Child, Adult, Older Adult)	Not Applicable	90	Other	Interventional	Allocation: Non-Randomized|Intervention Model: Single Group Assignment|Masking: None (Open Label)|Primary Purpose: Prevention	ESPELMA	2012-02-01	2014-09-01	2015-02-01	2013-07-01		2015-06-16	Hospital Universitari Vall d'Hebron, Barcelona, Spain		https://ClinicalTrials.gov/show/NCT01889940
NCT01498809	Blood Pressure and Brain Blood Flow Regulation After Midodrine Administration in Those With Spinal Cord Injury		Completed	No Results Available	Orthostatic Intolerance	Drug: Midodrine	Baroreflex sensitivity|Cerebral autoregulation	University of British Columbia	All	18 Years to 49 Years ¬† (Adult)		22	Other	Observational	Observational Model: Case-Only|Time Perspective: Prospective	H11-02823	2012-03-01	2013-11-01	2013-11-01	2011-12-23		2019-10-01	GF Strong Hospital and Rehabilitation Centre, Vancouver, British Columbia, Canada		https://ClinicalTrials.gov/show/NCT01498809
NCT01567605	Bowel Care and Cardiovascular Function After Spinal Cord Injury		Completed	No Results Available	Spinal Cord Injury	Drug: Lidocaine lubricant|Other: Placebo lubricant	Blood pressure change during bowel care|Duration of bowel care routine|Cardiovascular symptoms during bowel care|Heart beat abnormalities during bowel care	Simon Fraser University|University of British Columbia	All	19 Years to 80 Years ¬† (Adult, Older Adult)	Phase 4	13	Other	Interventional	Allocation: Randomized|Intervention Model: Crossover Assignment|Masking: Quadruple (Participant, Care Provider, Investigator, Outcomes Assessor)|Primary Purpose: Treatment	2011s0593	2012-03-01	2018-12-01	2018-12-01	2012-03-30		2019-04-16	Simon Fraser University, Burnaby, British Columbia, Canada|International Collaboration on Repair Discoveries, Vancouver, British Columbia, Canada		https://ClinicalTrials.gov/show/NCT01567605
NCT01891110	Prevention of Orthostatic Hypotension With Electric Stimulation in Persons With Acute SCI		Completed	No Results Available	Spinal Cord Injury|Orthostatic Hypotension	Procedure: ES of the abdominal muscles|Procedure: ES of the limb muscles|Procedure: ES of limbs & abdomen	blood pressure [mmHg]|Heart rate	Swiss Paraplegic Centre Nottwil	All	18 Years and older ¬† (Adult, Older Adult)	Not Applicable	20	Other	Interventional	Allocation: Randomized|Intervention Model: Single Group Assignment|Masking: None (Open Label)|Primary Purpose: Treatment	2011-26	2012-03-01	2014-05-01	2014-05-01	2013-07-02		2014-05-14	Swiss Paraplegic Center, Nottwil, Luzern, Switzerland		https://ClinicalTrials.gov/show/NCT01891110
NCT02031835	Body Weight Supported Treadmill Training as Physical Therapy Treatment to Spinal Cord Injury Patients		Completed	No Results Available	Spinal Cord Injury/Damage	Procedure: BWSTT (3 days a week for maximum of 20 minutes session)	WISCI II|ASIA standard neurological classification for spinal cord injury patients working sheet|Modified Ashworth scale|WHOQOL-BREF|10-item Modified Barthel Index|DXA scan|Full Body DXA scan|Hematological analysis	University of Ioannina	All	8 Years to 88 Years ¬† (Child, Adult, Older Adult)	Not Applicable	26	Other	Interventional	Allocation: N/A|Intervention Model: Single Group Assignment|Masking: None (Open Label)|Primary Purpose: Treatment	UIoannina612014	2012-03-01	2020-03-01	2020-03-01	2014-01-09		2020-11-03	University Hospital of Ioannina, Ioannina, Greece		https://ClinicalTrials.gov/show/NCT02031835
NCT01579500	Neuropathic Pain Study With Botulinum Toxin A in Spinal Cord Injury Patients		Completed	No Results Available	Spinal Cord Injury|Neuropathic Pain	Drug: Botulinum toxin type A|Drug: normal saline	Visual analogue scale	Catholic University of Korea Saint Paul's Hospital|National Health Insurance Service Ilsan Hospital|Medy-Tox	All	20 Years and older ¬† (Adult, Older Adult)	Phase 4	40	Other|Industry	Interventional	Allocation: Randomized|Intervention Model: Parallel Assignment|Masking: Double (Participant, Investigator)|Primary Purpose: Treatment	PC12MIMV0005|20120007154|suyon 2011-131	2012-04-01	2013-04-01	2013-04-01	2012-04-18		2013-04-25	Catholic University Saint Paul's Hospital; National Health Insurance Corporation Ilsan Hospital, Seoul, Korea, Republic of		https://ClinicalTrials.gov/show/NCT01579500
NCT01624779	Intrathecal Transplantation Of Autologous Adipose Tissue Derived MSC in the Patients With Spinal Cord Injury		Completed	No Results Available	Spinal Cord Injury	Drug: autologous adipose tissue derived mesenchymal stem cells	Significant MRI Change before and after intervention|Significant neurologic funtion Change before and after intervention|Significant Electrophysiological Change before and after intervention|Adverse event	Bukwang Pharmaceutical	All	19 Years to 70 Years ¬† (Adult, Older Adult)	Phase 1	15	Industry	Interventional	Intervention Model: Factorial Assignment|Masking: None (Open Label)|Primary Purpose: Treatment	KOR-01	2012-04-01	2014-05-01	2014-05-01	2012-06-21		2015-02-13	Korea University Anam Hospital, Seoul, Seongbukgu, Korea, Republic of		https://ClinicalTrials.gov/show/NCT01624779
NCT01633164	Re-Inventing Yourself After Spinal Cord Injury		Completed	No Results Available	Spinal Cord Injury	Behavioral: SCI Reinvention Protocol Participants|Other: Waitlist Group	Change in Moorong Self-Efficacy Scale (MSES) score over a 30 week time period|Change in General Self-Efficacy Scale scores over a 30 week time period	Craig Hospital	All	18 Years to 100 Years ¬† (Adult, Older Adult)	Not Applicable	81	Other	Interventional	Allocation: Randomized|Intervention Model: Parallel Assignment|Masking: Double (Investigator, Outcomes Assessor)|Primary Purpose: Treatment	H133N110006	2012-04-01	2017-09-01	2017-09-01	2012-07-04		2018-02-01	Craig Hospital, Englewood, Colorado, United States		https://ClinicalTrials.gov/show/NCT01633164
NCT02135978	Maintenance of Shoulder Health and Function After Spinal Cord Injury		Completed	No Results Available	Spinal Cord Injury|Shoulder Pain	Other: Shoulder home exercise program	Presence of shoulder pain|Activity levels	Rancho Research Institute, Inc.|Rancho Los Amigos National Rehabilitation Center	All	18 Years and older ¬† (Adult, Older Adult)	Not Applicable	148	Other	Interventional	Allocation: Randomized|Intervention Model: Parallel Assignment|Masking: Single (Outcomes Assessor)|Primary Purpose: Prevention	H133N110018	2012-04-01	2017-07-01	2017-07-01	2014-05-12		2018-04-11	Rancho Los Amigos National Rehabilitaiton Center, Downey, California, United States		https://ClinicalTrials.gov/show/NCT02135978
NCT01885962	Development and Feasibility of an Internet Intervention for Adults With Spinal Cord Injury to Prevent Pressure Ulcers	iSHIFTup	Completed	No Results Available	Spinal Cord Injury|Pressure Ulcers	Behavioral: iSHIFTup	Retrospective Diary Data|Needs Assessment Checklist (Skin Management Subscale)	University of Virginia	All	18 Years and older ¬† (Adult, Older Adult)	Not Applicable	19	Other	Interventional	Allocation: Randomized|Intervention Model: Parallel Assignment|Masking: None (Open Label)|Primary Purpose: Prevention	15409|10-175	2012-05-01	2013-06-01	2013-06-01	2013-06-25		2014-04-11	Woodrow Wilson Rehabilitation Center, Fishersville, Virginia, United States		https://ClinicalTrials.gov/show/NCT01885962
NCT03521856	Trial for Shoulder Pathology and Pain in Chronic SCI		Completed	No Results Available	Shoulder Pain	Behavioral: shoulder exercise|Behavioral: education	Change in shoulder pathology|Change in shoulder pain using the numerical rating scale|Change in shoulder pain using the WUSPI	University of Miami|U.S. Department of Education	All	18 Years and older ¬† (Adult, Older Adult)	Not Applicable	35	Other|U.S. Fed	Interventional	Allocation: Randomized|Intervention Model: Parallel Assignment|Masking: Double (Investigator, Outcomes Assessor)|Primary Purpose: Treatment	20111005	2012-05-02	2016-08-31	2016-08-31	2018-05-11		2018-05-15	University of Miami, Miami, Florida, United States		https://ClinicalTrials.gov/show/NCT03521856
NCT01222468	Effect of Cannabinoids on Spasticity and Neuropathic Pain in Spinal Cord Injured Persons		Completed	No Results Available	Muscle Spasticity as a Result of Spinal Cord Injury	Drug: nabilone 0.5 mg|Drug: placebo	Ashworth Scale|VAS (visual analog scale)pain intensity scale|Sum of the Ashworth Scale in the eight muscle groups of each side of the body.|Penn Spasm Frequency Scale|Visual Analog Scale|Pittsburgh Sleep Quality Index|Subject's Global Impression of Change|Clinician's Global Impression of Change|VAS Pain Impact Scale|The Short Form McGill Pain Questionnaire (SF-MPQ)|Neuropathic Pain Questionnaire	University of Manitoba|The Manitoba Spinal Cord Injury Research Fund|Canadian Paraplegic Association|Health Sciences Centre Foundation, Manitoba	All	18 Years to 65 Years ¬† (Adult, Older Adult)	Phase 2	12	Other	Interventional	Allocation: Randomized|Intervention Model: Crossover Assignment|Masking: Quadruple (Participant, Care Provider, Investigator, Outcomes Assessor)|Primary Purpose: Treatment	1976	2012-06-01	2015-02-01	2015-02-01	2010-10-18		2015-02-25	Health Sciences Centre Rehabilitation Hospital, Winnipeg, Manitoba, Canada		https://ClinicalTrials.gov/show/NCT01222468
NCT01621113	Combination Therapy With Dalfampridine and Locomotor Training for Chronic, Motor Incomplete Spinal Cord Injury		Completed	No Results Available	Spinal Cord Injury	Drug: Dalfampridine|Drug: Placebo	Change in 6-Minute Walk Test (6MWT) Distance at 10 Weeks|Change in 10-Meter Walk Test (10MWT) Speed at 10 Weeks|Change in Timed 25-foot walk (T25FW) Speed at 10 Weeks|Change in Walking Index for Spinal Cord Injury II (WISCI II) Scores at 10 Weeks|Change in Spinal Cord Injury Functional Ambulation Index (SCI-FAI) Scores at 10 Weeks|Changes on International Standards for Neurological Classification…	Kessler Foundation|National Institute on Disability, Independent Living, and Rehabilitation Research|Acorda Therapeutics	All	18 Years to 70 Years ¬† (Adult, Older Adult)	Phase 2	27	Other|U.S. Fed|Industry	Interventional	Allocation: Randomized|Intervention Model: Parallel Assignment|Masking: Triple (Participant, Investigator, Outcomes Assessor)|Primary Purpose: Treatment	D-732-12|H133N110020	2012-06-01	2017-10-09	2017-10-16	2012-06-18		2017-12-02	Kessler Institute for Rehabilitation, West Orange, New Jersey, United States		https://ClinicalTrials.gov/show/NCT01621113
NCT01621984	Therapeutic Riding and Neuromuscular Disease	TR NMD	Completed	No Results Available	Neuromuscular Disease	Other: Therapeutic Riding/ Hippotherapy Intervention	Change from baseline in posture control at different time points|Change from baseline in balance at different time points|Improvement in Gross Motor Function|Improvement in Gross Motor Performance|Decrease of spasticity|Improvement in Quality of life	University of Ioannina	All	4 Years to 18 Years ¬† (Child, Adult)	Phase 1	60	Other	Interventional	Allocation: N/A|Intervention Model: Single Group Assignment|Masking: Single (Outcomes Assessor)|Primary Purpose: Treatment	274/21-9-2011	2012-06-01	2016-10-01	2016-10-01	2012-06-18		2018-11-19	University Hospital of Ioannina, Ioannina, Greece		https://ClinicalTrials.gov/show/NCT01621984
NCT01873547	Different Efficacy Between Rehabilitation Therapy and Stem Cells Transplantation in Patients With SCI in China	SCI-III	Completed	No Results Available	Spinal Cord Injury	Biological: cell therapy|Other: rehabilitation	Assessment of changes in International Standards for Neurological Classification of Spinal Cord Injury according to American Spine Injury Association|Assessment of changes in score of pain index using Short-form McGill Pain Questionnaire|Assessment of changes in score of activity of daily living|Assessment of changes in sensory evoked potentials and motor evoked potentials	General Hospital of Chinese Armed Police Forces	All	20 Years to 65 Years ¬† (Adult, Older Adult)	Phase 3	300	Other	Interventional	Allocation: Randomized|Intervention Model: Parallel Assignment|Masking: Single (Outcomes Assessor)|Primary Purpose: Treatment	2013-03-04SCI-III	2012-06-01	2014-10-01	2015-12-01	2013-06-10		2018-05-25	General Hospital of Chinese People's Armed Police Forces, Beijing, Beijing, China		https://ClinicalTrials.gov/show/NCT01873547
NCT01899664	Upper Extremity Surgery in Spinal Cord Injury		Completed	No Results Available	Quadriplegia|Spinal Cord Diseases|Spinal Cord Injuries	Procedure: Nerve Transfer Surgery	Upper extremity function.|Health related quality of life.	Washington University School of Medicine	All	18 Years to 60 Years ¬† (Adult)	Not Applicable	17	Other	Interventional	Allocation: N/A|Intervention Model: Single Group Assignment|Masking: None (Open Label)|Primary Purpose: Treatment	201205104	2012-06-01	2021-10-01	2021-10-01	2013-07-15		2021-11-03	Washington University Division of Plastic Surgery, Saint Louis, Missouri, United States		https://ClinicalTrials.gov/show/NCT01899664
NCT02000518	Emergency Radiotherapy in Metastatic Spinal Cord Compression of Patients With Non-small Cell Lung Cancer	CK-INF	Completed	No Results Available	Neurological Outcome|Survival From First Diagnosis Metastatic Spinal Cord Compression to Death	Radiation: external beam radiotherapy	neurological outcome|local control	Heidelberg University	All	18 Years to 80 Years ¬† (Adult, Older Adult)		15	Other	Observational	Observational Model: Cohort|Time Perspective: Prospective	S-514/2011	2012-07-01	2013-06-01	2013-06-01	2013-12-04		2013-12-04	University hospital of Heidelberg, Departement radiation oncology, Heidelberg, Germany		https://ClinicalTrials.gov/show/NCT02000518
NCT02703883	Body Weight Support in Spinal Cord Injury		Completed	No Results Available	Spinal Cord Injury	Device: BWST	Jerk (Derivative of the acceleration of the mass center as marker oscillation of the control the center of mass)|Walking Index for Spinal Cord Injury (WISCI) scale	University of Chile	Male	18 Years to 70 Years ¬† (Adult, Older Adult)	Not Applicable	17	Other	Interventional	Allocation: N/A|Intervention Model: Single Group Assignment|Masking: None (Open Label)|Primary Purpose: Diagnostic	CLC-1	2012-07-01	2015-11-01	2015-12-01	2016-03-09		2016-03-09	Cl√≠nica Los Coihues, Santiago, Regi√≥n Metropolitana, Chile		https://ClinicalTrials.gov/show/NCT02703883
NCT01884662	Virtual Walking for Neuropathic Pain in Spinal Cord Injury		Completed	No Results Available	Spinal Cord Injury|Neuropathic Pain	Behavioral: Virtual walking|Behavioral: Wheeling tape	Changes in Numeric Rating Scale|Changes in fMRI correlates of neuropathic pain|Changes in Pain Interference|Changes in Neuropathic Pain Scale	University of Alabama at Birmingham	All	19 Years to 65 Years ¬† (Adult, Older Adult)	Not Applicable	67	Other	Interventional	Allocation: Randomized|Intervention Model: Parallel Assignment|Masking: Single (Outcomes Assessor)|Primary Purpose: Treatment	H133N110008VWalking	2012-09-01	2021-04-30	2021-06-30	2013-06-24		2021-08-30	Spain REhabilitation Center, Birmingham, Alabama, United States		https://ClinicalTrials.gov/show/NCT01884662
NCT01674764	Surgical Treatment for Spinal Cord Injury	SCI-POEM	Completed	No Results Available	Acute Spinal Cord Injury of Traumatic Origin (tSCI)	Procedure: Early surgical intervention|Procedure: Late surgical intervention	Change in American Spinal Injury Association Lower Extremities Motor Score (ASIALEMS) between pre-surgery and 1-year post-surgery FU|Change in American Spinal Injury Association Motor Score (ASIAMS) between pre-surgery and 1-year FU|Change in American Spinal Injury Association Upper Extremities Motor Score (ASIAUEMS) between pre-surgery and 1-year FU|Change in American Spinal Injury Association I…	AOSpine Europe	All	18 Years and older ¬† (Adult, Older Adult)		297	Industry	Observational	Observational Model: Cohort|Time Perspective: Prospective	SCI-POEM	2012-11-01	2019-10-01	2019-10-01	2012-08-29		2020-05-13	Medical University Innsbruck, Innsbruck, Austria|National Institute of Emergency Medicine "N.I. Pirogov", Sofia, Bulgaria|Teaching Hospital Sisiters of Charity, Zagreb, Croatia|H√¥spital P. Wertheimer, Lyon, France|BG Unfallklinik Frankfurt, Frankfurt, Germany|Berufsgenossenschaftliche Unfallklinik Ludwigshafen, Ludwigshafen, Germany|Mater Misericordiae University Hospital, Dublin, Ireland|Ospeda…		https://ClinicalTrials.gov/show/NCT01674764
NCT01739023	Safety of Autologous Human Schwann Cells (ahSC) in Subjects With Subacute SCI		Completed	No Results Available	Spinal Cord Injury|Paraplegia	Biological: Autologous Human Schwann Cells	International Standards of Neurological Classification for Spinal Cord Injury|MRI of spinal cord|Neuropathic pain|Spinal Cord Independence Measure III|Functional Independence Measure|Motor Evoked Potentials|Somatosensory Evoked Potentials|Autonomic - Head-up Tilt|Autonomic - Sympathetic Skin Response|ISCI Basic Bowel Dataset|ISCI Basic Lower Urinary Tract Dataset|SF-12|Patient Global Impression o…	W. Dalton Dietrich|The Miami Project to Cure Paralysis|University of Miami	All	18 Years to 60 Years ¬† (Adult)	Phase 1	9	Other	Interventional	Allocation: N/A|Intervention Model: Single Group Assignment|Masking: None (Open Label)|Primary Purpose: Treatment	20081061	2012-11-01	2016-08-01	2016-08-01	2012-11-30		2019-03-05	University of Miami Miller School of Medicine, Miami, Florida, United States		https://ClinicalTrials.gov/show/NCT01739023
NCT02180880	Symptom Based Treatment of Neuropathic Pain		Completed	No Results Available	Neuralgia|Spinal Cord Injury	Drug: Pregabalin and Oxcarbazepine	Symptom based treatment of neuropathic pain	Ju Seok Ryu|CHA University	All	20 Years and older ¬† (Adult, Older Adult)	Phase 4	63	Other	Interventional	Allocation: N/A|Intervention Model: Single Group Assignment|Masking: None (Open Label)|Primary Purpose: Treatment	NeuropathicPain	2012-11-01	2014-08-01	2014-08-01	2014-07-03		2014-08-20	CHA University, Seongnam-si, Kyounggi-do, Korea, Republic of		https://ClinicalTrials.gov/show/NCT02180880
NCT01935687	Clinical Evaluation of Instrumented Wheel as Biomedical Device Quantifying the Displacement Efficiency	FRM	Completed	No Results Available	Spinal Cord Injury	Device: Using of instrumented wheel|Device: Using of ergometer roller	Mechanical power calculated by instrumented wheel and ergometer roller.|Efficient fraction of total power calculated using instrumented wheel|Efficient fraction of total power calculated using ergometer roller	Assistance Publique - H√¥pitaux de Paris	All	18 Years to 70 Years ¬† (Adult, Older Adult)	Not Applicable	62	Other	Interventional	Intervention Model: Crossover Assignment|Masking: None (Open Label)|Primary Purpose: Treatment	P101006	2012-12-01	2014-04-01	2015-07-01	2013-09-05		2017-11-20	Djamel Bensmail, Garches, Hauts-de-Seine, France		https://ClinicalTrials.gov/show/NCT01935687
NCT02026167	Spinal Cord Injury Collaborative Care Study	SCI-Care	Completed	No Results Available	Spinal Cord Injury	Behavioral: Collaborative Care	Change in Quality of Life|Change in Pain|Change in Mood|Change in Physical Activity|Adverse events	University of Washington|U.S. Department of Education	All	18 Years and older ¬† (Adult, Older Adult)	Not Applicable	174	Other|U.S. Fed	Interventional	Allocation: Randomized|Intervention Model: Parallel Assignment|Masking: Single (Outcomes Assessor)|Primary Purpose: Treatment	STUDY00001791	2012-12-01	2016-06-01	2016-06-01	2014-01-01		2019-02-26			https://ClinicalTrials.gov/show/NCT02026167
NCT02034331	IR and Microvascular Blood Flow in SCI		Completed	No Results Available	Spinal Cord Injury|Insulin Resistance	Drug: Insulin iontophoresis|Drug: Placebo Iontophoresis|Drug: Acetylcholine Iontophoresis|Other: Heat application	Cutaneous microvascular responses to insulin iontophoresis	James J. Peters Veterans Affairs Medical Center	All	20 Years to 69 Years ¬† (Adult, Older Adult)	Not Applicable	68	U.S. Fed	Interventional	Allocation: Non-Randomized|Intervention Model: Parallel Assignment|Masking: None (Open Label)|Primary Purpose: Diagnostic	LAF-12-018|Pending	2012-12-01	2015-12-01	2016-12-01	2014-01-13		2017-03-07	James J. Peters VA Medical Center, Bronx, New York, United States		https://ClinicalTrials.gov/show/NCT02034331
NCT01718977	Cardiovascular Health/Outcomes: Improvements Created by Exercise and Education in SCI (CHOICES)	CHOICES	Completed	No Results Available	Spinal Cord Injury	Other: Body Weight Supported Treadmill Training|Other: Arm Cycle Ergometry Training	The effect of Body Weight Support Treadmill Training (BWSTT) on carotid-to-femoral pulse wave velocity (cfPWV) in people with Spinal Cord Injury (SCI) at 3- and 6-months of exercise.|The effect of Body Weight Support Treadmill Training (BWSTT) on Cardiovascular parameters in people with Spinal Cord Injury (SCI) at 3- and 6-months of exercise.|The effect of 6-months Body Weight Support Treadmill T…	University of British Columbia|McMaster University|Toronto Rehabilitation Institute|Canadian Institutes of Health Research (CIHR)	All	18 Years to 60 Years ¬† (Adult)	Not Applicable	46	Other	Interventional	Allocation: Randomized|Intervention Model: Parallel Assignment|Masking: Single (Participant)|Primary Purpose: Treatment	H12-02945	2013-01-01	2019-10-17	2019-10-17	2012-11-01		2019-12-02	International Collaboration On Repair Discoveries, Vancouver, British Columbia, Canada|McMaster University, Hamilton, Ontario, Canada|Toronto Rehabilitation Institute, Toronto, Ontario, Canada		https://ClinicalTrials.gov/show/NCT01718977
NCT01769872	Safety and Effect of Adipose Tissue Derived Mesenchymal Stem Cell Implantation in Patients With Spinal Cord Injury		Completed	No Results Available	Spinal Cord Injury	Procedure: Autologous Adipose Tissue derived MSCs Transplantation	ASIA (American Spinal Injury Association) scale|Magnetic Resonance Imaging|MEP/SSEP|ADL (activities of daily living)|SF-36|ODI (Oswestry Disability Questionnaire)|Frequency of Adverse Events	R-Bio|Korea University Anam Hospital	All	19 Years to 70 Years ¬† (Adult, Older Adult)	Phase 1|Phase 2	15	Industry|Other	Interventional	Allocation: N/A|Intervention Model: Single Group Assignment|Masking: None (Open Label)|Primary Purpose: Treatment	KSC-MSCs-SPI	2013-01-01	2016-01-01		2013-01-17		2016-08-02	Korea University Anam Hospital, Seoul, Korea, Republic of		https://ClinicalTrials.gov/show/NCT01769872
NCT01903226	Intervention Study to Assess the Effects of Moderate and High Intensity Aerobic Training on Physical Capacity and Activity Level in Persons With Incomplete Spinal Cord Injury		Completed	No Results Available	Spinal Cord Injury	Other: High intensity training|Other: Moderate intensity training	change in VO2peak	Sunnaas Rehabilitation Hospital	All	18 Years to 65 Years ¬† (Adult, Older Adult)	Not Applicable	30	Other	Interventional	Allocation: Randomized|Intervention Model: Parallel Assignment|Masking: Single (Investigator)|Primary Purpose: Treatment	SPREK	2013-01-01	2017-01-01	2018-04-01	2013-07-19		2018-04-19	Sunnaas Rehabilitation Hospital, Nesoddtangen, Norway		https://ClinicalTrials.gov/show/NCT01903226
NCT01800604	Power Over Pain (POP) Study	POP	Completed	No Results Available	Multiple Sclerosis|Spinal Cord Injury|Chronic Pain|Other and Unspecified Amputation Stump Complications|Muscular Dystrophies|Low Back Pain	Behavioral: Pain Self-Management Intervention #1|Behavioral: Pain Self-Management Intervention #2|Behavioral: Pain Self-Management Intervention #3|Behavioral: Pain Self-Management Intervention #4	Change in average pain intensity pre-treatment to post-treatment	University of Washington|Eunice Kennedy Shriver National Institute of Child Health and Human Development (NICHD)|National Institutes of Health (NIH)	All	18 Years and older ¬† (Adult, Older Adult)	Not Applicable	177	Other|NIH	Interventional	Allocation: Randomized|Intervention Model: Parallel Assignment|Masking: Double (Participant, Outcomes Assessor)|Primary Purpose: Treatment	43605|1R01HD070973	2013-02-01	2018-01-01	2018-01-01	2013-02-27		2018-10-17	University of Washington, Ninth and Jefferson Building, Seattle, Washington, United States		https://ClinicalTrials.gov/show/NCT01800604
NCT02370862	Transdermal Administration of a Prokinetic Agent for Bowel Evacuation in Persons With SCI		Completed	No Results Available	Spinal Cord Injury|Neurogenic Bowel	Drug: Neostigmine and Glycopyrrolate	Biological Responses to Study Drugs (quantified by the presence and strength of biological responses (changes in bowel sounds, heart rate and airway resistance and bowel movement occurrence)|Safety of Study Medication (quantified through monitoring of side effects during study visits and through patient self report as measured by the Treatment Satisfaction Questionnaire)	James J. Peters Veterans Affairs Medical Center	All	18 Years to 75 Years ¬† (Adult, Older Adult)	Early Phase 1	28	U.S. Fed	Interventional	Allocation: N/A|Intervention Model: Single Group Assignment|Masking: None (Open Label)|Primary Purpose: Treatment	KOR-13-02	2013-02-01	2016-12-01	2016-12-01	2015-02-25		2017-03-07	James J. Peters VA Medical Center, Bronx, New York, United States		https://ClinicalTrials.gov/show/NCT02370862
NCT02860403	Motor Imagery for Reach-to-grasp Rehabilitation After Tetraplegia		Completed	No Results Available	Tetraplegia C5-C6|Tetraplegia C6-C7	Procedure: motor imagery	Motor imagery ability|Movement time (MT)|absolute time to peak velocity|movement amplitude at peak velocity|time to opening|time to maximal opening|amplitude of maximal opening|Trajectory of movement measured in the XY plane|height of elbow and wrist at the moment of grasping an object, measured in mm in the YZ plane|muscular force evaluated by muscle testing performed by a physiotherapist|joint …	Hospices Civils de Lyon	All	18 Years to 55 Years ¬† (Adult)	Not Applicable	16	Other	Interventional	Allocation: Non-Randomized|Intervention Model: Parallel Assignment|Masking: None (Open Label)|Primary Purpose: Supportive Care	2008-541	2013-02-01	2013-03-01	2013-03-01	2016-08-09		2019-05-28	H√¥pital Henry Gabrielle - M√©decine physique et R√©adaptation, Hospices Civils de Lyon, 20 Route de Vourles,, Saint-Genis-Laval, France		https://ClinicalTrials.gov/show/NCT02860403
NCT02342080	Effects of System Suspended Robotic Lokomat Gait in Patients With Incomplete Spinal Cord Injury		Completed	No Results Available	Spinal Cord Injury	Other: Training sessions|Device: Lokomat system (Hocoma AG Switzerland)	Walking Index for Spinal Cord Injury II	University of Sao Paulo General Hospital	All	16 Years to 60 Years ¬† (Child, Adult)	Not Applicable	15	Other	Interventional	Allocation: N/A|Intervention Model: Single Group Assignment|Masking: Single (Investigator)|Primary Purpose: Treatment	0718.0.015.000-11	2013-03-01	2014-06-01	2015-02-01	2015-01-19		2015-05-12	Centro de Pesquisa Cl√≠nica do Instituto de Medicina F√≠sica e Reabilita√ß√£o do HCFMUSP, Sao Paulo, Brazil		https://ClinicalTrials.gov/show/NCT02342080
NCT04331405	Allogeneic Cord Blood Cells for Adults With Severe Acute Contusion Spinal Cord Injury		Completed	No Results Available	Spinal Cord Contusion	Biological: Human Allogeneic Umbilical Cord Blood Mononuclear Cells (hUCBMCs) systemic (i.v.) infusions	Incidence of Treatment-Emergent Adverse Events [Safety]|Neurological Deficit Change [ASIA scale]|Quality of Life [FIM scale]|Motor Deficit Change [Muscle Strength]|Independent Verticalization Ability|Lower Extremities Spasticity Level [Modified Asworth scale]|Feeling of Bladder Filling|Urinary Inconsistence|Spinal Cord Conductivity [Electrophysiological assessment]	Sklifosovsky Institute of Emergency Care|National Medical Research Center for Cardiology, Ministry of Health of Russian Federation	All	18 Years to 65 Years ¬† (Adult, Older Adult)	Phase 1|Phase 2	20	Other	Interventional	Allocation: Randomized|Intervention Model: Parallel Assignment|Masking: None (Open Label)|Primary Purpose: Treatment	41-18/03/2013	2013-03-18	2018-03-21	2018-09-05	2020-04-02		2020-04-02	N.V. Sklifosovsky Emergency Care Institute, Moscow, Russian Federation		https://ClinicalTrials.gov/show/NCT04331405
NCT02298660	Botox for Neurogenic Detrusor Overactivity and the Prevention of Autonomic Dysreflexia Following SCI		Completed	No Results Available	Autonomic Dysreflexia	Drug: BOTOX	Assess the efficacy of 200 U BOTOX¬Æ intradetrusor injections on amelioration of episodes of autonomic dysreflexia (AD) in individuals with chronic spinal cord injury during urodynamics (i.e. one month following treatment compared to baseline assessment)|Reduction of spontaneous AD during daily living assessed with 24-hour ambulatory blood pressure monitoring (ABPM) following intradetrusor inject…	Rick Hansen Institute|University of British Columbia|International Collaboration On Repair Discoveries (ICORD)|Vancouver Coastal Health	All	18 Years to 65 Years ¬† (Adult, Older Adult)	Phase 4	55	Other	Interventional	Allocation: N/A|Intervention Model: Single Group Assignment|Masking: None (Open Label)|Primary Purpose: Prevention	H12-02215	2013-04-01	2017-10-17	2017-12-15	2014-11-24		2019-12-26	International Collaboration on Repair Discoveries (ICORD), Vancouver, British Columbia, Canada		https://ClinicalTrials.gov/show/NCT02298660
NCT01851499	Ultramicronized PEA (Normast) in Spinal Cord Injury Neuropathic Pain		Completed	No Results Available	Neuropathic Pain|Spinal Cord Injury	Dietary Supplement: Ultramicronized PEA (Normast)	Change in mean pain intensity on a 0-10 numerical rating scale from baseline week to last week of treatment|Spasticity/spasms and sleep disturbance, change in mean score from baseline to last week of treatment|Modified Tardieu and clonus over ankle joints|Spasticity and spasms on a 0-10 NRS|Health related quality of life S-TOPS|Global Impression of Change|Pain relief of overall pain and at-and be…	Danish Pain Research Center|Spinal Cord Injury Centre of Western Denmark|Glostrup University Hospital, Copenhagen|Epitech Group SRL, Italy	All	18 Years and older ¬† (Adult, Older Adult)	Not Applicable	73	Other	Interventional	Allocation: Randomized|Intervention Model: Parallel Assignment|Masking: Double (Participant, Investigator)|Primary Purpose: Treatment	Normast-2013	2013-05-01	2015-05-01	2015-10-01	2013-05-10		2015-10-20	Department of Spinal Cord Injuries, Hornbaek, Denmark|Spinal Cord Injury Centre of Western Denmark, Viborg, Denmark		https://ClinicalTrials.gov/show/NCT01851499
NCT01855594	Study to Evaluate the Efficacy of Lithium Carbonate in Spinal Cord Injury Patients With Neuropathic Pain		Completed	No Results Available	Neuropathic Pain|Neuralgia|Spinal Cord Injuries	Drug: Lithium Carbonate|Drug: Placebo	Change from Baseline in Numeric Rating Scale (NRS) at 24 weeks|Change in Multidimensional Pain Inventory Life Interference Subscale (MPI-LIS)|Change in Short-Form 36 single question|Change in Sleep Interference Assessment score|Change in weekly number of days with pain attack|Change in the Patient Global Impression of Change (PGIC)|Change in Patient Health Questionnaire (PHQ-9)|Change in sensory …	China Spinal Cord Injury Network|China Rehabilitation Research Center|Second Affiliated Hospital of Xi'an Jiaotong University	All	18 Years to 65 Years ¬† (Adult, Older Adult)	Phase 2	60	Other	Interventional	Allocation: Randomized|Intervention Model: Parallel Assignment|Masking: Quadruple (Participant, Care Provider, Investigator, Outcomes Assessor)|Primary Purpose: Treatment	CN302	2013-05-01	2015-06-01	2015-06-01	2013-05-16		2016-01-28	Xi'an Jiaotong University Second Affiliated Hospital, Xi'an, Shanxi, China|China Rehabilitation Research Center, Beijing, China		https://ClinicalTrials.gov/show/NCT01855594
NCT01874782	Transcranial Electrical Stimulation for Management of Orthostatic Instability in Acute Cervical Spinal Cord Injury		Completed	No Results Available	Orthostatic Hypotension|Postural Hypotension	Device: transcranial electrical stimulation	Change in orthostatic decrease in BP in response to six sessions of TES, determined via the established bedside sit-up test|Long term change in BP.	University of British Columbia|Vancouver Coastal Health Research Institute	All	18 Years to 65 Years ¬† (Adult, Older Adult)	Phase 2	4	Other	Interventional	Allocation: N/A|Intervention Model: Single Group Assignment|Masking: None (Open Label)|Primary Purpose: Treatment	H12-03534	2013-05-01	2015-07-01	2015-07-01	2013-06-11		2019-04-23	GF Strong Rehabilitation Center - Vancouver Coastal Health Research Institute, Vancouver, British Columbia, Canada		https://ClinicalTrials.gov/show/NCT01874782
NCT02316067	Traumatic Spinal Cord Injury: Effects of Corporal Suspension and Pendulum Exercises		Completed	No Results Available	Spinal Cord Injuries	Other: Rehabilitation	Torque change ( assessed by dynamometry.)|Muscular electrical activation change (assessed by electromyography (EMG)	Marco Aur√©lio Vaz, PhD|Coordena√ß√£o de Aperfei√ßoamento de Pessoal de N√≠vel Superior.|Conselho Nacional de Desenvolvimento Cient√≠fico e Tecnol√≥gico|Federal University of Rio Grande do Sul	Male	18 Years to 65 Years ¬† (Adult, Older Adult)	Not Applicable	26	Other	Interventional	Allocation: Randomized|Intervention Model: Parallel Assignment|Masking: Single (Outcomes Assessor)|Primary Purpose: Treatment	UFRGS - 70254	2013-05-01	2014-01-01	2014-01-01	2014-12-12		2014-12-12	Exercise Research Laboratory, School of Physical Education, Federal University of Rio Grande do Sul, Porto Alegre, Rio Grande do Sul, Brazil		https://ClinicalTrials.gov/show/NCT02316067
NCT03834324	Functional Electrical Stimulation During Cycling in People With Spinal Cord Injury	iCycle	Completed	No Results Available	Spinal Cord Injuries	Device: FES	International Standards for Neurological Classification of Spinal Cord Injury (ISNC-SCI).|Oxford scale motor power grading|Modified Ashworth Score (MAS)|Spinal Cord Independence Measure (SCIM)|Walking Index for Spinal Cord Injury (WISCI II)	University of Southampton|University College, London	All	18 Years to 90 Years ¬† (Adult, Older Adult)	Not Applicable	11	Other	Interventional	Allocation: N/A|Intervention Model: Single Group Assignment|Masking: None (Open Label)|Primary Purpose: Treatment	6054	2013-05-03	2016-04-29	2018-03-01	2019-02-07		2021-10-08			https://ClinicalTrials.gov/show/NCT03834324
NCT01852279	BCI and FES for Hand Therapy in Spinal Cord Injury		Completed	No Results Available	Spinal Cord Injury	Device: BCI-FES|Device: Passive muscle stimulation	Muscle strength as measured by the Oxford manual test|Changes in patients EEG before and after each treatment session|Difference in EEG between the treatment and the control group|Difference in Somatosensory evoked potential between the treatment and control group|Difference in somatosensory evoked potential before and after a treatment session|Patient's experience of using BCI-FES|Quadriplegia i…	NHS Greater Glasgow and Clyde|University of Glasgow	All	18 Years to 70 Years ¬† (Adult, Older Adult)	Not Applicable	15	Other	Interventional	Allocation: Randomized|Intervention Model: Parallel Assignment|Masking: Double (Participant, Investigator)|Primary Purpose: Treatment	GN12NE574	2013-05-08	2018-12-31	2018-12-31	2013-05-13		2020-12-19	Queen Elizabeth National Spinal Injuries Unit, Glasgow, United Kingdom		https://ClinicalTrials.gov/show/NCT01852279
NCT01851629	Walking Adaptability Post-Spinal Cord Injury		Completed	No Results Available	Incomplete Spinal Cord Injury|Brown Sequard Syndrome	Behavioral: Locomotor Training|Other: Cross-Sectional Testing (No Intervention)	Changes in joint movement (Kinematics)|Changes in falls risks during adaptive walking challenges|Changes in functional integrity of spinal pathways	University of Florida|United States Department of Defense|Malcom Randall VA Medical Center|James A. Haley Veterans Administration Hospital|Brooks Rehabilitation	All	18 Years and older ¬† (Adult, Older Adult)	Not Applicable	7	Other|U.S. Fed	Interventional	Allocation: Randomized|Intervention Model: Crossover Assignment|Masking: None (Open Label)|Primary Purpose: Treatment	01-2013|W81XWH-11-1-0454	2013-06-01	2015-02-01	2015-02-01	2013-05-10		2015-05-01	University of Florida, Gainesville, Florida, United States|Brain Rehabilitation Research Center, Malcom Randall VAMC, Gainesville, Florida, United States|Brooks Rehabilitation, Jacksonville, Florida, United States|James A. Haley VA Medical Center, Tampa, Florida, United States		https://ClinicalTrials.gov/show/NCT01851629
NCT02096913	Safety Study of Ibuprofen to Treat Acute Traumatic Spinal Cord Injury		Completed	No Results Available	Spinal Cord Injury	Drug: Dolormin¬Æ extra (Ibuprofen)	Number of patients with severe gastroduodenal bleedings as a measure of safety|Spasticity on the Modified Ashworth Scale (MAS)|Pain on the Neuropathic Pain Scale (NPS)|International standards for neurological classification of spinal cord injury (ISNCSCI) - ASIA impairment scale (AIS) change from baseline|Neurological motor function on the ISNCSCI/ASIA motor scores change from baseline|Neurologic…	Jan M. Schwab, MD, PhD|Else Kr√∂ner Fresenius Foundation|Charite University, Berlin, Germany	All	18 Years to 65 Years ¬† (Adult, Older Adult)	Phase 1	12	Other	Interventional	Allocation: Non-Randomized|Intervention Model: Single Group Assignment|Masking: None (Open Label)|Primary Purpose: Treatment	Ibuprofen-SCI-Safety|2011-000584-28	2013-06-01	2017-09-01	2017-09-01	2014-03-26		2017-10-30	Unfallkrankenhaus Berlin, Treatment Centre for Spinal Cord Injuries, Warener Stra√üe 7, Berlin, Germany		https://ClinicalTrials.gov/show/NCT02096913
NCT02168465	Internet Self-Management for People With Intermittent Urinary Catheters	Internet CIC	Completed	No Results Available	Spinal Cord Injury	Behavioral: teaching self-management of an intermittent catheter	catheter-related adverse health outcomes (e.g., UTI, urine leakage)|Intermittent catheter self-efficacy,	University of Rochester|National Institute of Nursing Research (NINR)	All	18 Years and older ¬† (Adult, Older Adult)	Not Applicable	34	Other|NIH	Interventional	Allocation: N/A|Intervention Model: Single Group Assignment|Masking: None (Open Label)|Primary Purpose: Prevention	5R21NR012763-02	2013-06-01	2015-02-01	2015-02-01	2014-06-20		2015-05-07	University of Rochester, Rochester, New York, United States		https://ClinicalTrials.gov/show/NCT02168465
NCT02482194	Autologous Mesenchymal Stem Cells Transplantation for Spinal Cord Injury- A Phase I Clinical Study		Completed	No Results Available	Spinal Cord Injury	Biological: mesenchymal stem cells	Number of adverse events|Sensory and motor strength|Functional Independence|Muscle strength assessment	National Institute of Blood and Marrow Transplant (NIBMT), Pakistan|Armed Forces Institute of Regenerative Medicine	All	18 Years to 50 Years ¬† (Adult)	Phase 1	9	Other|U.S. Fed	Interventional	Allocation: N/A|Intervention Model: Single Group Assignment|Masking: None (Open Label)|Primary Purpose: Treatment	AFBMTC-SCI-2013	2013-06-01	2016-01-01	2016-03-01	2015-06-26		2016-06-29	Armed Forces Bone Marrow Transplant Centre, Rawalpindi, Pakistan		https://ClinicalTrials.gov/show/NCT02482194
NCT01484184	Study to Assess Safety, Tolerability and MTD of a Central Pattern Generator-activating Tritherapy (SPINALON) in Patients With Chronic Spinal Cord Injury		Completed	No Results Available	Spinal Cord Injury	Drug: SPINALON (buspirone + levodopa + cardidopa)	Heart rate|Tolerability of common AEs|Pharmacokinetics|Blood pressure|Respiration rate|Oxygen saturation|Temperature|Change in hematology and biochemistry laboratory parameters|Occurrence of rhythmic leg EMGs	Nordic Life Science Pipeline Inc.|United States Department of Defense	All	18 Years to 65 Years ¬† (Adult, Older Adult)	Phase 1|Phase 2	50	Other|U.S. Fed	Interventional	Allocation: Randomized|Intervention Model: Factorial Assignment|Masking: Double (Participant, Investigator)|Primary Purpose: Treatment	SPIN-01	2013-07-01	2015-08-01	2015-08-01	2011-12-02		2015-08-20	McGill University Health Centre (Montreal General Hospital), Montreal, Quebec, Canada		https://ClinicalTrials.gov/show/NCT01484184
NCT01896037	Omega-3 Supplementation for Tetraplegics With Poor Cholesterol Levels		Completed	No Results Available	Spinal Cord Injury|Tetraplegia|Quadraplegia|Low HDL-c|High LDL-c	Dietary Supplement: Omega-3 supplements	Blood plasma levels of HDL-cholesterol|Blood plasma levels of total cholesterol	University of Manitoba|The Association of Rehabilitation Medicine in Manitoba	All	18 Years and older ¬† (Adult, Older Adult)	Phase 4	21	Other	Interventional	Allocation: N/A|Intervention Model: Single Group Assignment|Masking: None (Open Label)|Primary Purpose: Treatment	HDL2013	2013-07-01	2017-01-28	2017-03-28	2013-07-11		2017-05-04	Health Sciences Centre, Winnipeg, Manitoba, Canada		https://ClinicalTrials.gov/show/NCT01896037
NCT01807728	Training Programs to Improve Outcomes for Individuals With Spinal Cord Injury		Completed	No Results Available	Spinal Cord Injuries	Other: Group 1 Training Program|Other: Group 2 Training Program	Change from baseline in quality of life at 1 year|Change from baseline in quality of life at 1 month	University of Pittsburgh|U.S. Department of Education	All	18 Years to 75 Years ¬† (Adult, Older Adult)	Not Applicable	400	Other|U.S. Fed	Interventional	Allocation: Randomized|Intervention Model: Factorial Assignment|Masking: Double (Participant, Outcomes Assessor)|Primary Purpose: Prevention	12090536|H133A120004	2013-08-01	2015-09-01	2018-03-12	2013-03-08		2020-04-06	South Florida Spinal Cord Injury System, Miami, Florida, United States|Midwest Regional Spinal Cord Injury Care System, Chicago, Illinois, United States|Northern New Jersey Spinal Cord System, West Orange, New Jersey, United States|University of Pittsburgh Model Center on Spinal Cord Injury, Pittsburgh, Pennsylvania, United States		https://ClinicalTrials.gov/show/NCT01807728
NCT01953666	Evaluation of the Efficiency of Word Prediction Software to Text Input Speed for Tetraplegia	Smartwrite	Completed	No Results Available	Settings Word Prediction Software|Rehabilitation Program	Other: Rehabilitation program|Other: Self - Training at home	Change from Text Input Speed at 1 month|Change from Errors at 1 month|Change from Prediction use at 1 month|Change from Satisfaction|Change from Cognitive load at 1 month|Change from Speed sensation at 1 month	Centre d'Investigation Clinique et Technologique 805	All	18 Years to 70 Years ¬† (Adult, Older Adult)	Not Applicable	42	Other	Interventional	Allocation: Randomized|Intervention Model: Parallel Assignment|Masking: Single (Outcomes Assessor)|Primary Purpose: Treatment	12053	2013-09-01	2015-09-01	2017-07-01	2013-10-01		2018-09-06	Hopital Raymond Poincare, Garches, France		https://ClinicalTrials.gov/show/NCT01953666
NCT03573726	Use of a Diurnal Indwelling Urethral Catheter to Improve Quality of Life		Completed	No Results Available	Spina Bifida|Neurogenic Bladder	Other: Closed diurnal indwelling catheter (CDIC)	Medical Outcomes Trust SF-36|Urinary continence|PedsQL	Shriners Hospitals for Children	All	10 Years to 21 Years ¬† (Child, Adult)	Not Applicable	14	Other	Interventional	Allocation: N/A|Intervention Model: Single Group Assignment|Masking: None (Open Label)|Primary Purpose: Other	429063	2013-09-11	2016-04-22	2016-12-31	2018-06-29		2018-06-29			https://ClinicalTrials.gov/show/NCT03573726
NCT01904591	The Effects of Anti-oxidants on Clinical Outcomes and Radiological Features of Chronic Spinal Cord Injury: A Pilot Study		Completed	No Results Available	Spinal Cord Injury	Dietary Supplement: Selenium|Dietary Supplement: Vitamin E	Change in MRI Tractography|Change in ASIA motor score over time.	McMaster University	All	18 Years and older ¬† (Adult, Older Adult)	Not Applicable	4	Other	Interventional	Allocation: N/A|Intervention Model: Single Group Assignment|Masking: None (Open Label)|Primary Purpose: Treatment	SCIantiox1	2013-10-01	2016-07-01	2016-07-01	2013-07-22		2016-09-13	Regional Rehabilitation Centre At Hamilton General Hospital, Hamilton, Ontario, Canada		https://ClinicalTrials.gov/show/NCT01904591
NCT01920243	Evaluation of a Bowel and Bladder Health Management Program for Individuals With Spinal Cord Injury (SCI)		Completed	No Results Available	Injuries, Spinal Cord|Neurogenic Bowel|Urinary Bladder, Neurogenic	Behavioral: Health Mechanics Program	Spinal Cord Injury Quality of Life (SCI-QOL) Emotional Domain|SCI-QOL Physical Domain|SCI-QOL Social Domain|Bowel and Bladder Treatment Index (BBTI)|Adapted version of the SCI Knowledge Questionnaire - SF|Social Problem Solving Inventory - Revised: Short Form (SPSI-R:S)|Appraisals of Disability: Primary and Secondary Scale (ADAPSS)|Disability Management Self Efficacy Scale (DMSES) - SF|Behavioral…	University of Michigan|U.S. Department of Education	All	18 Years and older ¬† (Adult, Older Adult)	Not Applicable	63	Other|U.S. Fed	Interventional	Allocation: Randomized|Intervention Model: Parallel Assignment|Masking: Single (Outcomes Assessor)|Primary Purpose: Treatment	H133N110002 -2	2013-10-28	2017-02-21	2017-02-21	2013-08-09		2017-10-17	University of Michigan Spinal Cord Injury Model System, Ann Arbor, Michigan, United States		https://ClinicalTrials.gov/show/NCT01920243
NCT01963026	Linking Brain to Behaviour Research in SCI		Completed	No Results Available	Cervical Spinal Cord Injury	Other: ToCUEST featuring a 'variable practice' approach.|Other: ToCUEST featuring a 'constant practice' approach.	Change from baseline VanLieshout hand function test for Tetraplegia (Short Form) (VLT-SF) at 3 weeks|Change from baseline VanLieshout hand function test for Tetraplegia (Short Form) (VLT-SF) at 6 weeks|Changes from baseline surface electromyography (EMG) activity patterns at 3 weeks|Changes from baseline surface electromyography (EMG) activity patterns at 6 weeks|Change from baseline Spinal Cord …	Adelante, Centre of Expertise in Rehabilitation and Audiology|Adelante rehabilitation Centre|Maastricht University	All	18 Years to 70 Years ¬† (Adult, Older Adult)	Not Applicable	5	Other	Interventional	Allocation: N/A|Intervention Model: Single Group Assignment|Masking: None (Open Label)|Primary Purpose: Treatment	NL44697.068.13	2013-11-01	2015-06-01	2015-07-01	2013-10-16		2015-12-29	Adelante Rehabilitation Centre, Hoensbroek, Limburg, Netherlands		https://ClinicalTrials.gov/show/NCT01963026
NCT02098135	ArmeoSenso - Home Therapy and Assessment for Patients With Arm Impairments Based on Wearable Movement Sensors		Completed	No Results Available	Stroke|Spinal Cord Injury	Device: ArmeoSenso	Numbers of participant which can perform the ArmeoSenso - training.|Improvement in the Arm function	University of Zurich	All	18 Years and older ¬† (Adult, Older Adult)	Not Applicable	14	Other	Interventional	Allocation: N/A|Intervention Model: Single Group Assignment|Masking: None (Open Label)|Primary Purpose: Treatment	2013-0182	2013-11-01	2014-11-01	2015-09-01	2014-03-27		2015-09-15	University Hospital Zurich, Divison of Neurology, Zurich, ZH, Switzerland		https://ClinicalTrials.gov/show/NCT02098135
NCT01989806	Robotic-assisted Locomotor Training on Mobility and Cardiopulmonary Function in Patients Suffering From Spinal Cord Injury		Completed	No Results Available	Spinal Cord Injury	Device: Robotic-assisted body weight supported treadmill training (Lokomat V6, Hocoma AG, Switzerland)|Device: Passive lower limbs mobilization training (Motomed Vivo 2, RECK, Germany)	Change in Walking Index for Spinal Cord Injury version II from baseline to 8 weeks	Kowloon Hospital, Hong Kong|The Hong Kong Polytechnic University	All	18 Years and older ¬† (Adult, Older Adult)	Not Applicable	16	Other	Interventional	Allocation: Randomized|Intervention Model: Parallel Assignment|Masking: Single (Participant)|Primary Purpose: Treatment	SCI-1	2013-12-01	2015-07-01	2015-07-01	2013-11-21		2019-01-28	Physiotherapy Department, Kowloon Hospital, Hong Kong, China		https://ClinicalTrials.gov/show/NCT01989806
NCT02006433	Treatment of Pain and Autonomic Dysreflexia in Spinal Cord Injury With Deep Brain Stimulation		Completed	No Results Available	Pain|Autonomic Dysreflexia	Device: Deep Brain Stimulation	Change in Pain as measured by Neuropathic Pain Symptom Inventory (NPSI)|Change in Pain as measured by Multidimensional pain Inventory (MPI-SCI)|Change in Pain as measured by the Basic Pain Data Set	Jonathan Jagid|United States Department of Defense|University of Miami	All	22 Years to 60 Years ¬† (Adult)	Not Applicable	4	Other|U.S. Fed	Interventional	Allocation: N/A|Intervention Model: Single Group Assignment|Masking: None (Open Label)|Primary Purpose: Device Feasibility	20120429|W81XWH-12-1-0559	2013-12-01	2017-09-01	2017-09-01	2013-12-10		2020-10-08	University of Miami Hospital, Miami, Florida, United States|VA Medical Center, Miami, Florida, United States	Study Protocol and Statistical Analysis Plan, https://ClinicalTrials.gov/ProvidedDocs/33/NCT02006433/Prot_SAP_000.pdf	https://ClinicalTrials.gov/show/NCT02006433
NCT02006901	Comparative Effectiveness of Microdecompression and Laminectomy for Central Lumbar Spinal Stenosis		Completed	No Results Available	Spinal Stenosis|Spinal Cord Compression	Procedure: microdecompression|Procedure: laminectomy	change in Oswestry Disability Index|changes in health-related quality of life|patient reported post-operative complications|surgeon reported complication|Length of hospital stay|Length of surgery	St. Olavs Hospital|Norwegian University of Science and Technology	All	18 Years and older ¬† (Adult, Older Adult)		721	Other	Observational	Observational Model: Cohort|Time Perspective: Prospective	2013/643	2014-01-01	2015-01-01	2015-01-01	2013-12-10		2015-04-08	St.Olavs Hospital, Trondheim, Norway		https://ClinicalTrials.gov/show/NCT02006901
NCT02043106	Can Vibration Stimulation of the Foot Sole Activate Leg Muscles?		Completed	No Results Available	Spinal Cord Injury	Other: plantar vibration	Muscle activity	Wilfrid Laurier University	All	18 Years to 45 Years ¬† (Adult)	Not Applicable	8	Other	Interventional	Allocation: Non-Randomized|Intervention Model: Single Group Assignment|Masking: None (Open Label)|Primary Purpose: Treatment	MC_SCIPS	2014-01-01	2014-04-01	2014-04-01	2014-01-23		2015-03-06	Biomechanics Lab, Wilfrid Laurier University, Waterloo, Ontario, Canada		https://ClinicalTrials.gov/show/NCT02043106
NCT03468439	Ultrasound and Peripheral Nerve Stimulator Guided Femoral Nerve Block		Completed	No Results Available	Spinal Cord Injuries	Other: Femoral nerve block with phenol	Modified Ashworth Scale|Functional independence measure	Gaziler Physical Medicine and Rehabilitation Education and Research Hospital	All	18 Years to 65 Years ¬† (Adult, Older Adult)	Not Applicable	14	Other	Interventional	Allocation: N/A|Intervention Model: Single Group Assignment|Masking: None (Open Label)|Primary Purpose: Treatment	1	2014-01-01	2016-12-01	2016-12-01	2018-03-16		2018-03-16			https://ClinicalTrials.gov/show/NCT03468439
NCT02104622	Identify Training Strategies for Progressing Exoskeleton Users Towards Everyday Functional Ambulation		Completed	No Results Available	Spinal Cord Injury	Device: ReWalk Rehabilitation 2.0	Change in 6 Minute Walk Test from baseline in distance, RPE and oxygen uptake|Change in 10 meter walk test from baseline in gait speed|Time and assistive level to negotiate stairs, ramps, curbs, and turning.|Distance able to reach while standing and sitting|Patient perception of Quality of Life|The Patient Health Questionnaire|The Psychosocial Impact of Assistive Devices Scale|Activities-specific…	Shirley Ryan AbilityLab|U.S. Department of Education	All	12 Years to 85 Years ¬† (Child, Adult, Older Adult)	Not Applicable	10	Other|U.S. Fed	Interventional	Allocation: N/A|Intervention Model: Single Group Assignment|Masking: None (Open Label)|Primary Purpose: Treatment	89259	2014-02-01	2020-01-01	2020-01-01	2014-04-04		2020-05-21	Rehabilitation Institute of Chicago, Chicago, Illinois, United States		https://ClinicalTrials.gov/show/NCT02104622
NCT02148887	Plasticity of Grey and White Matter in Response to Motor Skill Training in Healthy Individuals and Those With Spinal Cord Injury		Completed	No Results Available	Investigating Spinal Atrophy in Patients With Spinal Injury		MRI parameters: tensor based morphometry, longitudinal relaxation rate, magnetisation transfer and diffusion index changes in the cervical and cranial corticospinal tract, basal ganglia, motor, premotor and parietal cortex.|Raw performance data in the upper and lower limb training task, recorded at each training session.|Overall activity levels as recorded by a worn accelerometer and clinical sco…	University of Zurich|Foundation Wings For Life	All	18 Years to 60 Years ¬† (Adult)		51	Other	Observational	Observational Model: Case-Control|Time Perspective: Cross-Sectional	KEK-ZH-2013-0559/PB_2016-00624	2014-02-01	2018-05-01	2018-05-01	2014-05-28		2018-07-11	Universit√§tsklinik Balgrist, Zurich, Switzerland		https://ClinicalTrials.gov/show/NCT02148887
NCT02307565	Blood Pressure, Cerebral Blood Flow and Cognition in Spinal Cord Injury		Completed	No Results Available	Spinal Cord Injury	Drug: Midodrine|Drug: Placebo	Systolic Blood Pressure|Cerebral Blood Flow|Memory|Number of Hypertensive Events	James J. Peters Veterans Affairs Medical Center|Kessler Foundation	All	18 Years to 65 Years ¬† (Adult, Older Adult)	Phase 3	60	U.S. Fed|Other	Interventional	Allocation: Randomized|Intervention Model: Crossover Assignment|Masking: Double (Participant, Investigator)|Primary Purpose: Treatment	WEC-13-066	2014-03-01	2019-12-01	2019-12-01	2014-12-04		2020-02-11	Kessler Foundation Research Center, West Orange, New Jersey, United States|James J Peters VAMC, Bronx, New York, United States		https://ClinicalTrials.gov/show/NCT02307565
NCT02083601	Caring for Caregivers: Supporting Caregivers of Youth With Spinal Cord Injury		Completed	No Results Available	Spinal Cord Injuries	Behavioral: Parent Forum|Behavioral: Psychological support	Longitudinal changes in Social Problem Solving Inventory-Revised (SPSI-R) over time|Longitudinal changes in Satisfaction with Life Scale (SWLS) over time|Longitudinal changes in Hospital Anxiety and Depression Scale (HADS) over time|Longitudinal changes in Social support/Social integration questions over time|Longitudinal changes in Caregiver Burden Interview over time|Longitudinal changes in Med…	Erin Hayes Kelly, PhD|The Craig H. Neilsen Foundation|Shriners Hospitals for Children	All	7 Years and older ¬† (Child, Adult, Older Adult)	Not Applicable	53	Other	Interventional	Allocation: Randomized|Intervention Model: Parallel Assignment|Masking: None (Open Label)|Primary Purpose: Supportive Care	288993	2014-04-01	2016-12-01	2016-12-01	2014-03-11		2018-04-24	Shriners Hospitals for Children, Chicago, Illinois, United States		https://ClinicalTrials.gov/show/NCT02083601
NCT02115685	Sympathetic-Somatomotor Coupling in Human Spinal Cord Injury		Completed	No Results Available	Spinal Cord Injury	Other: Treadmill Training	Arterial blood flow|Graded Treadmill Exercise Test|Heart rate|Knee torque|Tendon tap reflexes	Shirley Ryan AbilityLab|Marquette University	All	18 Years to 75 Years ¬† (Adult, Older Adult)	Not Applicable	40	Other	Interventional	Allocation: Randomized|Intervention Model: Parallel Assignment|Masking: None (Open Label)|Primary Purpose: Treatment	R01NS079751	2014-04-01	2020-04-01	2020-04-01	2014-04-16		2021-05-06	Rehabilitation Institute of Chicago, Chicago, Illinois, United States		https://ClinicalTrials.gov/show/NCT02115685
NCT02336321	Daily-life Brain Control Of A Hand Exoskeleton After Cervical Spinal Cord Injury		Completed	No Results Available	Spinal Cord Injury	Device: BNCI controlled hand exoskeleton	Change of Toronto Rehabilitation Institute Hand Function Test (TRI-HFT) Score	University Hospital Tuebingen|Institut Guttmann|Scuola Superiore Sant'Anna di Studi Universitari e di Perfezionamento		15 Years to 65 Years ¬† (Child, Adult, Older Adult)	Phase 1	6	Other	Interventional	Allocation: N/A|Intervention Model: Single Group Assignment|Masking: None (Open Label)|Primary Purpose: Supportive Care	288551-2|SO-932|WAY-288551|01GQ0831	2014-04-01	2014-10-01	2015-05-01	2015-01-12		2015-05-14	Instituto Guttmann, Hospital de Neurorehabilitaci√≥, Badalona, Catalonia, Spain		https://ClinicalTrials.gov/show/NCT02336321
NCT03554733	Bridge Reinvention		Completed	No Results Available	Spinal Cord Injuries	Behavioral: ReInventing Yourself after SCI	Change in Moorong Self-Efficacy Scale (MSES)|Change in Generalized Self-Efficacy Scale (GSES)|Change in Satisfaction with Life Scale (SWLS)|Change in Participation Assessment with Recombined Tools - Objective (PART-O)|Patient Health Questionnaire - 9 (PHQ-9)|Change in General Anxiety Disorder 7-item (GAD-7)	Craig Hospital|The Craig H. Neilsen Foundation	All	18 Years and older ¬† (Adult, Older Adult)	Not Applicable	46	Other	Interventional	Allocation: Randomized|Intervention Model: Parallel Assignment|Masking: Single (Outcomes Assessor)|Primary Purpose: Treatment	2959	2014-04-01	2018-04-30	2018-04-30	2018-06-13		2018-06-13	Craig Hospital, Englewood, Colorado, United States		https://ClinicalTrials.gov/show/NCT03554733
NCT03991689	The Effect of Solution-focused Group Therapy for Pain Management in Patients With Spinal Cord Injury		Completed	No Results Available	Pain Management|Life Quality|Spinal Cord Injuries	Behavioral: solution-focused group therapy	The pain intensity and pain fear scale|Brief Pain Inventory-Pain inference|Pain management self-efficacy subscale and symptom response self-efficacy subscale within Chronic Pain Self-Efficacy Scale (CPSS)|The depression scale uses Patient Health Questionnaires-9|Demoralization scale - Mandarin Version (DS-M)|Post-traumatic growth inventory (PTGI)|The quality of life adopts Taiwan's concise versio…	National Taipei University of Nursing and Health Sciences	All	20 Years and older ¬† (Adult, Older Adult)	Not Applicable	26	Other	Interventional	Allocation: N/A|Intervention Model: Single Group Assignment|Masking: None (Open Label)|Primary Purpose: Supportive Care	NTUNHS	2014-04-29	2015-12-31	2015-12-31	2019-06-19		2019-06-19			https://ClinicalTrials.gov/show/NCT03991689
NCT02052024	Myobloc Atrophy Study	MAS	Completed	No Results Available	Spasticity Secondary to Either a Disorder or Trauma|Spinal Cord Injury (SCI)|Brain Injury|Tumor|Stroke	Drug: Botox|Drug: MYOBLOC	Volume and Cross-Sectional Area of Muscle|Modified Ashworth Scale	Georgetown University|Solstice Neurosciences	All	18 Years and older ¬† (Adult, Older Adult)	Phase 4	10	Other|Industry	Interventional	Allocation: Randomized|Intervention Model: Parallel Assignment|Masking: None (Open Label)|Primary Purpose: Treatment	USWM-206-1010	2014-05-01	2015-08-01	2015-08-01	2014-01-31		2015-12-16	Medstar Georgetown University Hospital, Washington, District of Columbia, United States		https://ClinicalTrials.gov/show/NCT02052024
NCT02803255	AAN Robotic Therapy in SCI		Completed	No Results Available	Spinal Cord Injuries	Device: MAHI Exo-II	Change in ARAT score|Change in Modified Ashworth Scale|Change in Grip Pinch Strength Assessment|Change in Graded Redefined Assessment of Strength, Sensibility and Prehension|Change in Smoothness metrics|Change in smoothness metrics	William Marsh Rice University	All	18 Years to 75 Years ¬† (Adult, Older Adult)	Phase 1	14	Other	Interventional	Allocation: Non-Randomized|Intervention Model: Parallel Assignment|Masking: Single (Outcomes Assessor)|Primary Purpose: Treatment	14-027F	2014-05-01	2015-09-01	2015-09-01	2016-06-16		2016-06-16	Rice University, Houston, Texas, United States|TIRR Memorial Hermann, Houston, Texas, United States		https://ClinicalTrials.gov/show/NCT02803255
NCT02815878	Enhance Wellness for Individuals With Long-Term Physical Disabilities		Completed	No Results Available	Multiple Sclerosis|Muscular Dystrophy|Post-polio Syndrome|Spinal Cord Injury	Behavioral: Enhance Wellness	Questionnaire: Level of reported self-efficacy as measured by the University of Washington Self-Efficacy Scale Questionnaire|Questionnaire: Patient Reported Outcome Measurement Information System (PROMIS) Pain Interference Short Form|Questionnaire: Patient Reported Outcome Measurement Information System (PROMIS) Depression Short Form	University of Washington	All	45 Years and older ¬† (Adult, Older Adult)	Not Applicable	240	Other	Interventional	Allocation: Non-Randomized|Intervention Model: Parallel Assignment|Masking: None (Open Label)|Primary Purpose: Health Services Research	47035	2014-05-12	2017-11-01	2017-11-01	2016-06-28		2018-04-03	University of Washington, Seattle, Washington, United States		https://ClinicalTrials.gov/show/NCT02815878
NCT02016768	Decompressive Cervical Surgery and Hypertension		Completed	No Results Available	Myelopathy, Compressive|Hypertension	Procedure: decompressive cervical surgery	Change from baseline in the systolic blood pressure(SBP) measured by 24-hour Ambulatory Blood Pressure Monitoring(ABPM) on 1st month and 3th month post-operation.	Peking University First Hospital|Peking University	All	18 Years to 84 Years ¬† (Adult, Older Adult)		50	Other	Observational	Observational Model: Cohort|Time Perspective: Prospective	PUCRP201304	2014-06-01	2016-12-01	2016-12-01	2013-12-20		2020-01-13	Hong LIu, Beijing, Beijing, China		https://ClinicalTrials.gov/show/NCT02016768
NCT02193334	Phase I/II Study of KP-100IT in Acute Spinal Cord Injury		Completed	No Results Available	Spinal Cord Injuries	Drug: KP-100IT|Drug: Placebo	Number and degree of adverse events|Change of ASIA (American Spinal Injury Association) motor score from baseline at 24 weeks|Change of ASIA motor score from baseline at 12 weeks|Time-dependent change of ASIA motor score from baseline|Time-dependent change of ASIA sensory score from baseline|Time-dependent grade change of modified Frankel scale from baseline|Time-dependent change of P-100 concent…	Kringle Pharma, Inc.	All	18 Years to 75 Years ¬† (Adult, Older Adult)	Phase 1|Phase 2	45	Industry	Interventional	Allocation: Randomized|Intervention Model: Parallel Assignment|Masking: Quadruple (Participant, Care Provider, Investigator, Outcomes Assessor)|Primary Purpose: Treatment	KP-100-ND002	2014-06-30	2017-12-21	2018-07-31	2014-07-17		2019-06-05	Spinal Injuries Center, Iizuka, Fukuoka, Japan|Hokkaido Chuo Rosai Hospital Sekison Center, Bibai, Hokkaido, Japan		https://ClinicalTrials.gov/show/NCT02193334
NCT02037620	Recovery of Cardiovascular Function With Epidural Stimulation After Human Spinal Cord Injury		Completed	No Results Available	Spinal Cord Injury	Device: 5-6-5 Specify electrode|Device: Restore Advance Pulse Generator	Recovery of Autonomic control of Cardiovascular function|Recovery of Autonomic control of respiratory function	University of Louisville	All	21 Years to 70 Years ¬† (Adult, Older Adult)	Not Applicable	4	Other	Interventional	Allocation: N/A|Intervention Model: Single Group Assignment|Masking: None (Open Label)|Primary Purpose: Basic Science	13.0625 CV Epi|ES2-CHN-2013(SH)	2014-07-01	2019-09-20	2019-09-20	2014-01-16		2021-07-20	University of Louisville, Louisville, Kentucky, United States		https://ClinicalTrials.gov/show/NCT02037620
NCT02083328	Influence of Caffeine on HRV and Exercise Performance in Spinal Cord Injury		Completed	No Results Available	Caffeine|Spinal Cord Injury	Dietary Supplement: Caffeine|Dietary Supplement: Placebo (Mannitol)	Exercise performance|Heart rate variability (HRV) before the ingestion of supplement|Heart rate variability (HRV) after the exercise performance test|Catecholamine|Heart rate variability 40min after the ingestion	Swiss Paraplegic Centre Nottwil|University Hospital Inselspital, Berne	Male	18 Years to 45 Years ¬† (Adult)	Not Applicable	35	Other	Interventional	Allocation: Randomized|Intervention Model: Factorial Assignment|Masking: Double (Participant, Care Provider)|Primary Purpose: Treatment	2014-03	2014-07-01	2014-12-01	2015-03-01	2014-03-11		2015-03-18	Sports Medicine Nottwil, Nottwil, Lucerne, Switzerland		https://ClinicalTrials.gov/show/NCT02083328
NCT02201173	Health Outcomes After Locomotor Training in Spinal Cord Injury		Completed	No Results Available	Spinal Cord Injuries|Spinal Cord Trauma	Behavioral: Locomotor Training	Blood Assays	Stony Brook University|Ohio State University|Kessler Institute for Rehabilitation|TIRR Memorial Hermann|University of Louisville|Craig Hospital	All	18 Years to 80 Years ¬† (Adult, Older Adult)	Not Applicable	80	Other|Industry	Interventional	Allocation: N/A|Intervention Model: Single Group Assignment|Masking: None (Open Label)|Primary Purpose: Treatment	376696	2014-07-01	2018-02-28	2018-02-28	2014-07-25		2019-04-04	Craig Hospital, Englewood, Colorado, United States|Frazier Rehab, Louisville, Kentucky, United States|Rehabilitation Research and Movement Performance Lab, Stony Brook, New York, United States		https://ClinicalTrials.gov/show/NCT02201173
NCT02203994	Extracorporeal Shock Wave Therapy (ESWT) for the Treatment of Spasticity in Persons With Spinal Cord Injury	ESWT	Completed	No Results Available	Spinal Cord Injury|Spasticity	Device: Duolith¬Æ SD 1 "T-Top" (Storz Medical AG, Switzerland)	severity of spasticity|personal goal attainment|walking speed|walking distance|thickness of the treated muscle	Swiss Paraplegic Centre Nottwil	All	18 Years to 80 Years ¬† (Adult, Older Adult)	Not Applicable	20	Other	Interventional	Allocation: N/A|Intervention Model: Single Group Assignment|Masking: None (Open Label)|Primary Purpose: Treatment	2014-07	2014-07-01	2016-10-01	2016-12-01	2014-07-30		2017-01-26	Swiss Paraplegic Centre, Nottwil, LU, Switzerland		https://ClinicalTrials.gov/show/NCT02203994
NCT02586649	24hr Effects of Tiotropium Bromide in Tetraplegia		Completed	No Results Available	Spinal Cord Injury	Drug: Tiotropium Bromide|Drug: Placebo	Change in Spirometry values from baseline|Change in Exhaled Nitric Oxide ( FeNO )|Change in Lung volumes ( Plethysmography )|Change in Airway Resistance by Impulse Oscillometry System (IOS)	James J. Peters Veterans Affairs Medical Center	All	18 Years to 65 Years ¬† (Adult, Older Adult)	Phase 2	10	U.S. Fed	Interventional	Allocation: Randomized|Intervention Model: Crossover Assignment|Masking: Triple (Participant, Care Provider, Investigator)|Primary Purpose: Treatment	SCH-14-019	2014-07-01	2019-12-01	2019-12-01	2015-10-26		2020-09-16	James J Peters VA Medical Center, New York, New York, United States		https://ClinicalTrials.gov/show/NCT02586649
NCT02132702	Performance Attributes and User Progression While Using Ekso		Completed	No Results Available	Spinal Cord Injury	Device: Ekso	Number of participants able to complete gait training progression using Ekso|Cardiovascular Effect|Impact of Ekso Training on Spasticity|Mobility Progression|Impact of Ekso Training on Strength|Change in Bladder Function|Functional Abilities|Change in Bowel Function|Quality of Life|Balance|Gait Speed|Gait Progression	Ekso Bionics|Glostrup University Hospital, Copenhagen	All	15 Years to 65 Years ¬† (Child, Adult, Older Adult)	Not Applicable	65	Industry|Other	Interventional	Allocation: N/A|Intervention Model: Single Group Assignment|Masking: None (Open Label)|Primary Purpose: Treatment	H-1-2013-082	2014-08-01	2017-01-01	2017-01-01	2014-05-07		2018-02-14	Glostrup Hospital, Hornbaek, Denmark|Universitats-und Rehabilitationskliniken, Ulm, Germany|Heliomare Revalidatie, Wijk aan Zee, Netherlands|Sunnaas Sykehus HF, Oslo, Norway|Institut Guttmann, Neurorehabilitation Hospital, Barcelona, Spain|Fundacion Lesionado Medular, Madrid, Spain|Clinical Department of Rehabilitation Medicine and Department of Medicine and Health Services, Linkoping, Sweden|Sin…		https://ClinicalTrials.gov/show/NCT02132702
NCT02178917	Neurofeedback for Treatment of Central Neuropathic Pain (CNP) in Sub-acute Spinal Cord Injury (SCI)		Completed	No Results Available	Spinal Cord Injury	Other: Neurofeedback therapy|Other: No neurofeedback therapy	Intensity of Pain|Changes in EEG activity|Changes in Spasticity|Changes in Mood|Changes in quality of sleep	NHS Greater Glasgow and Clyde|University of Glasgow	All	18 Years to 75 Years ¬† (Adult, Older Adult)	Not Applicable	20	Other	Interventional	Allocation: Randomized|Intervention Model: Parallel Assignment|Masking: None (Open Label)|Primary Purpose: Treatment	GN14NE311	2014-08-27	2017-11-29	2017-11-29	2014-07-01		2019-03-01	Queen Elizabeth National Spinal Injuries Unit, Southern General Hospital, Glasgow, United Kingdom		https://ClinicalTrials.gov/show/NCT02178917
NCT01865942	Surgical Spinal Decompression of Metastatic Spinal Cord Compression, Minimal Access Versus Open Surgery		Completed	No Results Available	Spinal Metastases	Procedure: open surgery|Procedure: Minimal access surgery	Bleeding|Health related quality of life measured with questionnaire EQ-5D and QLQ-C30	Rigshospitalet, Denmark	All	18 Years to 99 Years ¬† (Adult, Older Adult)	Not Applicable	50	Other	Interventional	Allocation: Randomized|Intervention Model: Parallel Assignment|Masking: None (Open Label)|Primary Purpose: Treatment	H-2-2011-050	2014-08-28	2017-01-02	2017-03-30	2013-05-31		2017-04-04	Rigshospitalet, Copenhagen, Denmark		https://ClinicalTrials.gov/show/NCT01865942
NCT02099357	Creatine or Vitamin D Supplementation in Persons With Spinal Cord Injury Undergoing Resistance Training		Completed	No Results Available	Spinal Cord Injuries	Dietary Supplement: Creatine|Dietary Supplement: Placebo|Dietary Supplement: Vitamin D	Body Mass Index|Sum of 4 skinfold|Corrected Arm Muscle Area|Seated Medicinal Ball Throw|Handgrip Strength with Hand Dynamometer|Manual Wheelchair Slalom Test	Universidade do Porto	All	18 Years and older ¬† (Adult, Older Adult)	Not Applicable	14	Other	Interventional	Allocation: Randomized|Intervention Model: Parallel Assignment|Masking: Triple (Participant, Care Provider, Investigator)|Primary Purpose: Supportive Care	FADEUPAFA20132015	2014-09-01	2015-07-01	2015-07-01	2014-03-28		2015-08-04	Centro de Medicina de Reabilita√ß√£o da Regi√£o Centro - Rovisco Pais, Cantanhede, Coimbra, Portugal|Centro de Reabilita√ß√£o do Norte, Vila Nova de Gaia, Porto, Portugal		https://ClinicalTrials.gov/show/NCT02099357
NCT02099890	The Effect of Diet on Chronic Inflammation and Related Disorders Following Spinal Cord Injury		Completed	No Results Available	Neuropathic Pain|Depression|Cognitive Impairment|Somatic Neuropathy|Autonomic Dysfunction	Dietary Supplement: Omega-3|Dietary Supplement: Vegetation Protein Powder|Dietary Supplement: InflanNox|Dietary Supplement: Anti-oxidant Network|Dietary Supplement: Chlorella	Change from baseline in nerve conduction velocity of somatic nerves at 3 and 6 months|Change in baseline in autonomic function scores on the Autonomic Standards Assessment Form at 3 and 6 months|Change in baseline pain scores on the Neuropathic Pain Questionnaire at 3 and 6 months|Change in baseline concentrations of pro-inflammatory eicosanoids at 3 and 6 months|Change in baseline depression sco…	Brock University|Ontario Neurotrauma Foundation	All	18 Years and older ¬† (Adult, Older Adult)	Phase 3	20	Other	Interventional	Allocation: N/A|Intervention Model: Single Group Assignment|Masking: None (Open Label)|Primary Purpose: Treatment	13-192 - DITOR	2014-09-01	2015-02-01	2015-02-01	2014-03-31		2015-07-30	Brock University, St Catharines, Ontario, Canada		https://ClinicalTrials.gov/show/NCT02099890
NCT02161913	Comparison of Two Psycho-educational Family Group Interventions for Persons With SCI and Their Caregivers		Completed	No Results Available	Spinal Cord Injury	Behavioral: Multi-Family Group Treatment|Behavioral: SCI Education Control Group	Change in ability to take action to improve one's health from baseline to end of treatment|Change in emotion regulation and interpersonal skills from baseline to end of treatment|Change in mental health and health behavior from baseline to end of treatment	St. Luke's Rehabilitation Institute|Washington State University|The Craig H. Neilsen Foundation	All	18 Years and older ¬† (Adult, Older Adult)	Not Applicable	38	Other	Interventional	Allocation: Randomized|Intervention Model: Parallel Assignment|Masking: None (Open Label)|Primary Purpose: Treatment	CHNF-288318	2014-09-01	2019-04-01	2019-04-01	2014-06-12		2019-04-16	St. Luke's Rehabilitation Institute, Spokane, Washington, United States		https://ClinicalTrials.gov/show/NCT02161913
NCT02262234	Education Interventions for Self-Management of Pain Post-SCI: A Pilot Study		Completed	No Results Available	Spinal Cord Injury|Chronic Pain	Other: Education Program Type 1|Other: Education Program Type 2	Pain interference with activities|Pain intensity|Mental health and well-being|Pain attitudes	Kessler Foundation|The Craig H. Neilsen Foundation|Kessler Institute for Rehabilitation	All	18 Years and older ¬† (Adult, Older Adult)	Phase 1|Phase 2	29	Other|Industry	Interventional	Allocation: Randomized|Intervention Model: Parallel Assignment|Masking: None (Open Label)|Primary Purpose: Treatment	R-815-14	2014-09-01	2015-11-01	2015-12-01	2014-10-13		2020-05-12	Kessler Foundation, West Orange, New Jersey, United States		https://ClinicalTrials.gov/show/NCT02262234
NCT03036527	Recovery of Bladder and Sexual Function After Spinal Cord Injury		Completed	No Results Available	Spinal Cord Injuries	Procedure: Activity-based locomotor training|Procedure: Activity-based stand training|Procedure: Activity-based upper arm ergometry	Bladder Storage|Bladder Emptying|Bladder Pressure|Compliance|International Index of Erectile Function (IIEF), Female Sexual function index (FSFI)	University of Louisville	All	18 Years and older ¬† (Adult, Older Adult)	Not Applicable	30	Other	Interventional	Allocation: Non-Randomized|Intervention Model: Parallel Assignment|Masking: None (Open Label)|Primary Purpose: Other	14.0062 Bladder Sex Fxn	2014-09-01	2019-11-01	2019-11-01	2017-01-30		2020-02-12	University of Louisville, Louisville, Kentucky, United States		https://ClinicalTrials.gov/show/NCT03036527
NCT02225028	Feasibility of Telephone Counseling to Increase Physical Fitness in SCI		Completed	No Results Available	Spinal Cord Injury	Behavioral: Physical Activity Counseling	The rate of enrollment|Study completion rate as it pertains to the feasibility of the study procedures|Call completion rate as it pertains to the feasibility of the study procedures|Number of Participants with Serious and Non-Serious Adverse Events|Missing data rates as it pertains to the feasibility of the study procedures|Cardiorespiratory Fitness (V02 Peak)|Minutes of moderate to vigorous phys…	University of Washington|The Craig H. Neilsen Foundation	All	18 Years to 70 Years ¬† (Adult, Older Adult)	Not Applicable	15	Other	Interventional	Allocation: Randomized|Intervention Model: Parallel Assignment|Masking: Single (Outcomes Assessor)|Primary Purpose: Treatment	47327-B|290122	2014-11-01	2016-07-01	2016-09-01	2014-08-25		2017-05-05	Harborview Medical Center, Seattle, Washington, United States|University of Washington Medical Center, Seattle, Washington, United States		https://ClinicalTrials.gov/show/NCT02225028
NCT02299557	The Effect of Oxymetazoline Gel on Anal Pressure and Incontinence in Spinal Cord Injury Patients		Completed	No Results Available	Fecal Incontinence|Spinal Cord Injury	Drug: Oxymetazoline gel|Drug: Placebo gel	To examine the effect of Oxymetazoline gel on fecal incontinence episodes in the 8 hours following application.|Pharmacokinetics (area under the curve [AUC]), peak concentration and half life time (T 1/2) of Oxymetazoline;|Number of participants with adverse events	RDD Pharma Ltd	All	18 Years to 55 Years ¬† (Adult)	Phase 1|Phase 2	19	Industry	Interventional	Allocation: Randomized|Intervention Model: Crossover Assignment|Masking: Quadruple (Participant, Care Provider, Investigator, Outcomes Assessor)|Primary Purpose: Treatment	RDD 116	2014-11-01	2015-06-01	2015-07-01	2014-11-24		2015-07-28	Semmelweis Egyetem I. sz. Belgy√≥gy√°szati Klinika, Budapest, Hungary		https://ClinicalTrials.gov/show/NCT02299557
NCT02533882	Lakeshore Examination of Activity and Disability Exercise Response Study	LEADERS	Completed	No Results Available	Multiple Sclerosis|Stroke	Behavioral: Movement to Music|Behavioral: Adapted Yoga	Cardiorespiratory Fitness as measured by sub-maximal VO2|Pain as measured by PROMIS Pain Interference Short Form 8a|Fatigue as measured by PROMIS Fatigue Short Form 8a|Loneliness as measured by the Three-Item Loneliness Scale|Grip Strength as measured by hand grip dynamometer|Strength as measured by Biodex System 3 Multijoint dynamometer|Balance as measured by the Timed Up and Go|Balance as measu…	University of Alabama at Birmingham|Lakeshore Foundation	All	18 Years to 65 Years ¬† (Adult, Older Adult)	Not Applicable	180	Other	Interventional	Allocation: Randomized|Intervention Model: Parallel Assignment|Masking: Single (Outcomes Assessor)|Primary Purpose: Supportive Care	F140821001	2014-12-01	2019-07-15	2019-08-30	2015-08-27		2019-10-15	Lakeshore Foundation, Birmingham, Alabama, United States		https://ClinicalTrials.gov/show/NCT02533882
NCT02705950	Intrathecal Baclofen (ITB) Bolus on Neuropathic Pain (NP). Preliminary Study.	ITB	Completed	No Results Available	Neuropathic Pain	Drug: Intrathecal baclofen bolus|Other: Placebo	Neuropathic Pain Inventory Scale (NPIS)|Modified Ashworth Scale (MAS)|Modified Penn Spasm Frequency Scale|Visual Analogue Scale (VAS) for spasticity|warm and heat pain perception threshold|evoked pain perception|contact heat evoked potentials.|Brief Pain Inventory (BPI)|Numerical Rating Scale (NRS) for neuropathic pain	Institut Guttmann|Medtronic	All	18 Years to 70 Years ¬† (Adult, Older Adult)	Not Applicable	12	Other|Industry	Interventional	Allocation: Randomized|Intervention Model: Parallel Assignment|Masking: Triple (Participant, Investigator, Outcomes Assessor)|Primary Purpose: Treatment	2014187	2014-12-01	2017-08-01	2017-08-01	2016-03-11		2019-08-08	Institut Guttmann, Badalona, Barcelona, Spain		https://ClinicalTrials.gov/show/NCT02705950
NCT03752749	Impact of Intermittent Hypoxia and Prednisolone on Motor Performance in Persons With SCI		Completed	No Results Available	Spinal Cord Injuries	Other: Prednisolone + Acute Intermittent Hypoxia|Other: Placebo + Acute Intermittent Hypoxia	Isometric Ankle Plantar Flexion strength	Shirley Ryan AbilityLab	All	18 Years to 65 Years ¬† (Adult, Older Adult)	Not Applicable	14	Other	Interventional	Allocation: Randomized|Intervention Model: Crossover Assignment|Masking: Double (Participant, Outcomes Assessor)|Primary Purpose: Treatment	STU00103487	2014-12-01	2016-12-01	2016-12-01	2018-11-26		2018-11-26			https://ClinicalTrials.gov/show/NCT03752749
NCT04991415	Manual Therapy for the Treatment of Shoulder Pain for Overuse Syndrome Wheelchair Dependent Persons	MTX	Completed	No Results Available	Spinal Cord Injuries|Pain|Musculoskeletal Manipulations	Other: Manual Therapy	Change in Wheelchair Users Shoulder Pain Index (WUSPI)|Change in Numerical Pain Rating Scale (NPRS)	Craig Hospital	All	18 Years to 65 Years ¬† (Adult, Older Adult)	Not Applicable	12	Other	Interventional	Allocation: Randomized|Intervention Model: Parallel Assignment|Masking: Single (Outcomes Assessor)|Primary Purpose: Treatment	Manual Therapy	2014-12-01	2017-12-01	2021-07-01	2021-08-05		2021-08-05	Craig Hospital, Englewood, Colorado, United States		https://ClinicalTrials.gov/show/NCT04991415
NCT02152657	Evaluation of Autologous Mesenchymal Stem Cell Transplantation in Chronic Spinal Cord Injury: a Pilot Study		Completed	No Results Available	Spinal Cord Injury	Other: Mesenchymal stem cell transplantation	Magnetic resonance imaging|Sensitivity and motor strength on the inferior limbs|Improvement in urological function|Improvements in sensorial mapping and neuropathic pain	Hospital Sao Rafael	All	18 Years to 65 Years ¬† (Adult, Older Adult)	Not Applicable	5	Other	Interventional	Allocation: N/A|Intervention Model: Single Group Assignment|Masking: None (Open Label)|Primary Purpose: Treatment	SCI-002	2015-01-01	2015-12-01	2016-12-01	2014-06-02		2017-04-26	Hospital S√£o Rafael, Salvador, Bahia, Brazil		https://ClinicalTrials.gov/show/NCT02152657
NCT02354625	The Safety of ahSC in Chronic SCI With Rehabilitation		Completed	No Results Available	Spinal Cord Injury|Paraplegia|Quadriplegia|Tetraplegia	Biological: Autologous human Schwann cells	International Standards of Neurological Classification of Spinal Cord Injury|Magnetic Resonance Imaging of spinal cord|Neuropathic Pain Symptoms Inventory|ISCI Basic Pain dataset version2|Pain Diagram|Quantitative Sensory Testing|Spinal Cord Independence Measure III|SCI-Functional Index Computer Adaptive Testing|10-Meter Walk Test|2-Minute Walk Test|Timed Up and Go|Timed Stair Climb|Capabilities …	W. Dalton Dietrich|The Miami Project to Cure Paralysis|University of Miami	All	18 Years to 65 Years ¬† (Adult, Older Adult)	Phase 1	8	Other	Interventional	Allocation: N/A|Intervention Model: Single Group Assignment|Masking: None (Open Label)|Primary Purpose: Treatment	20140846	2015-01-01	2019-08-12	2019-08-12	2015-02-03		2019-08-14	University of Miami, Miami, Florida, United States		https://ClinicalTrials.gov/show/NCT02354625
[truncated: 981 more rows]

## Sheet: Sheet 2 - 262 rejected trials
NCT Number	Title	Acronym	Status	Study Results	Conditions	Interventions	Outcome Measures	Sponsor/ Collaborators	Gender	Age	Phases	Enrollment	Funded Bys	Study Type	Study Designs	Other IDs	Start Date	Primary Completion Date	Completion Date	First Posted	Results First Posted	Last Update Posted	Locations	Study Documents	URL	Reason for exclusion
[truncated: 262 more rows]

## Sheet: Sheet 3 - 1149 included trials
NCT Number	Title	Acronym	Status	Study Results	Conditions	Interventions	Outcome Measures	Sponsor/ Collaborators	Gender	Age	Phases	Enrollment	Funded Bys	Study Type	Study Designs	Other IDs	Start Date	Primary Completion Date	Completion Date	First Posted	Results First Posted	Last Update Posted	Locations	Study Documents	URL	Primary Endpoints Met?	Intervention Type 1	Intervention Type 2	Intervention Type 3	Intervention Type 4	Primary Outcome 1	Primary Outcome 2	Primary Outcome 3	Primary Outcome 4	Primary Outcome 5	Primary Outcome 6	Primary Outcome 7	Primary Outcome 8	Primary Outcome 9	Primary Outcome 10	Primary Outcome 11	Primary Outcome 12	Secondary Outcome 1	Secondary Outcome 2	Secondary Outcome 3	Secondary Outcome 4	Secondary Outcome 5	Secondary Outcome 6	Secondary Outcome 7
[truncated: 1,149 more rows]
[truncated: 8 more columns]
